# 1 Characterization of endogenous *Rubus* yellow net virus in raspberries

2 Thien Ho<sup>1\*</sup>, Janet C. Broome<sup>1</sup>, Jason P. Buhler<sup>1</sup>, Wendy O'Donovan<sup>1</sup>, Tongyan Tian<sup>2</sup>, Alfredo Diaz-Lara<sup>3</sup>, Robert R.  
3 Martin<sup>4</sup>, Ioannis E. Tzanetakis<sup>5</sup>

4 <sup>1</sup> Driscoll's Inc., Watsonville, CA 95076, USA

5 <sup>2</sup> California Department of Food and Agriculture, Sacramento, CA 95832, USA

6 <sup>3</sup> School of Engineering and Sciences, Tecnológico de Monterrey, Campus Queretaro, Queretaro 76130,  
7 Mexico

8 <sup>4</sup> Department of Botany and Plant Pathology, Oregon State University, and USDA-ARS Horticultural Crops  
9 Research Unit, Corvallis, OR 97330, USA

10 <sup>5</sup> Department of Entomology and Plant Pathology, Division of Agriculture, University of Arkansas System,  
11 Fayetteville, AR 72701, USA

12 \* Corresponding author: [thien.ho@driscolls.com](mailto:thien.ho@driscolls.com)

## 13 Abstract

14 *Rubus* yellow net virus (RYNV) belongs to genus *Badnavirus*. Badnavirids are found in plants as  
15 endogenous, inactive sequences, and/or in episomal (infectious and active) forms. To assess the state of  
16 RYNV infections, we sequenced the genomes of various *Rubus* cultivars and mined eight additional  
17 published whole genome sequencing datasets. Sequence analysis revealed the presence of a diverse  
18 array of endogenous RYNV (endoRYNV) sequences that differ significantly in their structure; some  
19 lineages have nearly complete, yet non-functional genomes whereas others have rudimentary, small  
20 sequence fragments. We developed assays to genotype the six main endoRYNV lineages as well as the  
21 only known episomal lineage in commercial *Rubus*. This study discloses the widespread presence of  
22 endoRYNVs in commercial raspberries, likely because breeding programs have been using a limited pool  
23 of germplasm that harbored endoRYNVs.

24 **Keywords:** *Rubus yellow net virus*, raspberry, *Rubus*, *Badnavirus*, virus diversity  
25

## 26 1. Introduction

27 Raspberry is an economically important crop with global production in 2018 being over 820,000 tons  
28 grown in 125,000 hectares in all continents except Antarctica ("Production of raspberries in 2018".  
29 United Nations, Corporate Statistical Database (FAOSTAT) 2019, retrieved January 14, 2021).  
30 Commercial breeding for red raspberry (*Rubus idaeus*) began about 200 years ago, and most of the  
31 currently available cultivars share the same germplasm pedigree dating back to the late 1800s and early  
32 1900s (Jennings, 2018).

33 More than 40 virus species are known to infect *Rubus*; yet *Rubus* yellow net virus (RYNV) is one of only  
34 two badnaviruses known to infect the genus (Diaz-Lara et al., 2015; Shahid et al., 2017). The genus  
35 *Badnavirus*, family *Caulimoviridae*, includes viruses that have an inactive, endogenous form and an  
36 infectious, episomal form. *Banana streak OL virus* (BSOLV), *Banana streak GF virus* (BSGFV), and *Banana*  
37 *streak IM virus* (BSIMV) integrants have been shown to reactivate from an inactive integrated  
38 counterpart (Chabannes et al., 2013; Gayral et al., 2008; Ndowora et al., 1999), whereas no other  
39 badnavirid is known to reactivate from integrated sequences (reviewed by Bhat et al., 2016).

40 RYNV is a component of raspberry mosaic, an important disease first described in the 1920s (Bennett,  
41 1927; Stace-Smith, 1955). The virus infects all red raspberry and most blackberry and hybrid berry  
42 cultivars in North America and Europe (Stace-Smith and Jones, 1987a) and can reduce yield from 30-75%  
43 in the first year and up to 15% in subsequent years in mixed infections with black raspberry necrosis  
44 virus (Stace-Smith and Jones, 1987b). Partial RYNV sequences were first obtained at the turn of the  
45 century (GenBank accession number AF468454; Jones et al., 2002). The plant used in the Jones et al.  
46 (2002) study had virus-like symptoms and bacilliform particles were observed under the electron  
47 microscope. The first RYNV genome (RYNV-Ca, GenBank accession number KF241951), assembled from  
48 two PCR amplicons, was obtained by Kalischuk et al. (2008). Another genome (RYNV-BS, KM078034,  
49 Diaz-Lara et al., 2015) was sequenced from red raspberry 'Baumforth's Seedling A' using DNA from  
50 rolling circle amplification. Since then, several RYNV sequences were published using small RNA  
51 (Rajamäki et al., 2019) or whole genome sequencing (MN245240).

52 Diaz-Lara (2016) observed that red raspberry plants, supposedly free of RYNV based on aphid or graft  
53 transmission onto *R. occidentalis* 'Munger' indicator, yielded positive results when indexed by PCR-  
54 based assays. Moreover, those plants were tested positive for RYNV by PCR even after heat therapy and  
55 meristem-tip culture for virus elimination. It was demonstrated that RYNV integrates into the red  
56 raspberry genome (Diaz-Lara et al., 2020), but no further analysis was conducted for the reported  
57 endogenous RYNV (endoRYNV) sequences. In this study, multiple cultivars were assayed to determine  
58 the prevalence of endoRYNV and the lineages identified were validated and characterized in-depth.

## 59 **2. Materials and methods**

### 60 **2.1. Plant material**

61 Twenty-five raspberry cultivars maintained as tissue culture plantlets in Watsonville, California were  
62 used in the study (Table 1). For 'Baumforth's Seedling A', an additional mature plant was obtained from  
63 Corvallis, Oregon with the RYNV-BS (Diaz-Lara et al., 2015; Table 1) and used as a positive control for the  
64 episomal form, hereafter referred to as epiRYNV-BS. In addition, the genome of 75 proprietary red  
65 raspberry and 100 proprietary blackberry cultivars were sequenced and assayed for integration of RYNV-  
66 BS and the episomal form of the virus but their identity is not provided to protect intellectual property  
67 rights.

### 68 **2.2. DNA purification, sequencing, and virus discovery**

69 DNA was extracted using either the DNeasy(R) kit (Qiagen) or the method described by Poudel et al.  
70 (2013). All DNA libraries were constructed using a TruSeq DNA HT Sample Prep(R) kit and sequenced  
71 individually using paired-end (2 × 300 bp) Illumina HiSeq configuration by Novogene (Sacramento, CA).

72 Raw Illumina reads were subject to de novo assembly using Spades (Bankevich et al., 2012). BLASTn  
73 search (Camacho et al., 2009) was performed on the output contigs with e-value=10 against published  
74 RYNV nucleotide sequences (nt) downloaded from GenBank nt database (January 16, 2021). After RYNV  
75 hits were filtered out, the remaining contigs were processed using BLASTx against a database containing  
76 all RYNV protein sequences downloaded from GenBank nr (January 16, 2021). All Illumina datasets were  
77 also submitted to VirFind (<http://virfind.org>, Ho and Tzanetakis, 2014) for virus detection and discovery.  
78 Bowtie2 (Langmead and Salzberg, 2012) was used for mapping raw reads to RYNV contigs for visual  
79 confirmation of the mapping assemblies with Tablet (Milne et al., 2013). BioEdit (Hall, 1999) was used to  
80 calculate sequence identity matrix, and ClustalW (Thompson et al., 1994) of the MEGA X software  
81 (Kumar et al., 2018) applied to align nucleotide and amino acid sequences. ExPasy  
82 (<https://web.expasy.org/translate/>) was used to predict open reading frames (ORF). Conserved domain  
83 search was done using the NCBI homonymous tool (Lu et al., 2020). Breaking points of the RYNV  
84 lineages were identified by aligning raw Illumina reads with BLASTn against the assembled sequences  
85 and partially aligned reads were manually analyzed for sequence identities.

### 86 **2.3. Electron microscopy**

87 Tissues were homogenized in 100 mM potassium phosphate pH 7.0, 2% polyvinylpyrrolidone  
88 (MW:10,000) and 0.2% Na<sub>2</sub>SO<sub>3</sub> at 1:20 (w:v). After a low-speed centrifugation at 10,000 g, the  
89 supernatant was used for immunosorbent electron microscopy (ISEM) according to Lockhart (1986).  
90 Briefly Formvar/carbon coated copper grids were floated on 10 µl of the capture antibodies of  
91 sugarcane bacilliform virus (NanoDiagnostics, Arkansas) diluted 1:10 in 50 mM potassium phosphate  
92 buffer pH7.0. After 30 min incubation at 37°C, grids were rinsed with 50 mM potassium phosphate  
93 buffer pH7.0, and then floated on 30 µl of the sample preparations for 20-22 hrs at 4°C. The grids were  
94 then rinsed with 50 mM potassium phosphate buffer pH7.0 containing 100 µg/ml bacitracin and stained  
95 with 0.5% phosphotungstic acid pH7.0 containing 100 µg/ml bacitracin. The grids were examined using a  
96 Hitachi H-7500 transmission electron microscope (Hitachi High-Tech Corporation, Fukuoka, Japan) with  
97 an AMT Biosprint 12M-B CCD camera (Advanced Microscopy Techniques, Woburn, MA). Virus particles  
98 were measured using the camera software.

### 99 **2.4. Data mining**

100 Published datasets were mined for RYNV sequences (Table 1) including raw Illumina data of red  
101 raspberry cultivars 'Caroline', 'Cascade Bounty', 'Comox', 'Glen Cova', 'Meeker', and 'Willamette' from  
102 the Diaz-Lara et al. (2020) study, 'Glen Moy' from Hackett et al. (2018), and the assembled 'Joan J'  
103 genome, obtained using PacBio and Illumina sequencing (Wight et al. 2019). These eight datasets were  
104 processed using the procedures described above.

### 105 **2.5. Development of RYNV lineage-specific primers and validation**

106 For each endo/epi RYNV lineage, 20 PCR primer sets were designed by processing the corresponding  
107 sequences using PrimerQuest at default parameters for 'qPCR Intercalating Dyes' option (Integrated  
108 DNA Technologies, IDT). The outputs were aligned with all RYNV sequences and 5-10 oligo pairs were  
109 selected with each oligo, when possible, having at least 2nt mismatches to other RYNV lineages. SYBR  
110 Green quantitative PCR was performed for each set against cultivars 1-25 (Table 1) using 20 ng plant  
111 DNA, 5 µl Maxima SYBR Green qPCR Master Mix (2X) (Thermo Scientific, catalog number K0253), 1 µM

112 each of forward and reverse primers, and water to 10  $\mu$ l. Amplification was performed on QuantStudio 6  
113 Flex instrument (Applied Biosystems) with the amplification program consisting of 95°C for 10 min,  
114 followed by 40 cycles of 95°C, 53°C, and 72°C, for 20s each. The melting stage started at 53°C for 1m,  
115 increased by 0.05°C/s and stopped after reaching 95°C for 15s. To investigate further the possibility of  
116 integration of the epiRYNV-BS lineage, we used the most consistent assay against the epiRYNV-BS  
117 lineage developed here against a panel of 271 public and proprietary genotypes bulked into 294 DNA  
118 samples consisting of 876 plants (Supplemental table). Samples were considered positive for a lineage if  
119 there was amplification with the correct melting point. The previously published assay of Diaz-Lara et al.  
120 (2020) was also included in this validation for specificity comparison.

### 121 **3. Results**

#### 122 ***3.1. A diverse array of endoRYNV is present in raspberry***

123 The presence of RYNV DNA in commercial raspberries was investigated by whole genome sequencing  
124 and mining data of 25 and 8 cultivars, respectively (Table 1). Sequencing produced approximately 9 Gbp  
125 for each cultivar, representing  $\sim$ 30X coverage of the predicted 300-Mbp raspberry genome (Wight et  
126 al., 2019). BLASTn and BLASTx steps using contigs assembled from the raspberry genomes found no  
127 evidence of RYNV DNA in cultivars ‘Korbfüller’, ‘Lloyd George’, ‘Malling Jewel’, ‘Octavia’, ‘Yellow  
128 Antwerp’, or the black raspberry cultivar ‘Munger’. The remaining 27 cultivars showed a diverse array of  
129 RYNV sequences, ranging from six partial genomic segments with duplicated and rearranged sequences,  
130 to rudimentary fragments of a few hundred base pairs. None of the newly discovered lineages possesses  
131 an intact genome. Bacilliform virus particles were consistently observed using electron microscope from  
132 ‘Baumforth’s Seedling A’ from Corvallis OR, the only sample in the study with a verified episomal form of  
133 the virus (Diaz-Lara et al., 2020) (Figure 1). The size of the virions is approximately 149 nm X 33 nm  
134 ( $n=102$ ). No additional badnavirid sequences were detected in this or any other sample using VirFind (Ho  
135 and Tzanetakis, 2014) indicating that the observed particles belong to RYNV. Bacilliform particles were  
136 not detected from any of the other samples, including the ‘Baumforth’s Seedling A’ from Watsonville CA  
137 indicating that all other RYNV sequences are integrated in the raspberry genome.

#### 138 ***3.2. Structure of main endoRYNV lineages***

139 RYNV-derived sequences more than 4 Kbp in length were named based on the oldest cultivars they were  
140 identified in. RYNV has five conserved badnavirid domains including reverse transcriptase, ribonuclease  
141 H (RNaseH), pepsin-like aspartate protease, a zinc knuckle which is a zinc binding motif from retroviral  
142 gag proteins (nucleocapsid), and a ribosomal L25/TL5/CTC N-terminal 5S rRNA binding domain (Diaz-  
143 Lara et al., 2015). The reverse transcriptase and RNaseH (RT\_RNaseH) domains were concatenated and  
144 used for sequence comparison against those of the three available genomes (GenBank accession  
145 numbers KF241951, KM078034, and MN245240). The new lineages shared >78.5% in nucleotide  
146 identities to each other and the epiRYNV-BS (Table 2).

##### 147 **3.2.1. endoRYNV-CU1**

148 ‘Cuthbert’ (1865 release, New York), has three endoRYNVs (namely endoRYNV-CU1, -CU2, and -CU3)  
149 and is the oldest cultivar in the study having an endoRYNV. endoRYNV-CU1 was discovered in 12  
150 cultivars (Table 1). The 7268-nt segment has intact 5’ intergenic region (IG), ORF1, ORF2, but when  
151 compared to epiRYNV-BS, ORF3 is missing 549 bp after nt1691, corresponding to 183 amino acids (aa),

152 at the site for the ribosomal L25/TL5/CTC N-terminal 5S rRNA binding domain, essential to the  
153 badnavirus movement (Figure 2). The four other domains are similar to the epiRYNV-BS. ORFs 4 and 6  
154 are embedded intact within ORF3.

155 endoRYNV-CU1 RT\_RNaseH region shares 100% nt identity with that of RYNV-Ca (Kalischuk et al., 2013).  
156 However, there is 12.9% nt diversity between the two lineages. endoRYNV-CU1 3' IG is intact but very  
157 different from RYNV-Ca 3' IG, sharing only 29% nt identity (Figure 3). The RYNV-Ca has two inverted  
158 repeats, at nt4325-4693 and nt7564-7932. The endoRYNV-CU1 integrant is highly fragmented and has  
159 breaking points at genomic nt positions 12, 15, 767, 815, 1321, 1426, 2473, and 6527 (Table 3). One  
160 plant-virus junction was detected at nt7268.

### 161 **3.2.2. endoRYNV-CU2**

162 The second 'Cuthbert' endoRYNV (CU-2) is present in 11 cultivars. The 7252-nt sequence starts with the  
163 complete 5' IG, ORF1 and ORF2. When aligned against epiRYNV-BS, ORF3 is lacking a 141-nt stretch after  
164 nt2455, corresponding to 47 aa. Similar to endoRYNV-CU1, it has four conserved domains similar to the  
165 epiRYNV-BS but missing the ribosomal L25/TL5/CTC N-terminal 5S rRNA binding domain as well as about  
166 428 nt of the 3' IG. Alike endoRYNV-CU1, its ORF4 and ORF6 are embedded intact within ORF3. The  
167 endoRYNV-CU2 RT\_RNaseH region shares 79% nt identity with that of epiRYNV-BS and the integrant is  
168 fragmented at genomic nt positions 2217 and 5319, with plant-virus junctions detected at nt1, 188, and  
169 5863.

### 170 **3.2.3. endoRYNV-CU3**

171 The third 'Cuthbert' endoRYNV (CU-3) is present in five cultivars and is heavily truncated. It is lacking 5'  
172 IG, ORF1 and ORF2. Its sequence starts with a truncated ORF3 and together with the 3' IG accounting for  
173 a 4550-bp stretch. Its RT\_RNaseH region shares 99.6% to RYNV-Cu from Chile (MN245240). The  
174 integrant is fragmented at nt4423 and 4550, and has plant-virus junctions at nt1 and 1492.

### 175 **3.2.4. endoRYNV-BS**

176 The endoRYNV-BS was first detected in 'Baumforth's Seedling A' (1880 release, UK) and is present in 17  
177 cultivars. The lineage is 7602 bp, and has intact 5' IG, ORF1, and ORF2. When aligned against epiRYNV-  
178 BS, ORF3 is missing a 132-nt stretch after nt2445 corresponding to 44 aa, and the 3' IG lacks 83 bp. This  
179 lineage has all five conserved badnavirid domains. The lineage is present in the assembled genome of  
180 'Joan J' as a single copy on chromosome 4. The integrant is 12,143 bp and composed of two fragments.  
181 The first is in the forward orientation and contains complete 5' IG that forms a junction with the plant  
182 DNA at its 5' end, followed by complete ORF1, ORF2, and part of ORF3 that is truncated at nt6317. The  
183 second follows immediately after in the reverse orientation, with a truncated 3' IG at nt7602, then  
184 continues with ORF3 but truncated at nt1777 fusing to the plant genome. No full-length ORF3 is present  
185 in either of the fragments.

### 186 **3.2.5. endoRYNV-PH1**

187 First detected in Phoenix (1896 release, UK), endoRYNV-PH1 is present in nine cultivars. The 6631nt  
188 sequence starts with the 5' IG, followed by the ORF1 of 177 nt and missing 380 nt after nt561 when  
189 aligned against the epiRYNV-BS, before an intact ORF2. ORF3 is missing 675 nt after nt1307 as well as

190 the ribosomal L25/TL5/CTC N-terminal 5S rRNA binding domain. It has the four other conserved domains  
191 similar to the epiRYNV-BS. The integrant is fragmented at genomic nt positions 335, 1373, 1814, and  
192 5859, with nt1 and nt6631 connected to the plant DNA.

### 193 **3.2.6. endoRYNV-PH2**

194 The last substantial integrated RYNV sequence, endoRYNV-PH2, was only found in 'Phoenix'. The 7091-  
195 nt fragment's 5' end has the intact 5' IG, ORF1 and ORF2. ORF3 misses 141 nt after nt2461  
196 corresponding to 47 aa, and the fragment terminates at nt7091. This sequence has all conserved  
197 domains found in the epiRYNV-BS. The integrant is fragmented at nt2201 and 2432, and has two plant-  
198 virus junctions at nt3094 and 7091.

### 199 **3.3. Validation**

200 SYBR Green qPCR assays were able to differentiate between the epiRYNV-BS and each of the main  
201 endoRYNVs in all cultivars used in this study, either in single or multiple integration events (Figure 4,  
202 Table 1). Except the positive control 'Baumforth's Seedling A' OR, the epiRYNV-BS lineage was not  
203 detected in any of the genetics used in this study (Figure 5). The epiBS-2604F/2715R assay did not have  
204 off-target melting points and amplifications, compared to the Diaz-Lara et al. (2020) assay, presently  
205 considered the better assay for RYNV detection, with off-target in 43 cases (Supplemental figure).

## 206 **4. Discussion**

207 We analyzed the genome sequence data of commercial cultivars from around the globe released as  
208 early as 1802 and as recent as 2006. Integrated RYNV sequences were present in 27/33 cultivars (82%).  
209 The endoRYNV population could be categorized into six main lineages and other short endogenous  
210 fragments. The diversity of endoRYNV is complex with sometimes sequences having inversions,  
211 duplications, or deletions.

212 *Rubus* domestication has resulted in a reduction of genetic diversity (Haskell, 1960; Jennings, 1988), and  
213 modern cultivars are genetically similar to each other (Dale et al., 1993; Graham and McNicol, 1995).  
214 This can be seen in the case of the cultivars analyzed in this study. All breeding programs share the same  
215 endoRYNV lineages, which in turn were discovered in three cultivars commercialized in the 19<sup>th</sup> century:  
216 'Cuthbert' (1865), 'Baumforth's Seedling A' (1880), and 'Phoenix' (1896). These endogenous sequences  
217 presumably became widespread as the three aforementioned cultivars were used as parents, or are in  
218 the lineages of most raspberry breeding programs worldwide.

219 endoRYNV-CU1 lineage is the closest isolate to the published RYNV-Ca sequence (KF241951) (Kalischuk  
220 et al., 2013). Since RYNV-Ca has two inverted repeats, misses the true 3' IG, and hence likely is an  
221 endogenous sequence, we consider epiRYNV-BS as the sole episomal RYNV lineage known to infect  
222 *Rubus*. It is important to note that when aligned against the epiRYNV-BS sequence, all endoRYNV  
223 lineages are truncated and missing genomic DNA stretches. From this data, we hypothesize that the  
224 endoRYNVs are unable to reactivate and become episomal due to their incomplete genomes. In addition  
225 to the raspberry cultivars of this study, we sequenced the whole genome of an additional 75 proprietary  
226 red raspberry cultivars, and epiRYNV-BS was absent in all (data not shown), indicating that this lineage  
227 may be unable to integrate in the raspberry genome. We also sequenced the genomes of 100

228 proprietary blackberry cultivars (data not shown) but did not find any evidence of endoRYNV, suggesting  
229 that endoRYNV sequences may be limited to red raspberry.

230 Diagnostic tests for infectious agents are necessary so that phytosanitary agencies can protect a  
231 country's natural resources and agriculture. However, the Rubus industry could be significantly  
232 impacted if a diagnostic test was positive for RYNV but inadvertently a no-risk endoRYNV was detected.  
233 Published PCR primers were designed to target either RYNV-Ca or epiRYNV-BS as they had been the only  
234 known RYNV lineages (Diaz-Lara et al., 2020; Jones et al., 2002; Kalischuk et al., 2008). Diaz-Lara et al.  
235 (2020) showed that primers currently used for RYNV detection could produce positive results in cultivars  
236 only harboring endoRYNV DNA, indicating the urgency to have a good diagnostic test that can clearly  
237 differentiate the two forms, similar to epiBS-2604F/2715R. This test should be developed and validated  
238 for accuracy and sensitivity against a wide range of episomal isolates.

239 Theoretically, endoRYNV can be removed from the red raspberry by traditional breeding. However, the  
240 effort required to remove endoRYNV DNA after multiple generations of backcrossing would be  
241 considerable, especially when desired traits must be retained. CRISPR-Cas9 could be used to remove the  
242 endoRYNVs, but for cultivars with multiple endoRYNV fragments, multiple gene-editing events will need  
243 to be done. We believe that such actions are not necessary as endoRYNV fragments could not  
244 reconstruct a full, infectious, genome.

## 245 **5. Conflict of interest**

246 T.H., J.C.B., J.P.B., W.O. are employees of Driscoll's Inc.

## 247 **6. Acknowledgement**

248 This work could not have been accomplished without the help of various colleagues. We thank the  
249 Driscoll's team including the raspberry breeding, molecular genetics, and greenhouse departments; and  
250 Melanie Kalischuk and Hanu Pappu for discussion of the RYNV-Ca work.

## 251 **7. Data availability**

252 The assembled sequences of endoRYNV-CU1, endoRYNV-CU2, endoRYNV-CU3, endoRYNV-BS,  
253 endoRYNV-PH1, and endoRYNV-PH2 were deposited on the NCBI's GenBank under accessions XXX-XXX,  
254 and the raw Illumina reads of all cultivars sequenced in this study to the Sequence Read Archive (SRA)  
255 under accessions XXX-XXX.

## 256 **8. References**

257 Bankevich, A., Nurk, S., Antipov, D., Gurevich, A.A., Dvorkin, M., Kulikov, A.S., Lesin, V.M., Nikolenko, S.I.,  
258 Pham, S., Prjibelski, A.D., Pyshkin, A.V., Sirotkin, A.V., Vyahhi, N., Tesler, G., Alekseyev, M.A.,  
259 Pevzner, P.A., 2012. SPAdes: a new genome assembly algorithm and its applications to single-  
260 cell sequencing. *J Comput Biol* 19, 455–477. <https://doi.org/10.1089/cmb.2012.0021>

261 Bennett, C.W., 1927. Virus diseases of raspberries. *Mich. Agr. Expt. Sta. Tech. Bull.*

- 262 Camacho, C., Coulouris, G., Avagyan, V., Ma, N., Papadopoulos, J., Bealer, K., Madden, T.L., 2009.  
263 BLAST+: architecture and applications. *BMC Bioinformatics* 10, 421–421.  
264 <https://doi.org/10.1186/1471-2105-10-421>
- 265 Chabannes, M., Baurens, F.-C., Duroy, P.-O., Bocs, S., Vernerey, M.S., Rodier-Goud, M., Barbe, V., Gayral,  
266 P., Iskra-Caruana, M.-L., 2013. Three infectious viral species lying in wait in the banana genome.  
267 *Journal of Virology* 87, 8624–8637.
- 268 Dale, A., Moore, P.P., McNicol, R.J., Sjulín, T.M., Burmistrov, L.A., 1993. Genetic diversity of red  
269 raspberry varieties throughout the world. *Journal of the American Society for Horticultural*  
270 *Science* 118, 119–129. <https://doi.org/10.21273/JASHS.118.1.119>
- 271 Diaz-Lara, A., 2016. Identification of Endogenous and Exogenous Pararetroviruses in Red Raspberry  
272 (*Rubus idaeus* L.) and Blueberry (*Vaccinium corymbosum* L.). PhD thesis. Oregon State  
273 University.
- 274 Diaz-Lara, A., Mosier, N.J., Keller, K.E., Martin, R.R., 2015. A variant of Rubus yellow net virus with  
275 altered genomic organization. *Virus Genes* 50, 104–110. <https://doi.org/10.1007/s11262-014-1149-6>
- 277 Diaz-Lara, A., Mosier, N.J., Stevens, K., Keller, K.E., Martin, R.R., 2020. Evidence of Rubus Yellow Net  
278 Virus Integration into the Red Raspberry Genome. *Cytogenetic and Genome Research* 160, 329–  
279 334. <https://doi.org/10.1159/000509845>
- 280 Gayral, P., Noa-Carrazana, J.-C., Lescot, M., Lheureux, F., Lockhart, B.E.L., Matsumoto, T., Piffanelli, P.,  
281 Iskra-Caruana, M.-L. 2008. A single Banana streak virus integration event in the banana genome  
282 as the origin of infectious endogenous pararetrovirus. *Journal of Virology* 82, 6697–6710.
- 283 Graham, J., McNicol, R.J., 1995. An examination of the ability of RAPD markers to determine the  
284 relationships within and between *Rubus* species. *Theoretical and Applied Genetics* 90, 1128–  
285 1132. <https://doi.org/10.1007/BF00222932>
- 286 Hackett, C.A., Milne, L., Smith, K., Hedley, P., Morris, J., Simpson, C.G., Preedy, K., Graham, J., 2018.  
287 Enhancement of Glen Moy x Latham raspberry linkage map using GbS to further understand  
288 control of developmental processes leading to fruit ripening. *BMC Genetics* 19, 59.  
289 <https://doi.org/10.1186/s12863-018-0666-z>
- 290 Hall, T., 1999. BioEdit: a user-friendly biological sequence alignment editor and analysis program for  
291 Windows 95/98/NT. *Nucleic Acids Symposium Series* 41, 95–98.
- 292 Haskell, G., 1960. The raspberry wild in Britain. *Watsonia* 4, 238–255.
- 293 Ho, T., Tzanetakis, I.E., 2014. Development of a virus detection and discovery pipeline using next  
294 generation sequencing. *Virology* 471–473, 54–60. <https://doi.org/10.1016/j.virol.2014.09.019>
- 295 Jennings, D.L., 1988. Raspberries and blackberries: their breeding, diseases and growth. Academic,  
296 London.



- 297 Jennings, S.N., 2018. Advances in Rubus Breeding, in: Raspberry: Breeding, Challenges and Advances  
298 (Eds Graham J., Brennan R.) Pp 17–28. (Springer International Publishing, Cham, 2018).
- 299 Jones, A.T., McGavin, W.J., Geering, A.D.W., Lockhart, B., 2002. Identification of Rubus yellow net virus  
300 as a distinct badnavirus and its detection by PCR in Rubus species and in aphids. *Annals of*  
301 *Applied Biology* 141, 1–10. <https://doi.org/10.1111/j.1744-7348.2002.tb00189.x>
- 302 Jones, A.T., Roberts, I.M., 1976. Ultrastructural changes and small bacilliform particles associated with  
303 infection by rubus yellow net virus. *Annals of Applied Biology* 84, 305–310.  
304 <https://doi.org/10.1111/j.1744-7348.1976.tb01773.x>
- 305 Kalischuk, M.L., Fusaro, A.F., Waterhouse, P.M., Pappu, H.R., Kawchuk, L.M., 2013. Complete genomic  
306 sequence of a Rubus yellow net virus isolate and detection of genome-wide pararetrovirus-  
307 derived small RNAs. *Virus Research* 178, 306–313.  
308 <https://doi.org/10.1016/j.virusres.2013.09.026>
- 309 Kalischuk, M.L., Kawchuk, L.M., Leggett, F., 2008. First Report of Rubus yellow net virus on Rubus idaeus  
310 in Alberta, Canada. *Plant Disease* 92, 974–974. <https://doi.org/10.1094/PDIS-92-6-0974A>
- 311 Kumar, S., Stecher, G., Li, M., Knyaz, C., Tamura, K., 2018. MEGA X: Molecular Evolutionary Genetics  
312 Analysis across Computing Platforms. *Molecular Biology and Evolution* 35, 1547–1549.  
313 <https://doi.org/10.1093/molbev/msy096>
- 314 Langmead, B., Salzberg, S.L., 2012. Fast gapped-read alignment with Bowtie 2. *Nature Methods* 9, 357–  
315 359. <https://doi.org/10.1038/nmeth.1923>
- 316 Lockhart, B.E.L., 1986. Purification and serology of a bacilliform virus associated with banana streak  
317 disease. *Phytopathology* 76, 995–999.
- 318 Lu, S., Wang, J., Chitsaz, F., Derbyshire, M.K., Geer, R.C., Gonzales, N.R., Gwadz, M., Hurwitz, D.I.,  
319 Marchler, G.H., Song, J.S., Thanki, N., Yamashita, R.A., Yang, M., Zhang, D., Zheng, C., Lanczycki,  
320 C.J., Marchler-Bauer, A., 2020. CDD/SPARCLE: the conserved domain database in 2020. *Nucleic*  
321 *Acids Research* 48, D265–D268. <https://doi.org/10.1093/nar/gkz991>
- 322 Milne, I., Stephen, G., Bayer, M., Cock, P.J.A., Pritchard, L., Cardle, L., Shaw, P.D., Marshall, D., 2013.  
323 Using Tablet for visual exploration of second-generation sequencing data. *Briefings in*  
324 *Bioinformatics* 14, 193–202. <https://doi.org/10.1093/bib/bbs012>
- 325 Ndowora, T., Dahal, G., LaFleur, D., Harper, G., Hull, R., Olszewski, N.E., Lockhart, B., 1999. Evidence That  
326 Badnavirus Infection in Musa Can Originate from Integrated Pararetroviral Sequences. *Virology*  
327 255, 214–220. <https://doi.org/10.1006/viro.1998.9582>
- 328 Poudel, B., Wintermantel, W.M., Cortez, A.A., Ho, T., Khadgi, A., Tzanetakis, I.E., 2013. Epidemiology of  
329 Blackberry yellow vein associated virus. *Plant Disease* 97, 1352–1357.  
330 <https://doi.org/10.1094/PDIS-01-13-0018-RE>
- 331 Rajamäki, M.-L., Lemmetty, A., Laamanen, J., Roininen, E., Vishwakarma, A., Streng, J., Latvala, S.,  
332 Valkonen, J.P.T., 2019. Small-RNA analysis of pre-basic mother plants and conserved accessions

- 333 of plant genetic resources for the presence of viruses. PLOS ONE 14, e0220621.  
334 <https://doi.org/10.1371/journal.pone.0220621>
- 335 Shahid, M.S., Aboughanem-Sabanadzovic, N., Sabanadzovic, S., Tzanetakis, I.E., 2016. Genomic  
336 Characterization and Population Structure of a Badnavirus Infecting Blackberry. Plant Disease  
337 101, 110–115. <https://doi.org/10.1094/PDIS-04-16-0527-RE>
- 338 Stace-Smith, R., 1955. Studies on rubus virus diseases in British Columbia: Rubus yellow-net. Canadian  
339 Journal of Botany 269–274.
- 340 Stace-Smith, R., Jones, A.T., 1987a. Rubus yellow net virus, in: Virus Diseases of Small Fruits, USDA  
341 Agriculture Handbook No. 631. Converse, R H, pp. 175–178.
- 342 Stace-Smith, R., Jones, A.T., 1987b. USDA Agriculture Handbook No. 631 (USDA, Washington) 175.
- 343 Tamura, K., Nei, M., 1993. Estimation of the number of nucleotide substitutions in the control region of  
344 mitochondrial DNA in humans and chimpanzees. Molecular Biology and Evolution 10, 512–526.  
345 <https://doi.org/10.1093/oxfordjournals.molbev.a040023>
- 346 Thompson, J.D., Higgins, D.G., Gibson, T.J., 1994. CLUSTAL W: improving the sensitivity of progressive  
347 multiple sequence alignment through sequence weighting, position-specific gap penalties and  
348 weight matrix choice. Nucleic Acids Research 22, 4673–4680.  
349 <https://doi.org/10.1093/nar/22.22.4673>
- 350 Wight, H., Zhou, J., Li, M., Hannenhalli, S., Mount, S.M., Liu, Z., 2019. Draft Genome Assembly and  
351 Annotation of Red Raspberry <em>Rubus Idaeus</em>. bioRxiv 546135.  
352 <https://doi.org/10.1101/546135>
- 353  
354

355 **9. Tables**

356 Table 1. Description of the origin of the raspberry cultivars used as plants for Illumina sequencing and  
 357 method development in this study, or mined from published literatures, sorted by year of release, and  
 358 subsequent RYNV detection result\* using analysis of whole genome sequencing data and validated by  
 359 SYBR Green PCR detection. \*\*

|    | Cultivar names         | Year Release | Breeding Program | Endo RYNV -CU1 | Endo RYNV -CU2 | Endo RYNV -CU3 | Endo RYNV -BS | Endo RYNV -PH1 | Endo RYNV -PH2 | Fragment | Epi RYNV -BS |
|----|------------------------|--------------|------------------|----------------|----------------|----------------|---------------|----------------|----------------|----------|--------------|
| 1  | Yellow Antwerp         | 1802         | Belgium          | No             | No             | No             | No            | No             | No             | No       | No           |
| 2  | Cuthbert               | 1865         | New York         | Yes            | Yes            | Yes            | No            | No             | No             | Yes      | No           |
| 3  | Baumforth's Seedling A | 1880         | UK               | Yes            | No             | No             | Yes           | No             | No             | No       | Yes/No***    |
| 4  | Phoenix                | 1896         | UK               | No             | Yes            | No             | Yes           | Yes            | Yes            | Yes      | No           |
| 5  | Latham                 | 1920         | Minnesota        | No             | No             | No             | Yes           | Yes            | No             | No       | No           |
| 6  | St. Regis              | 1920         | New Jersey       | No             | Yes            | No             | Yes           | Yes            | No             | Yes      | No           |
| 7  | Lloyd George           | 1923         | UK               | No             | No             | No             | No            | No             | No             | No       | No           |
| 8  | Malling Landmark       | 1943         | UK               | Yes            | No             | No             | No            | No             | No             | No       | No           |
| 9  | Korbüller              | 1945         | Germany          | No             | No             | No             | No            | No             | No             | No       | No           |
| 10 | September              | 1947         | New York         | No             | Yes            | No             | Yes           | Yes            | No             | Yes      | No           |
| 11 | Mandarin               | 1955         | North Carolina   | No             | No             | No             | Yes           | No             | No             | No       | No           |
| 12 | Chilcotin              | 1965         | British Columbia | No             | No             | No             | Yes           | No             | No             | No       | No           |
| 13 | Southland              | 1968         | North Carolina   | No             | Yes            | Yes            | Yes           | Yes            | No             | No       | No           |
| 14 | Heritage               | 1969         | New York         | No             | Yes            | Yes            | Yes           | Yes            | No             | No       | No           |
| 15 | Malling Jewel          | 1980         | UK               | No             | No             | No             | No            | No             | No             | No       | No           |
| 16 | Titan                  | 1982         | New York         | No             | No             | No             | Yes           | Yes            | No             | No       | No           |
| 17 | Autumn Bliss           | 1984         | UK               | No             | Yes            | No             | Yes           | Yes            | No             | Yes      | No           |
| 18 | Summit                 | 1989         | Oregon           | No             | No             | No             | Yes           | Yes            | No             | No       | No           |
| 19 | Tulameen               | 1991         | British Columbia | No             | No             | No             | Yes           | No             | No             | Yes      | No           |
| 20 | Qualicum               | 1995         | British Columbia | Yes            | No             | No             | No            | No             | No             | Yes      | No           |
| 21 | Prelude                | 1998         | New York         | Yes            | Yes            | No             | Yes           | No             | No             | No       | No           |
| 22 | Polka                  | 2001         | Poland           | No             | No             | Yes            | No            | No             | No             | No       | No           |
| 23 | Octavia                | 2002         | UK               | No             | No             | No             | No            | No             | No             | No       | No           |
| 24 | Chemainus              | 2006         | British Columbia | No             | No             | No             | Yes           | No             | No             | Yes      | No           |
| 25 | Munger                 | 1890         | Ohio             | No             | No             | No             | No            | No             | No             | No       | No           |
| 26 | Willamette             | 1943         | Oregon           | Yes            | No             | No             | No            | No             | No             | Yes      | No           |
| 27 | Meeker                 | 1967         | Washington State | Yes            | No             | No             | No            | No             | No             | No       | No           |
| 28 | Glen Cova              | 1969         | UK               | Yes            | No             | No             | No            | No             | No             | Yes      | No           |
| 29 | Comox                  | 1978         | British Columbia | Yes            | No             | No             | No            | No             | No             | Yes      | No           |
| 30 | Glen Moy               | 1986         | UK               | Yes            | No             | No             | No            | No             | No             | Yes      | No           |
| 31 | Caroline               | 1998         | Maryland         | Yes            | Yes            | Yes            | No            | No             | No             | No       | No           |
| 32 | Cascade Bounty         | 2005         | Washington State | Yes            | Yes            | No             | Yes           | No             | No             | Yes      | No           |
| 33 | Joan J                 | 2005         | UK               | No             | Yes            | No             | Yes           | No             | No             | No       | No           |

360 \*: Yes = positive; No = negative.

361 \*\*: Samples 1-25 were plant samples in this study and validated using SYBR Green PCR detection, while  
 362 26-33 were data mined from the published literature and not subject to SYBR Green PCR. Further  
 363 descriptions are presented in sections 2.1 and 2.4.

364    *\*\*\*: Yes for the plant housed in Corvallis OR that has the episomal RYNV-BS; No for the plant housed in*  
365    *Watsonville CA.*  
366

367 Table 2. Percent identity matrix of the reverse transcriptase and RNaseH region of the six Rubus yellow  
 368 net virus (RYNV) lineages discovered in this study against the three published RYNV sequences,  
 369 *Gooseberry vein banding virus* (GBVBV), *Grapevine vein clearing virus* (GVCV), and *Birch leafroll*  
 370 *associated virus* (BLRaV).

|                        | endoRYNV<br>V<br>-BS | endoRYNV<br>V<br>-CU1 | endoRYNV<br>V<br>-CU2 | endoRYNV<br>V<br>-CU3 | endoRYNV<br>V<br>-PH1 | endoRYNV<br>V<br>-PH2 | epiRYNV<br>-BS<br>KM0780<br>34 | RYNV<br>-Cu<br>MN2452<br>40 | RYNV<br>-Ca<br>KF24195<br>1 | GBVBV<br>HQ8522<br>49.1 | GVCV<br>KT90747<br>8.1 |
|------------------------|----------------------|-----------------------|-----------------------|-----------------------|-----------------------|-----------------------|--------------------------------|-----------------------------|-----------------------------|-------------------------|------------------------|
| endoRYNV-<br>CU1       | 80.5                 |                       |                       |                       |                       |                       |                                |                             |                             |                         |                        |
| endoRYNV-<br>CU2       | 80                   | 82.5                  |                       |                       |                       |                       |                                |                             |                             |                         |                        |
| endoRYNV-<br>CU3       | 79.8                 | 90.3                  | 81.8                  |                       |                       |                       |                                |                             |                             |                         |                        |
| endoRYNV-<br>PH1       | 80.3                 | 90.3                  | 81.3                  | 88.5                  |                       |                       |                                |                             |                             |                         |                        |
| endoRYNV-<br>PH2       | 81.1                 | 87.1                  | 89.3                  | 85.2                  | 85.4                  |                       |                                |                             |                             |                         |                        |
| epiRYNV-BS<br>KM078034 | 78.5                 | 81.2                  | 79                    | 82.1                  | 84.4                  | 81.3                  |                                |                             |                             |                         |                        |
| RYNV-Chile<br>MN245240 | 79.7                 | 90.1                  | 81.7                  | 99.6                  | 88.3                  | 85                    | 82                             |                             |                             |                         |                        |
| RYNV-Ca<br>KF241951    | 80.5                 | 100                   | 82.5                  | 90.3                  | 90.3                  | 87.1                  | 81.2                           | 90.1                        |                             |                         |                        |
| GBVBV<br>HQ852249.1    | 71.1                 | 71                    | 71.5                  | 71.1                  | 72.1                  | 71.8                  | 71                             | 70.9                        | 71                          |                         |                        |
| GVCV<br>KT907478.1     | 67.7                 | 68.1                  | 66.7                  | 67.5                  | 68.4                  | 66.9                  | 68.5                           | 67.4                        | 68.1                        | 68.2                    |                        |
| BLRaV<br>MG6864191     | 66.9                 | 66.4                  | 65.4                  | 66.4                  | 67.3                  | 65.7                  | 65.7                           | 66.3                        | 66.4                        | 67.3                    | 69.8                   |

371

372 Table 3. Break points in the genomic sequence, and plant-virus junctions of the endogenous RYNV  
 373 lineages discovered in this study. Nucleotide positions relative to the corresponding RYNV genomic  
 374 sequence are shown within parentheses. Vertical bars indicate break/junction points.

| Lineage          | Break point | Nucleotide sequence                                                                                                                                                                                                                                                                                                                        |
|------------------|-------------|--------------------------------------------------------------------------------------------------------------------------------------------------------------------------------------------------------------------------------------------------------------------------------------------------------------------------------------------|
| endoRYNV<br>-CU1 | 6527 12     | (6390)GGCTTCCCAAGGAACTAGCGGAGCTCACGGCCGAACTGTCAAAGGAAGGGA CGAAGCCCTGGTGAACAA GGAGGTACAGAGGAACATCTCATGTTTCTCGAGACTGCCCTCTCCAAGCGGAGAAATCCGTGACTA(6527)   TAC(12)GCTCTGATACCA(1)(7268)GAAAAATGGCCGAAAACATGGATCAAACCTTCTAAGTGCCTCTTGAACA CTTAGAAGACATAAAATTCAGAGACAATGCGGAAGATAGAACTGAATAAACTCTTTATTTCTCAAGAAAGTTAATA CAATACAAGAGAAGGTT(7123) |
|                  | 15 815      | (132)TTTGACACAGACACTCACTCTTCCCTCCGAAAAAGAGAGCAAACCTCAAGGTTCTGGTCTGAAACTTGGGT TTCTCGACAAGAAGGAAAGTGTTTAAAGCTACCATGGTGAGAGCTA(15)TG   (815)AAGGCCACACAGTCAGCCCTGAAGCTAGGCTTCGCACAACTGCAGGA GGCAGTTTCAGCTGATCATCAAGG GAAAACGATCCCAAACCAATCGAAGCAGCTACTGCACAAGTAGCCGAA CAGCTGAGGAAGCAGCTTATTGAGGTC AAGTCCGTCCTCGAGGAGACCAAGAAGATCGC(993)       |
|                  | 767 1426    | (685)CTCCAGACTCACCCAGTACCTGACAACAAAGGTTGGTTCCTACCAACAATCCCGGAGGATTACCCCTCCTG GACCAAGCCA(767)   (1426)CAATACAATGAGCAGAAGCCAAACAAGGCTCCAGGCTCCGCCGCAACTGAAAGGG CAACAAGCAGCTCG GAATCAGGCACCCCACTTGGAGGACCAGATCCGAGGATACAGGCGCTCCGCAAGGTTACGACACCAGGC(1566)                                                                                    |
|                  | 2473 1321   | (2367)ACGAGGCAGAGGACGAGGAGGATCAGGAAAGTACAGGTGATAGGAGCTACCAACCATTGAGGAGCCAGA GA TGGAGTACCAACTAGGCTCGAAGAAGTTATGGGCAAG(2473)   (1321)CTCACTAAGGATTCGGAAGGTTCAACTTAGGGAAAAGGAAAGGGGATAGAAGGAGCAGTCTCATCCAGAG ACAAGAACTTCTACGTCTGGAAGAACCCCTTCAATCAATACAATGAGCAGAAGCCAAACAAGGCTCCAGGCTCCGC CCGCAACTGAAAGGGCAAACAGCAGCTCGAATCAGGCACCCCACT(1513) |
|                  | 7268 plant  | (7103)ATCGAGTAAGCTCAATAGCCAACCTTCTTGTATTGATTAACCTTCTTGAGAAATAAAGAGTTTATTTCAGTT CTATCTCCGATTGTCTCTGAATTTTATGTTCTTCTAAGTGTTCAAGAGCGCACTAAGAAGTTTTGATCCATGTTTT CCGGCCATTTTT(7268)   (plant)TGGTAACATCGACTAAATATTGTTGAAATAATCTCCACCTTTTAAACAAGATCTGTACTTTTATTCTGTCA TGGATTTGATGCAACAAAACCTTCGATTGACATTTTTTTCTTTTGATTCTTCATTT(plant)            |
| endoRYNV<br>-CU2 | 2217 5319   | (2087)TGGGCAGGTGGAGACAGCAATATGATCATCACCAGATCTCTGGTGGGACGATTGACTAACACCAGCATGA C CAACTTTGAGTACCGGATAGAACAAGTACAGACTACTGGCGAGCAATGGAGTCGCATG(2217)   (5319)ACTACTCAGAAGGAGGATGAGCAGCTGAGAAACCAAGCTGCTACAAGAACTGAAAGAGCAGGGATA CATCGGAGAAGAGCCCATGAAGCACTGGGCAAGAATGGGA(5429)                                                                  |
|                  | plant 1     | (plant)GAATTTAATTAGAGAAACAATTTAAACCATTCAAATTTTCATTACAATGCGTGTATATGTGAAAATAGGAAAA CTAGCAATAATTGGCACAAGGGGAGTTCCATAATTA(plant)   (1)TGGTAGATTGTACTTTAGCTCTATTCAACATGTTAGCTTAAACTTTTCATTTCTTGTGCGAAAACCAAGTTTCAGA CTAGAACCCTTGAGTTCTCTCTTTTTCAGGGAGGAGAGAGTAGTGAGCATTGCAAAAACCTTCTGCAACTTTCAAACC CCCATGAAAGCTTTCC(279)                        |
|                  | plant 188   | (plant)TAACATCCATCCTTGTAAAAATACTTGTATTCTTGCCTGATATTTTCTGATTTGAACTGTACAATCTGCT GTCCTGTTATTTGCCTAGCCAC(plant)   (188)TTCTGATTTTCACTAGTTCAAACCTACTGCTTAAACTGCAGGCTTAGGCGTCGAAGCGAAGTACCTTGTAGCC GTTAGCTGGAGTGCGTTAGGCGTTGATTGGGAAAACGACGTAAGAAGCAGCAGCAACTAGCAAGAAAACCT( 335)                                                                 |
|                  | 5863 plant  | (5738)GGCAACGCCAAAATCTTCAGCAAGTTCGACTTGAAGTCTGGTTTTCCACAGGTAATGGATGAAGAGTCC ATCCATGGACGGCGTTTGTACACCTGTAGGCTTCTACGAGTGGAAAGGTGATG(5863)   (plant)TCAGAAAATTGGCCGAACATAGGATCAAAAACCTTCTAAGTGCCTCTTGAACACTCAGAACTCATAAATT CAGAGAAAATTGGGAAGATAAGATGAACAAAAGCTCTTATTTCTCAAGATGTTAATAACAATTCAGAGAAGGTT GGCTATTGAGCTTACTCGATGCCTA(plant)        |

|                  |            |                                                                                                                                                                                                                                                                                                                                                   |
|------------------|------------|---------------------------------------------------------------------------------------------------------------------------------------------------------------------------------------------------------------------------------------------------------------------------------------------------------------------------------------------------|
| endoRYNV<br>-CU3 | 4550 4423  | (4434)AGATTGTTCTTCAGTTTTCCGCAATATCTCTCAGTTTTATGAGTTCCTAAGTGTCAAGAGCGCATTTAAGAA<br>TTTTTGATATTGCGGAAACTGAAGAACAACTTTATTTCTCT(4550)  <br>(4423)TGAAACGTTAATACAATACAGGAGAAGGTTGGCTATTGAGATTGCTCGATGCCTAAGCCTTCAGACTACACTC<br>CCTTATATAGGAAGTAGGCTAAGCAAAACGACAGACAACACTAGCTCGGGTGCCTTTCTGGGCCCCATC GACAG<br>CTAATAAGTTCTGCTTTACAGCTTTGCTAAAGCT(4242) |
|                  | plant 1    | (plant)TGCTAGCGTGCCAATATGATGAACTGAAGCTATGAACCTTTGCTAGTTGTGACTGAATTGTGGTACTTGA<br>TTTGGTTGAGGTTGTATTAGGATGGGTATGCCAGGTAGGGGAACTCTTGCAGTGAATAGCTACAGCAAGAGGA<br>AGTTGCAGCAAAATGCAAGACTCTTGCAGTGAATAGCTACAGCAAGAGGAAGTTGCAGCAAAATGCAAGAGGACC<br>TCTTGT(plant)   (1)ACAACGGTGTATGCTAGTCTACCGCAGGACTTCACCTTAGTCCCTGACGTGATCAACA(60)                    |
|                  | plant 1492 | (plant)AAACAAAAAATAATGTATGGTCCATTAGCCGAAATCAATTCTGCTGTAGGCATCATTTTGCCTGTGGGA<br>TCTGACTGATCTTGTCAAGTCTCTTGTGATAGCTCCAGTCAAACAC(plant)  <br>(1492)TCCGATTTGGAACAACGATTCCACCGATCACATCCAAAACCTTGAAAATGTAGCAAGGATGATCGAACAA<br>GGAAGGAAACCCCAAGGTAATCATCAAAGAAACAGCTGAGAGCAGCAGCAACACCATTGGAGCCCTTAGCA G<br>AAGAAGGAATAGAGGAGCTAGCCGAGCTGTA(1670)     |
| endoRYNV<br>-BS  | 7602 6317  | (7445)CCAAGCGCACCCGGGCTAATTTCTCTTGTCTTTAGCATAAGCCCCCTTCTATATAAGGAAGCTAAGTTAG<br>AAGGCTTAGGCATCGAGCAACCTCAATAGCCAACCTTCTCTTGAATATCAGTATTCAAGAAATTAGTATTCAAGAA<br>ATTAGTTG(7602)  <br>(6317)CTATCCCCTGTTCACTTGTCTTGTCTATACAGAGGCCAAGCAAGGTTCCGCATTTGGGAATGTAGTTTCTGG<br>CGTAGTTGAGGACTCTAGCCAGCTCTAATCCTTTGAGGGTCT(6199)                            |
|                  | plant 1    | (plant)TCAAATTTTGTGAAAAATTTGTAGAAGTGATCTACTCATGAATATTTAATACTGAACAGTTGATTTGTGCGAG<br>ATGTAATCGAAAAATAGATATCACAACCTAATCAAATAAATACTCATTTAAGTGAATTTTTT(plant)  <br>(1)TGGTATCAGAGCTTTAGCTCTTATTATGTCAGCTTAAACCTTTTTTCTGTCGAGAAACCAAGTTTCGGA<br>TCTGAACCTTGAGTTCTCTCTTTTTAGGAGGGTAGTGAGTAAGCCAGCTTTGCAAATTTCAAACCCCAAGGAAA<br>ACTTTCCC(161)            |
|                  | plant 1777 | (plant)AATTAAGTGATCGATTATCAGACCGAGAATTAATCTATTCATGGTTCAATAATCAGTCCGATAATATATATAT<br>ATCAATATATGCACTGATCAAACAATTA(plant)  <br>(1777)TTCAGGTACATTGAAGAATCCTCTTACCAAAGGCTAGCAGGAGAAGGCATGCAGTTTATACATGTAGGCATG<br>GCCATGGTAAGAATACAGATGCTGCACAGGACTGACGCA(1887)                                                                                      |
| endoRYNV<br>-PH1 | 335 5859   | (452)AGTCGCCGTTTCAAGTCTTTCCAGGAGCTACTCTTCTTCTGAAAGGCAGAGATTCGTGTGTTGCATCAAAA<br>CCACCAAGTCTAGCCGCTTACTAGCTTTCCGGCCGGTGTCTG(335)  <br>(5859)TCACCTGGTCAAATGGCTTCCAGAAAGAACTGAAGGATCTCGCGCCGAGCTAGCCAAGAAAGAGGCAA<br>GACCTCCCTGAAGGGAGAGGTGACAGGAGGATCTCTGTTTTCTCAGAACTGCC(5984)                                                                    |
|                  | 1373 1814  | (1215)GGGACTTCAACGGCAACTAGATCCGGATGCCGAGCTCTCTCAGCAGAAAGGGGAAAGCAACCTGTGA<br>CCAGCAGAGGTAACACACTGAAAGAAAGGACCATCCGAGCCAGAAGGAAGGCCAGAAGGAGAGGACGA<br>GAGCACACATTATG(1373)  <br>(1814)ATCCCCGAAAGAAAGAAAGAAAGTCTACCTCAAATATGAGGCAGAAAGCAGAAAGGAGGATCAGGAGCTT<br>AAGTATTGGAGCCACCACATAGAAGAGCCAGAAATGGAATACCAAAGGCTCAGGAAGTTATGGGC(1954<br>)        |
|                  | plant 1    | (plant)AAGGACGAGCTGATTTCAAGTGAATAAAGATTGTTTCATTTTTCTCCGCATTTTCTCTGAGTTTCATGA<br>GTTCTTAAGTGTCCAGAGCGCACTTTCGAATATTAGATCCATGTTTTTCGGACCCATT(plant)  <br>(1)TGGTATCAGAGCTTTAGCTCTACCATGTTAGCTTAAACCTTTTTCTGTCGAGAAACCAAGTTTCAGATCTG<br>AACCTTGAGCTTTCTCT(95)                                                                                        |
|                  | 6631 plant | (6542)GCTTAGCCTACTTCTATATAAGGGAGTATAGTCTGAAGGCTTAGGCACAGAGCAATCTTTAGCCAACCTT<br>CTCTTGAGTTGTATTA(6631)  <br>(plant)TATTCAACCTTCCCTAAACCTAAACCTAAACCTAAACCTAAAGCAGCAGGATGAGAGCTAAAGCTCT<br>GATACCAAGTGGGGTCCGAAAAACATGGATCTAATATTGAAAGTGCCTCTGGAACACTTAAGAACTCATGAAA<br>CTCAGAGAAAATGCGGAAGAAAATGATGAACAATCTTTATTTACCAAGTGAATCTGTTT(plant)         |
| endoRYNV<br>-PH2 | 2201 2432  | (1990)ACAATTGGTATACATAATACAAACGCAATGATGTCAATACAGATTTTTACAATTGTATACAGGTCAGCGTG<br>CAAACCGAGGCTACGGGACAGGATGGGCTGGAGGAGACAGCAGTATGATCATCACTAGATCACTGGTGGGCGT<br>CTCACCAACACCAGCATGACAAACTTCGAGTACCGGATAGATCAAGTACAGACTATCTAGCAA(2201)                                                                                                               |

|  |              |                                                                                                                                                                                                                                                                                                                                              |
|--|--------------|----------------------------------------------------------------------------------------------------------------------------------------------------------------------------------------------------------------------------------------------------------------------------------------------------------------------------------------------|
|  |              | (2432)AGCACGCACTACGTGCTCGTCTTCAGACATAACTCCTATGAGACCAACCTCAGAGGAGAAAGGAGGCCAAGGCAGAACGAACTTTC(2517)                                                                                                                                                                                                                                           |
|  | 7091   plant | (6970)GCAGAGATGGACGAGTCTAGAAGACTGGCCAAACAACGCCGAGACAAAGTCTTCGACGACG CAGG GCAAAACATCTGCGACACGGTCTACATCACCGGTGTCGACCTCGCCGCCGCCAAGGC(7091)   (plant)ACGCGGCCACATTTGCAGCCTTGGTGGTGATAGTTTTGACTGTTGCTTGCAATGCTCCACTTGCTAAGTTGCAACATAAGTTTCAGAGTAAAGCTTGTGGTGTCACAAGATGAAAAAGGCTCAAGGCTAGTTCTGAAGCTCTTGTAACA TGAAAGTATTTAAATTATATTCATGGGAA(plant) |
|  | 3094   plant | (2924)AGTGGCATGGATAGCGAGTCCAGCATCACAGGTGGAGGATTCATACCACCAAGCCAGTACCAGGAGCGCAGGGATACCCACCTGCCACAGGAGCGTCTGCTTCAACCATAGGGCCAGCAGATCTGCAAGGATGGGGAGGACGAT TGCCAAGGAGCAGATCGCCGATAGGA(3094)   (plant)AAATGGCCCAACATATAGATAGGAAAATGGCCCAACATATAGATCGAAAAATGTCTAAGTGCGCGCTTGAA CACTTAGAAACTCATAAAAACCTCAGAGAATATGCGGAAGATAAGATGAATAAACTCTT(plant)  |

375

376



377 Table 4. Primer pairs used for Rubus yellow net virus lineage-specific SYBR Green PCR validation.

| Lineage      | Primer name and sequence                                                       | Amplicon size (bp) | Melting temperature (°C) |
|--------------|--------------------------------------------------------------------------------|--------------------|--------------------------|
| endoRYNV-CU1 | endoCU1-6376F: CACTGTAGTAAGATGGCTTCCC<br>endoCU1-6475R: GTTCCTCTGTACCTCCTTGTTT | 100                | 80.99                    |
| endoRYNV-CU2 | endoCU2-2415F: CGGAAGAAGAAAGCACACATTAC<br>endoCU2-2527R: CTCTGGCGTGAACCTCTGAAA | 113                | 79.94                    |
| endoRYNV-CU3 | endoCU3-2450F: CACAAACTCAGGGACGTCTATC<br>endoCU3-2575R: ATCCCTGGCAAGGTGTATTG   | 126                | 79.15                    |
| endoRYNV-BS  | endoBS-4668F: CCTCCAGAACATCGAGAATGTC<br>endoBS-4767R: GCTAGGCATTTTCGTACCTATTA  | 100                | 77.57                    |
| endoRYNV-PH1 | endoPH1-2633F: GAGCTGTCGGAGAAGCTATTT<br>endoPH1-2725R: TATCGTCAACCCTGGGTATCT   | 93                 | 77.83                    |
| endoRYNV-PH2 | endoPH2-3892F: GTGCTACCTTTGCGGAATAGA<br>endoPH2-3989R: CTAAGCCCATGCCATTGAAATAC | 98                 | 79.02                    |
| epiRYNV-BS   | epiBS-2604F: TCCTACGAGGTAAGCCTAAGAG<br>epiBS-2715R: CCGAGTTTCGAGAGTTGGTTTAG    | 112                | 79.81                    |

378

379

380 **10. Figures**

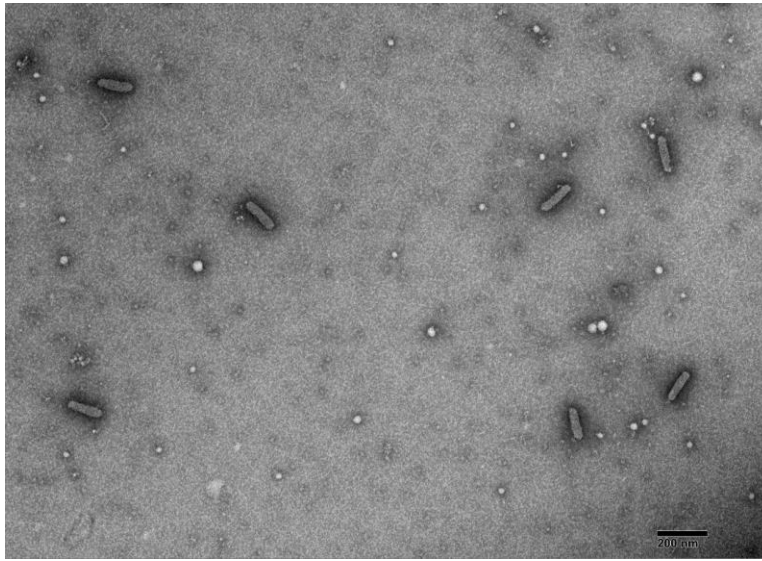

381

382 Figure 1. Bacilliform particles of rubus yellow net virus from 'Baumforth's Seedling A' (epiRYNV-BS)  
383 captured using antibody against sugarcane bacilliform virus and stained in phosphotungstic acid.

384

385

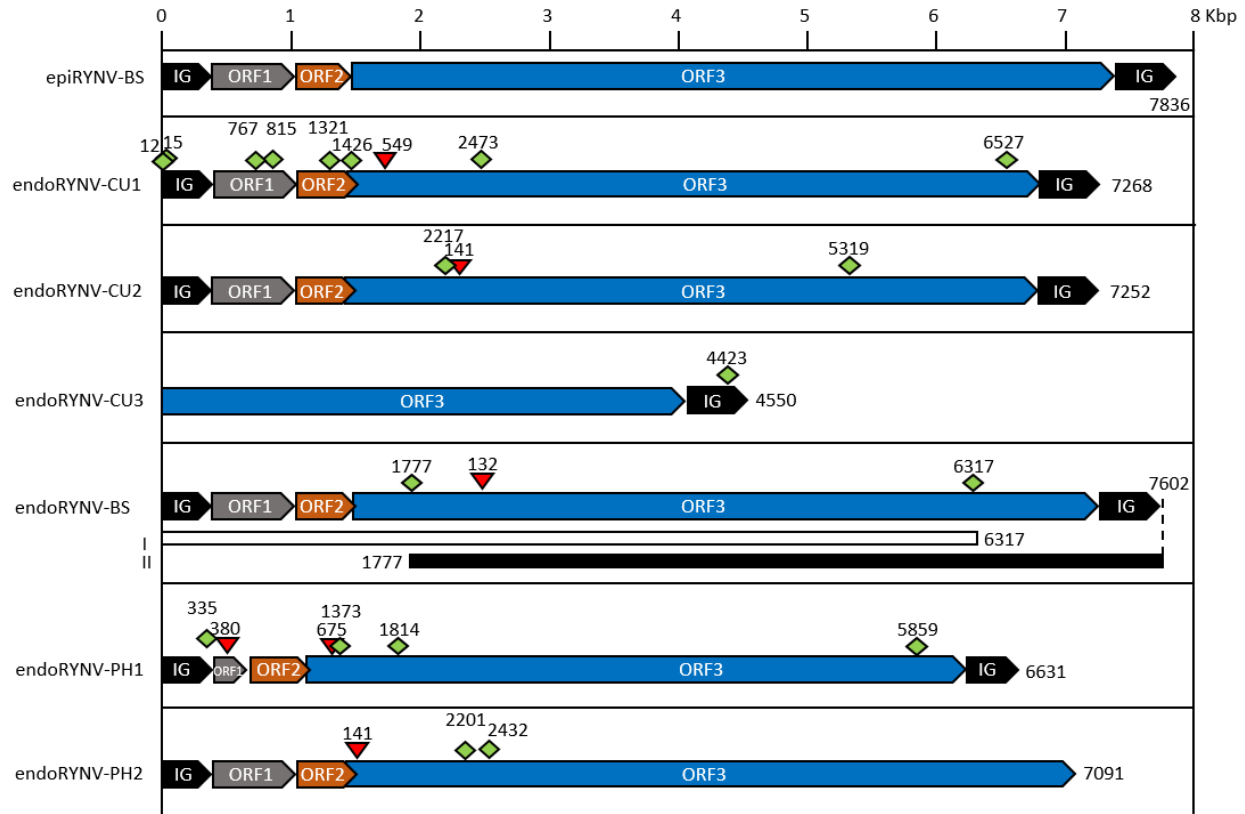

386

387 Figure 2. Overview of endogenous rubus yellow net virus (endoRYNV) lineage sequence structures in red  
 388 raspberry. The sequences are represented with intergenic region (IG) in black; grey, orange, and blue  
 389 boxes indicating ORF1, ORF2 and ORF3 of the virus, respectively. For simplicity, ORF4 and ORF6  
 390 embedded within ORF3 are not illustrated. Break points and deletions in the genomic sequence are  
 391 represented in green diamond and red triangle shapes, respectively, with nucleotide location on top.  
 392 The two fragments of endoRYNV-BS that were found in high-quality 'Joan J' genome are shown in high  
 393 and black bars.

394

395

```

endoRYNV_CU1      ACGTCTAGTGAAGTGACGCAATGAATGACTTCACAATTGCCAATGTCGTCACCTGCTTACG
RYNVCaKF241951   ACGTCTAGTGAAGTGACGCAAGGAATGACTTCACAATTGCCAATGTCGTCACCTGCTTACG
*****

endoRYNV_CU1      ACTTGGAACCTTATCGTTTTGTGTGCGGCAGCATCTCTTAGCTGTCAATTTGTGTGTAAGTGC
RYNVCaKF241951   ACTTGGAACCTTATCCTTTAGTGTGCGGCAGCATCTCTTAGCTGTCAATAAGTGTGTAAGTGC
*****

endoRYNV_CU1      GCGGCTAGTGCCTGTGTCAAGATAAGGAATCTTATCTCCTTATCTTTTGC--TTTGT
RYNVCaKF241951   GCGGCTAGTGCCTGTGTCAAGATAAGGAATCTTATCTCCTTATCTTTTGC--TTTGT
*** ***** ** *

endoRYNV_CU1      -AAAGCTA--GCTGTAAAGCAGATTCTCTTAGCTGTGATGGGGCCAGAAAGCGCACCC
RYNVCaKF241951   TAAAGTTAAAGCTGTAAAGCAGGACTAATTAGCTGCAGGTCA--TCAGGTTTGGCGTTGT
*** * ***** * * * *

endoRYNV_CU1      GAG--CTAGTGGTCATCTGTCTTTTGTCTTAGCCTCTCCCTATATAAGGGAGCTCAGT
RYNVCaKF241951   GGAACCTCTGCAGCTGACTGGTGAGCTCTTCGACTTTTCTAGTGAGGAAAGCGTTGTGCT
* * * * *

endoRYNV_CU1      TAGAAGGCTTAGGCATCGAGTAAGCTCAATAGCCACCTTCTCTGTATGTAT--TAA
RYNVCaKF241951   CATAGAGATGTCGTATAAGCTCATCTTTGTTGTGGTATTGCCACTTAGCTGCGTCCTTGG
* * * * *

endoRYNV_CU1      CTTTCTTGAGAAATAAAGAGTTTATTCAGT--TCTATCT-TCCGCATTGTCT-CTGAATT
RYNVCaKF241951   TGTCTTTGCGGCTATAAGCTTGATCCCATGATCCATGTATGCGCAAAGGGGACAGAGT
* *** ** * * * * * * * * * * * * * * * * * * * * * * * * *

endoRYNV_CU1      TTATGTTCTTCTAAGTGTCAAGAG---CGCACTAAGAAGTTTGTAT-CCATGTTTTC
RYNVCaKF241951   TGAGGTTGCAGGTGGTGCAGGTGACTCTTCGCCCATGAGGCGTTTCGTCGCTGCATATGC
* * * * * * * * * * * * * * * * * * * * * * * * * * * * *

endoRYNV_CU1      GGGCCATTTTTC-----
RYNVCaKF241951   TGCATATCCTCCCTTCGATCGGCACCTTCTTGTGTATCACTCCAGGCGTGAGTGCATTCCT
* * * *

endoRYNV_CU1      -----
RYNVCaKF241951   GCTGTGCCTTTGGTATCTCCTTCTTCTCCAGGAAGGTTTTC

```

396

397 Figure 3. ClustalW alignment of the 3' intergenic regions of the endogenous rubus yellow net virus  
 398 (endoRYNV) lineages Cuthbert and Canada (endoRYNV-CU1 and RYNV-Ca respectively. Although the two  
 399 lineages share 100% nucleotide (nt) identity at the reverse transcriptase and RNaseH domain, their 3'  
 400 IGs share 29% nt identity.

401

402

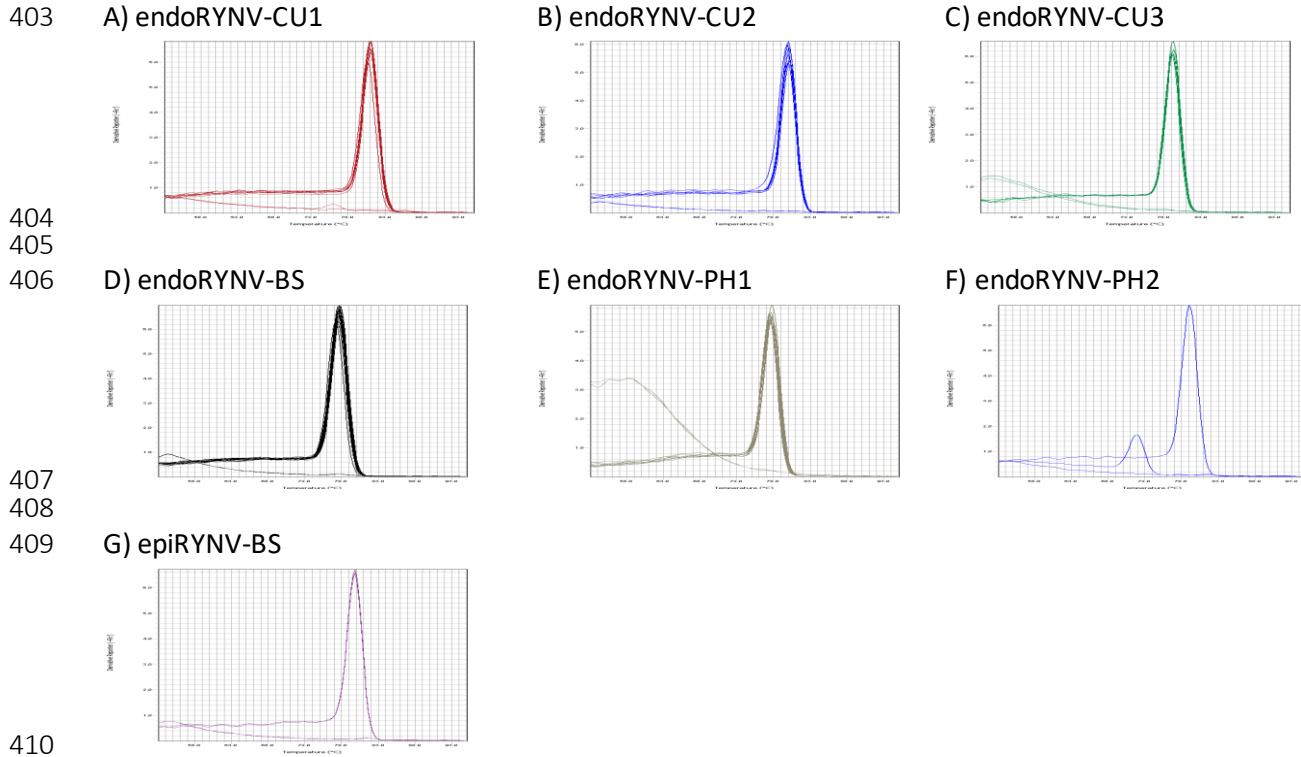

411 Figure 4. Melting curves for the lineage-specific SYBR Green PCR validation assays detecting the  
412 endogenous and episomal rubus yellow net virus (endoRYNV and epiRYNV respectively) lineages from  
413 the raspberry cultivars with corresponding endo/epiRYNVs. A) endoRYNV-CU1; B) endoRYNV-CU2; C)  
414 endoRYNV-CU3; D) endoRYNV-BS; E) endoRYNV-PH1; F) endoRYNV-PH2; G) epiRYNV-BS.

415  
416

417 (A)

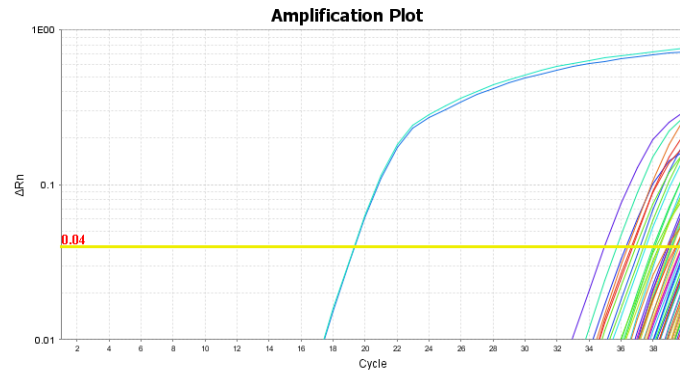

418

419 (B)

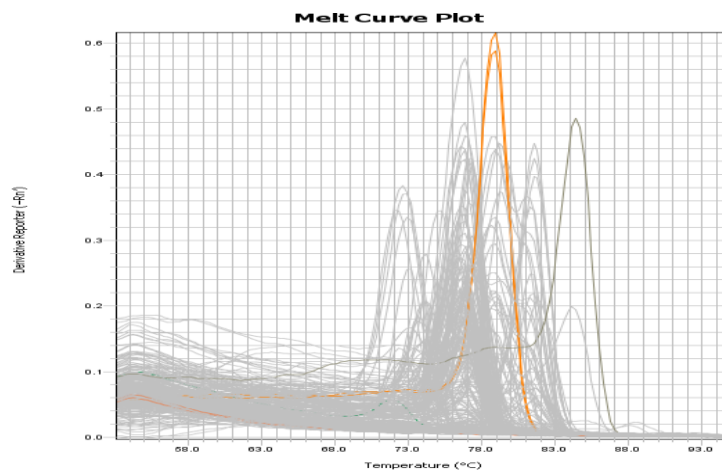

420

421 Figure 5. Detection of the rubus yellow net virus from 'Baumforth's Seedling A' (epiRYNV-BS) lineage  
422 using the epiBS-2604F/2715R assay against a panel of 271 public and proprietary genetics. The plants  
423 were as described in 2.5. A) Amplification plot (the epiRYNV-BS positive control from Corvallis, Oregon,  
424 with two replicates were labeled in blue and light blue); B) Melting plot (the two positive control  
425 replicates were labeled in orange with unique melting point compared to all other non-specific  
426 amplifications, labeled in grey). epiRYNV-BS was detected at Ct=19, whereas non-specific amplifications  
427 initiated after Ct=35 but their melting points were different from that of the positive control.

428

429

## 430 11. Supplemental data

### 431 *>endoRYNV-CU1*

432 TGGTATCAGAGCTTTAGCTCTACCATGGTAGCTTAAACACTTTCCTTCTGTGCGAGAAACCAAGTTTCAGACCAGAACCTTGA  
433 GTTTGTCTCTTTTTTCGGAGGGAAGAGGAGTGAGTGTCTGTGTCAAAACCTTCAAAGATCAAAACCCCATGAAAACCTTTCCTCA  
434 CGGTACCATAAGTTTTCTATCCTTCACTAGTTTGAACCTACTGCTCAAACCTGCAGGCTTAGGCGTCGAAGCGAAGTACCCTTGT  
435 GCCGTTAGCAGGAGGCGTTAGGCGTTGATTGGGGAAAACCTGACGTAAGAAGCAGCAGCAACTAGGCAAGAAAACCTGACGG  
436 GTAGATCACCGGCCGGAAGCCAGTAAGCGGCTAGATCTGGGCAGTTTTGATGCAACCTCACGAAATCTCAGCCTCGAAGAA  
437 GAAAGCAGCTCTGGGAAAGTCTGAACGGGCGTATCGACAAGACTTTTTATTAGAAAATCTCAGAAATCTCAGAAATCCACGTTGGGA  
438 GGCAATCAGAAAACACCTCTCTAGACTTTCCTTGTACCACTTCAACAACAACCGGACCAACAGTCCACCGCACTCTCTGC  
439 AGACAAGAGAACAGTAAGGATTTACATTTCTGGTAAACACCTGTTGATCTCAACATCAACCGAGATCCACAATCAGGCGATT  
440 CTGGACGATAAGATCTCAGACTCACCCAGTACCTGACAAACAAGGTTGGTTCACTACCAACAATCCCGGAGGATTACCCCTC  
441 CTGGACCAAGCCACAATATCCTTAGATCTTCAAGCCCTCAAGGAGATCTGAAAGAAATCAAGGCCACACAGTACGACCTGAA  
442 GCTAGGCTTCGCACAACCTGCAAGGAGGAGTTCAGCTGATCATCACAAGGGAAGAAACGATCCCAACCAATCGAAGCAGCTACT  
443 GCACAAGTAGCCGAACAGCTGAGGAAGCAGCTTATTGAGGTCAAGTCCGCTCTCGAGGAGACCAAGAAGATCGCGAGATCTC  
444 TGTCCCCGACGGATGAACCTAGGTGGCAGGATACTGCAACCAAGGAAACCTACCTCAAAGCCAACAAGCTACCTCATCTCT  
445 CACCTCCAACAACACAGGTCTAGGCTTCATCGAGCCACAACCTACCGGAGGACAGCTATCTCAACCTAGCAAAAAGAA  
446 ACAACACGCTCATCCAGCTGTTAGTTCAGGTGCTAGAAAAGAACCTCGACCTCGAGCAGGCAATTGTCAACCTCACAAGCTCAG  
447 GTCACAAGGCTAGAAAAGCCGTCTCGGAGAAAGACACAGTCAAACCTCCAGAAAGTGTCTCAACGACCTCACTAAGGAGTT  
448 CGGAAAAGTCAACTTAGGGAAAAGGAAAGGGGATAGAGGAGCAGTCTCATCCAGAGACAAGAATTCTACGTCTGGAAGAA  
449 CCCCTTCAATCAATCAATGAGCAGAAAGCCAAACAAGGCTCCAGGCTCCGCCGCAACTGAAAGGGCAACAAGCAGCTCGGA  
450 ATCAGGCACCCACCTTGGAGGACCAAGTCCGAGGATAAGGCGCTCCGCAAGTTACGACACCAGGCGCAGCGAGCAATG  
451 AGAAGGACCTTCACTAGGGACTTCAGAAAACCATAGAACGGCAACTAGACCCAGATGCCGAGCTTCCCTCAGCAGAAGAA  
452 GGAGAGTAAACCGAGTACCAGCAGAGGTATACAGATCCGGAGAATGGGATTTAACAACCCAGCAGGATCGTGGCACCCTAGC  
453 AGTCCCAACAGAAGCAAGGCTTAGCCAAAACAGGAATGGCAATATAAGCCTCAGATTCACCGACTTCCGAGATCAGAGGATC  
454 GTGGAGGAAGGAGAACCATCTGAGCCAGAAGGAAGGCCAGAAGGAGAAGATGATAGCAGCAGCTATGTGCTCATGTTCAAC  
455 CACTCAAGGTGGGACACCTTAGGGCAACCAAGCGGAAAATATGATTACATGGTGAGGTAATGATGCACCAGAACTACCGCAT  
456 GGCCAAACATCCAACATCGGATGGGATGATGATAAGCCACCCAACCGCCAAAGCCCTACAAAAGGATCTTTTGGGTAACCTC  
457 AAAAGGAGAGAAGAACTAAAAGAGAAGGAACCTCGCGAGTTCACACCGGAGACAGATCTGGTGAGCCAGTGGTTAAGTCAG  
458 CTGTCAACAATCCGCACATAATAGCGGAGCCTCAAGTTCAAGCAGAAGAACCAAGTTTCAGCAGGCGAGGACGAAAGACGATG  
459 TGTACAACAGCAACCTGGCAAAAGGAAGACAAGGAGAAAAGAGACCTGGAACTACAGGGGTGGAAACCACCGGGAGAC  
460 CAGGAATCTACGAGATGATCCCCGAAGAAGAAGAAGAATCTACCTCAGGTACGAGGCAGAGGACGAGGAGGATCAGGAAG  
461 TACAGGTGATAGGAGCTACCACCAATTGAGGAGCCAGAGATGGAGTACCCAACCTAGGCTCGAAGAAGTTATGGGCAAGCTCAA  
462 AAACGTGAGCATGGAAAACTGTTCCAGTAAGCGGAAATGGACAGCGAATCCAGCATCACAGGTGGAGGATTCAATCCACCA  
463 AGCCAGTGCCAGGAGCAAAAGGTAACCCACAGCAACTGGAGCATCCGCTCCACCATTTGGACCAGCAGACATGCAAGGAT  
464 GGGGAGGACGGCTACCTCGGAGCAGGTGCCTATAGGCTATGGCAGACCCCAACAACCGTGGTCACTGCCCTCAGCACAGTC  
465 TGATAACGGCTGCATGCTAGTCTTCCACAGGACTTACCCTAGTCCCGACGTAAACAAGATGGGAATCCATCAAGTCAA  
466 CCTCATCAACAAGATGATGTTTATTCCCTACAGGACAAGGCGGACTACGTAGAAAACCTCCTTGGAGAAAAGAAAAGGAG  
467 ACATGGATGACATGGAGAATGAGTACGAGGAAGAGTACAGGCAACTCCTACCATGAGCGGAGACGTAAGGAACCTTACTG  
468 CCGCAGTCAAAAAGGCTTTGGAGTACAGACCCGCACACAGGATCAGTACACATCCAGAATCAAGCGTACGAGAGCTGGA  
469 ACGCCTCTACTGAAAAGAACGGATGATGTGATCCCTTCTCTACGACTACTACCATGTTAGCAGCCAAGTCAGGAAGGATGT  
470 GGCTCGGACCTGAGCTATCTGAGAAGCTGTTCAAAAAGCTTCCACCGGAGATAGGCCCAACAATAGAGCAGGCTATAAAGA  
471 CAGGATCCAGGCCTCAGATTGGAATTTGGCAAGGGCAATTTTCATCCTGGAATATCTCAAAAACGTCTGCAAGCAAGCAG  
472 CGTTGCAAAAGGTCCTAAAAGCCTGAGCTTCTGCAGAAACATGCCAGTACCAAGGTAATCAGAGAAAGCAATACGGCAT  
473 CAGAAAAGGCTAAAACCTATAAAGGAAAGCCTCACCTACCCAAGTCAAAAAAAGTACAAGCACACATCTGGGA  
474 AGAAGTGCAAATGCTACTTATGTGGGATAGAAGGCCATTACGCCAGGGAATGCCAAAGAAAAGTGGTGAAGCCACAAAAG  
475 CGGCATACTCAATGGCATGGGACTAGACGACAACCTGGGATGTCGTGTCCGTGAGCCCGGAGAAATCAGATGACGATGAAAT  
476 CTGTAGCATCTCCGAGGGAGAAAACGCTGGAGGAATGCATGAGCTTATGGCATTCAAGACTCAACTCCCATACCCAGTGGAGT  
477 ACGAAGCCAGCACACCACAGTTTCTGATGCCATGGACACAAGTAAAGTGGAAAGAAAGCGAAAAACCTTCTGGAGAAGAAG  
478 GAAGGAAATCCCGAAGGCACAACAGGATTGTAATCACCTGGAGTGCACACAAGAAAGTGCTATCGAGGGAAAGGATATGC  
479 AGCATATGAGTATGAAACCCCTCATGGGCGAAGGATCACCTGCACCACTGCAGCCTTAACCTCTGTCCGCTTTCGCTTAC  
480 ATGGATCATGGGATCAAGCTTATAGCCGAAAGGACACCAAGGACGCAGCTAAGTGGCAATAACACAACAAGATGAGCTTA

481 TACGACATCTCTATGAGCACAAACGCTTCTCTACTAGAAAAATCGAAGAGCTCACAGTCACTGCAGGAGTTCCACAACCGCA  
482 AACCTGATGACCTGATCAGCTTAGCGGATGACTTGGAGGACGTGTCCATTCGGACAAACGCTCAAAGGGGGAAGGAGAA  
483 GGAATCTTTCAATTCGGAACAACGATTCCCATCGACCACATCCAAAACCTGGAAAAATCGGGCAAGGATCATCGAGCAATGGA  
484 AGGATACCCCAAGTAATCAACAAGAAACGCTGAAAGCAGCAACAACCCATCGGAGCCCTCTAGCAGAAGAAAGGAAT  
485 AGAGGAGCTAGCCGAGCTGTAGACACGGCATAACAGAAATGCCAAAAGGAGGATTGAACAAGCTCAACAACCCATTGTT  
486 GAGTTTGTAAATCCCAAGAAAAAGGGGACCCACCAGTTTCAAGGTAAGAGCTGTAATAGACACAGGATGCACCTGTACAT  
487 GTATCAACAGCAAGAAAGTCCCAAGAAAGCCCTGGAGGAAGCGAAGTACCAAGTGAACCTCGCAGGAGTAAATCCACTGG  
488 AGAAACGAAGCTTAAAATGAAGAACGGTAAGATGATCGTGTCTGGAAGCGATTCTATAACCGTACATTGCAGCCTTCCAA  
489 TGGAACTACAGACGTAGACATGCTCATCGGCTGCAACTCTTGCAGCCAAGAGGGAGGAGTCAAGGCTGAAGGTAAGTGA  
490 AGTGACGATCTACAAGAAAGTCAACCAATCCAAAACAACCTGGAGCCCAAAAGATACTCTGCTCCGCGCAGAAGCAAG  
491 TCGGAGAAGAGATCGAGCGTATGTACTACGCAAATGACTACTCTGAAGAGGATCAGTCCGCTGAGAAACCAAACTGCT  
492 GCAGGAACTAAAAGACAAGGCTACATAGGCGAAGAGCCAATGAAGCACTGGGCGAAAAACGGGATCAAGTGTAAAGTCTGA  
493 CATCAAGAACCCAGACATAGTAATCAGCAGTAAACCCCGGATGCTGTCTCAAAGGAGACGAAGGCACAATACCAGCGGCAC  
494 ATTGACGCTCTCTGAAGATCAAAGTAAATCCAGCCAAGCAAGAGCAAGCAGAACCAGCAGCTTCATCACAAAATCGGGCAC  
495 AACCGTTGACCCGATCACAAAGAAGAAATCCGAGGAAAAAGAAAGGATGGTGTTCGACTACAGAAGTCTGAACGACAAACCC  
496 CACAAAGACCAGTATACTTTGCCCTGGGATCAACAACATCATATCGGCAATCGGCAATGCGAAGATCTCAGCAATTTGATCTG  
497 AAGTCTGGATTCCACCAAGTATTGATGGACGAAGAATCCATCCCGTGGACCGCATTTGTCAACCCAGTAGGGTTCTACGAGTG  
498 GAAGGTAATGCCTTTCCGACTCGAAAACGCTCCGGCCGCTTCCAAGAGAAAGTGGACCAGTGTTCAGGAACCTCAGAGT  
499 TCATAGCCGTCTACATCGACGATATCCTGGTCTCAGCAAGACCTTGAAGGAGCACGAAAAGCACTGAGCATCATGCTTGGG  
500 ATATGTCGAGACAACCGCTGGTTTTGTACCAAGCAAGATGAAGTTAGCAGCAACCCAGATCGACTTCTTGGGAGCCACCAT  
501 TGGTGACGGAAAGATTAACCTCAACCTCAATAATCAAGAAGATAGCTGAGGTGGACGATGAATCTTAAAAACCTCAAAG  
502 GGTGAGAAAGTTGGTTGGGAGTTCTCAACTATGCCAGGAACACTACCCGAAGTGCAGAACACTCTAGGCCCACTATACAGC  
503 AAGACCAGTGAGCATGGAGACAGAAGGTGGCATGCTTCGGAATGGGCTTAGTAAAGAAGATCAAGAGCCTGGTCCAAAATC  
504 TCCAGACCTCAAACCTGCCAGTGAGGAGGCTATATGATCATCGAGACAGATGGTTGTATGGAAAGGATGGGGCGGAGTCTG  
505 TAAGTGGAAAGCCCAACAAAGCAGACTCAGCTGGCAAGGAAGAAATCTGCGCTTACGCAAGCGGTAAGTTCCAAACGGTGAAA  
506 TCTACCAATTGACGAGAAATCTTCGCGGTAATGGAGTCTTAGAAAAATTTCAAATTTTCTACATGAATAAGGACGAGATCACC  
507 ATCAGAAACCGATTGCCACGCCATCATCACCTTTTACGAAAAGTTAAACGCCAAGAAACCTTCTCGGGTAAGGTGGTTAGCTTTT  
508 TGTGATTAATAACAAACTCAGGGGTGAAGATGAAGTTCGAACACATCAAAGGCAAGATAATCAGCTCGCTGACAATCTTAG  
509 TCGCCTTACCAACTCATACTGTAGTAAGATGGCTTCCCAAGGAAGTACGCGGAGCTCACGGCCGAACTGGTCAAAGGAAGGG  
510 ACGAAGCCCTGGTGAACAAGGAGGTACAGAGGAACATCTCATGTTTTCTCGAGACTGCCCTCCTCAAAGCGGAGAAAATCCGTG  
511 ACTACTCGCCATCAGAGCCGACCATGTAATAAGGCGGAGATGGACGAATCCCGAAGAGTGGCCATGCGAGCAAGAAATCAA  
512 GGTCTTCGACGATCTTGACAAAAATCAGCGACGCCGTATACATCAGGCATCGACCTCGCCGCGCAAGGCACGGGCAA  
513 CCAGAGAACTGGTACAATGACGTCAACCCAGCATTGGAAGAACGAGCAGCTGCAGCATGGAGACTCATGGCGGCCTACTC  
514 AGACTTCGCCACGTGGAAGGACGTAACCGTCTAGTGAAGTGAAGCAATGAAATGACTTCACAATTGCCAATGTCTGACTGCTT  
515 ACGACTTGGAACTTATCGTTTTGTGTCGGCAGCATCTTAGCTGTCAATTTGTGTGTAAGTGCAGCGGAGTGTGCGTGTGTCAG  
516 GATAAGGAATCTTATCTCTTATCTTTTTGCTTTGTTAAAGCTAGCTGTAAAGCAGATTCTTATGCTGTGATGGGGCCAGAA  
517 AGCGACCCGAGCTAGTGGTCATCTGCTTTTTGCTTAGCCTCTCCCTATAAAGGGAGCTCAGTTAGAAGGCTTAGGCATCG  
518 AGTAAGCTCAATAGCCAACCTTCTTGTATTTGATTAACCTTTGAGAAATAAAGAGTTTATTCAGTTCTATCTTCCGATTGT  
519 CTCTGAATTTATGTTCTTAAAGTGTTCAGAGCGCACTTAAAGAAGTTTTGATCCATGTTTTCGGGCCATTTTTT

520 **>endoRYNV-CU2**

521 TGGTAGATTGTACTTTAGCTCTATTAACATGTTAGCTTAACTTTTCAATTTCTTGTGAGAAACCCAAGTTTCAGACTAGAACCT  
522 TGAGTTCCTCTCTTTTTTCAGGGAGGAGAGAGTAGTGAGCATTGCAAAACTTCTGCAACTTTCAAACCCCATGAAAGCTTTCC  
523 TCACGGTACTATAAGCTTTCTGATTTTCACTAGTTCAAACCTACTGCTTAAAATCGAGGCTTAGGGCTGGAAGCGAAGTACCCTT  
524 GTAGCCGTTAGCTGGAGTGCCTTAGGCGTTGATTGGGGAAAACGGACGTAAGAAGCAGCAACTAGGCAAGAAAATCTG  
525 CAAATCAGATCACCGCCGAAAGTCAAGTAAAGCGCTAGATCGGGGAGAAAGCGGATGCAACCTCAGAAATCTCATCTTT  
526 GAAGAAGAGAGCAACTCTTGGGAAAGTCTGAACGGGCGTATCGACAAGACTTCTTATTCAGAAATCTTATGATCTATCCGAG  
527 GTACGAAGCAAACAGAAAACCTTCTGTGATTTCCCTTGTATCACTTCAACACAACCACTGGACCTCCAGTCCACCAGCAG  
528 ATCTGCAAGCAGAAGAACAGTGAGGATTTACCCTACCTGGTAAATAACTGTTTGAATCACTCACTGAGATCCACAACCCAG  
529 GCAGTCTAGACGACAAAAGTCTCGAGACTCACACAGTACCTGGTCAAGAAAGTCCGAAACGCTACCGACAATCCCGGAGGACT  
530 CACCCCTCTGGACCAAGGTTCCATAACCTAGATCTGACGGCCCTAAAAGCAGATCTGAAAAGAGTCAAGGCAACCCAGTCC  
531 GCACTGAGGTTAGGCTTTGAACAGCTAAGAGAAGCTGTCCAGCTAATTCATTCGCCGCAAAACGATCCGAAAGCCATCGAAGC



532 TTCTACGGCACTCGTAGCGGAGCAGCTGAGGAACTGATAGAGGTGAAA TCTGTCCTCGAGGAGACAAAGAAGATCGCC  
533 AGATCTCTCTCCCCTGACGGATGAA CCCAAAGTGGCAGGAGACCGCCGCAAAGAAACCTATCAGAAGGCTATCCAGGCAAC  
534 CTCCTCGCTCATCAACAACACCGGTCTAGGGTTCA TAGAACCTCA TACTTACACCGGAGGACA ACTGTCCACAACCTAGC  
535 AAAGCAGAACAACACGCTCATA CAGCTGTTGGTCCAA GTGCTAGAAAAGAA TCTGGACCTTGAACAGGCGATAGCAAACCTAT  
536 CAGCACAGGTCACCAGACTCGA GAAGACCGTCGCAGAGAAGGACACGGTCAA ACTCCCAGGAAAAGCGTCTGAA CGACCTCAC  
537 CAAAGAA TTCGGGAAGTCAA TCTCGGGAAA GGA AAGGGTTTAGAAGGTA TTGTCTCTTCAAAGACAAA ACTTCTACGTTT  
538 GGAAGAACCCTTTCAACCA GTA CAATGAGCAGAAGCCAAA CAAGGCTCCAGGCTCCGCCCCGCAACTGAAAAGGGCAACAAGCA  
539 GCTCGGACTCAGGAACCCACCCTGGAGGACCAGATCCGAGGATATA GACGCTCTGCAAGGTTAAGACACCAAGCACAGCG  
540 AGCAGTTGCAAGGACCTT CAGCAGGGACTT CAGGAATACTATA GAAAGGCAACTGGACCCAGATGCCAACTCTCCCTTAGTA  
541 GGAGAAGAAGAGCGAA TCTA GTACCA GCAGAGGTA CTCTATGCTCACAACGGTTCGGAAACCAGCGAATCGTGTGTACGAGCA  
542 TTACAGTGAGCTCGGGGCCACATA GTCGACAGGCAACAAGACTTCCGGTATATAGAGGAAGCCTCTACAAAGGCTAGTCA  
543 GGGAAAGGCATGCAGTTCA TTCATGTCTGGGATGGCCATGGTCA GGTCCAGATGTTGCATAGAACGGATGCGGGGATATCCGC  
544 ATTAGTGGTGTTCAGAGACACCAGGTGGAGTGATGACAGGCAAGTCATCGGGAGCATGTCCGTGGACATGACAAGGGGAGC  
545 ACAGTTGGTGTATATAATACCCAACGCAATGATGTCAGTACACGATTTCTACAATCGTATACAAGTAAGTGTGCA GACCCGAG  
546 GCTACGGGACAGGATGGG CAGGTGGAGACAGCAATATGATCATCACCAGATCTCTGGTGGGACGATTGACTAACCCAGCAT  
547 GACCAACTTTGAGTACCGGATAGAACAAAGTACAGACTACTTGGCGA GCAATGGAGTGCATGCATACCCGGACAGAA GTGG  
548 GACGTA GCCAATCGATCCGGAGAATGGGAACTTCA ACCCAGCAGGATCA CAGCGCCAGTCATGGCACCTACTGAGGCAAGGT  
549 TGAGCCAGAACAGAAATGGCAGCATAAGCCTCAGATTCTCAGATTTCCGAGATCAGAGAATCACAGAAGA AAGGCCAGCTGA  
550 AGAAGAGGGCAGGCCGGAA GAAGAAA GCACACATTA CGTGCTCAT GTTCCGTCACAGCTCTACGAGACCAATCTCAGAGGA  
551 GAAAAGGAGGCCAAGGCAGAGTGAGCTTTCAGAGTTCACGCCAGAGACAGATCTGGTAAGCCAGTGGCTGAGCCAACTATCA  
552 GCCTCAGCACACAACAGTGGAGCATCTAGTTCA GAAGACGAACCCGCCAGGTTTGTGACTCTGAAGAAGATA GTGACAACA  
553 CCTATAATGAGAAGACTGGCAAAGA GAAGACCA GGA AAGGCCGAGATCTGGA GCTG CAAGGATGGAA GAAGACCA GCAGA  
554 CCAGGAATCTATGAGCTGATCCCAGAGGAAGGAAGAAATCTA CCTCAGGTATGAAGATGAAGAGGATCAGACAACAACAC  
555 AGGTAATCGGGGCAACAACCA TGGAGGAACCA GAGATGGAGTACCCTACCAGGTTGGAGGAAGTGTGGGAA GACTCAAAA  
556 ACGTTAGCATGGAGAAGCTGTTCCAGTTA GCGGCATGGATAGCGAGTCAAGCATCACAGGGGGAGGCTTTATCCCAACAG  
557 CCCAGTACCAGGAGCGCAGGGTTACCCACCTGCAACAGGAGCATCCTTTGGCTCGACAATTGGGCCAGCAGATCTACAAGGAT  
558 GGGGAGGTAGGCTGCCACGCAGCAGATCACC ACTTGGATATG GCCCGCCACAGCAGCCATGGTCATTACCATCCGCCAATCT  
559 GAGAACGGATGTATGCTAGTCTCCACAGGACTTCA CTCTAGTCCCAGATGTAATAAACAGATGGGAATCCGTAAC CGTCAA  
560 CCTTATCAACAAGATGATGTTGACTCCTTACAAGATAAGGGCGGATTACGTGGAAAATCTCCTAGGAGAACGGGAGAAAGGAG  
561 ACATGGATGACCTGGAGGATGCAATATGAAGAAGAGTACAAGCAGCTCCTCACCATGGCAGGAGACGTGAGAAATCTCACGG  
562 CAGCAGTCAAGAGGGTCTTTGGAGTGCATGACCCCATACAGGATCAGTCCACATACAAAA CCAGGCATATGCAGAACTGGA  
563 GAGGCTCTACTGCAAGAGAACGGACGCAGTGCATCCCTTTCTATGACTACTCAACTGGCGGGCAA TCTGGAAAGATGT  
564 GGCTAGGGCCAGAATTA TCAGAAAAGCTGTTCCAGAAAGCTGCCACCAGAGATAGGCCAACGATTGAGCAGGCTATAAAGA  
565 CAGGATCCAGGGCTGACAATTGGAGTCTTGGCGGAGCCA ACTTACTGAGTACCTACAGAATGTCTGCAAGCAGGCA  
566 GCGCTACAGAGGCTTTGAAAGAGCTCAGCTTTGTGA ACCATGCCGGTGCCAGGGTATTATGAGAA GAAGCAATACGGCAT  
567 CAGGAAGGC AAAAGACCTACAAAGGGAA GCCACACCCACACA TGTAAAGGTAA TCAAGAACAAGTA TAAACTCCGCAGGG  
568 AGGAAATGCAATGTTACCTTTGCGGGATAGAGGGTCACTACGCCAGGGAATGCCAAAAGCAAGTGGTTAAGCCACAGAGAG  
569 CAGCATTCTTAAATGGCATGGGCCTTGATGATAACTGGGAGCTCGTGCCGTGGAGCCAGGAGAGACAGATGATGATGAT  
570 CTGCAGCATCTCAGAAGGCAGGGCACCGGGGGATGAACGAGCTACTTGCAATCAAGACACAGCTCCCCTACCCAGTAGAA  
571 TATGAGGCGAGCTACTCTCAGCAGTCTGCCATGGATTCAGGTA ACTGTA CAAAGAGTGAAGAAACCTCATGGAGAAGAA  
572 GGAAAGAGATCCAACCGGCA CAA CAAGAATGC GCTCACCTCTGGAGCGATACAAA GAAGTGCCTATAGAAGGAAGAA TTTG  
573 CAGCATCTGCAGTGACGAAAACCCCTCTGGGAAGAAAGGATCACCTGCACTGCCTGCAACCTAATCTGTGCTCTTTGCGCATA  
574 CATGGACCATGGTATCCA ACTGATAGCCGCAAAGGACACCAGAGATGCAGCAAAATGGCAGTACCACAACAGGATGAGCTA  
575 ATCCGGCATCTCTATGAGCATAATGCTTTCTTAACCA GAAAGGTGGAGGAGCTGACAAGCCAGCTGCAACAATGGCAAAAACCG  
576 CAAACCAGAAGACCTTATCAGTCTTGC GGATGAGCCAGAGGACGTGTCCATCTGGACAACGCCTCAAAAACCGGGGGAAG  
577 GAGAAAGGATCTTTCCAATTTGGAACAACAATCCCAGTGCATCATA TACAAAACATCGAGAA TGTGGCAGAATGATCGAACA  
578 ATGGAA GAACACCCCAA TGTCAGGTCAAAGAAGTGGCAGAATCAAGCAGCAACACATA GGA GCACTCCTTGAGAAGAA  
579 GGAATTGAAGAGCTCGCGGCTCAGTAGATA CGGCATACACTGAAA TGCCGAAAGGAGGGTTGAA CAAACTCTACAACCA  
580 TCGTAGAATTTGTGATACCACAGGAAAAGGGGGCACCTCTAGATTCGGGTG CAGAGCTGTCATTGACACAGGATGCACTTGT  
581 ACCTGCATCAACAGCAGGAA GGTCCGAAGGAAGCTCTCGAGGAAGCGAAGTTTCAGATGAATTTCCGGGGGTAAACTCCA  
582 CGGGAGAAACAAAGCTGAAAATGAAGAATGGCAAATGATAGTATCAGGGAGTGATTTCTATACGCCATACATCGCGGCTTT  
583 CCCATGGA ACTACCAGATGTGGACATGCTCATTGGCTGTA ACTTCTTACGAGCCATGAAAGGAGGAGTCACTTGAAGGAA  
584 CAGAAGTAACCATCTACAAGAAGTTACCA CAATCCAGACGACTCTAGAGCCACAGAAGATCTCTACTCCGTGCAGAGGCA

585 GAAGCAGGGGAAGAAAATTGAGAGACTCTACTATGCCAATGACTACTCA GAAGAAGGAGTAAGCAGGCTGAGAAACCACAAG  
586 CTGCTACAAGAAGTCTGAGAGAGCAGGGATACATCGGAGAAGAGCCCATGAAGCACTGGGCAAAGAATGGGATCAAGTGCAAA  
587 CTTGATATCAAAAATCCCGATATAGTTATCAACAGCAAGCCTCCGGATGCAGTGTCTAAAGAGCGAAGGGCGCAGTACCAAAG  
588 GCACATCGATGCTTTACTGAAGATCAAGGTGATTCAACCCAGTAAAA GTAAGCACCGAACAGCAGCCTTCATACCAACTCGG  
589 GTACCAGCATAGACCCGATAACAAGAAGGAGATCCGAGGAAAAGGAGAGGATGGTCTTCGACTACAGGAGTCTGAATACCCA  
590 CAAGGATCAGTACACCTTGCTGGGATAAA TACCATCATCTCTGCAATTGGCAACGCCAAATCTTCAGCAAGTTCGACTTGAA  
591 GTCTGGTTTTCA CCAAGTACTAATGGATGAAGAGTCCATCCCATGGACGACGTTTGTACACCTGTAGGCTTCTACGAGTGGAA  
592 GGTGATGCCTTTCGACTCGCGAACGCTCCAGCAGTATTCCAAA GGAAGATGGATCAGTGTTCGAGGAACCTTTGAGTTCA  
593 TAGCCGTATACATAGACGACATCCTAGTGTTCAGTAAGACACTCAAGGAACATGAGAAGCATCTCAGTATAATGCTGGGAATA  
594 TGTCGTGACAACGGCCTAGTACTGTCGCCAAGCAAGATGAAACTGGCAGCAACAGAAATTGACTTTCTGGGAGCAACCAATTGG  
595 CGATGGGAAGATTAAGCTCCAACCTCATATCATCAAGAAGATAGCTGAGGTGGACGACGAGTCTTTAAGACTCTGAAAGGAC  
596 TAAGAAGCTGGTTGGGAGTGTGAACTATGCCAGGAATTAATCCAAAATGTGGAACCTCCTCGGCCACTCTACAGTAAG  
597 ACGAGTGAGCACGGTGTAGAAAGATGGCAGCTCAGGATTGGGCCTTAGTCAAAGGATTA AAAAGCTGGTCCAGAACCTTC  
598 CGGATCTGAAGCTACCAACTGAAAGGCTATATAATCATTGAGACCGATGGTTGTATGGAAAGGATGGGGCGGAGTCTGCAA  
599 ATGGAAGCCCAACAAGGCCGACTCAGCAGGAAAAGAAGAGATTTGCGCGTACGCAAGTGGGAAAATCCCAACGGTCAATCA  
600 ACAATA GACGCGGAAATA TTTGCGGTCATGGAACTCTTGGAAAATTC AAGATATTTTATCATGAACAAGGAGGAAATCAACAT  
601 CAGGACCGACTGCCACGCCATCA TAACTTTTTACGAAAAGTTGAACGCGAAGAAGCCTTCCCGCTAAGGTGGCTTGTCTTCTG  
602 CGACTATATAACCAACTCCGGGGT CAGAATGAAGTTCCAACATATCAAAGGCAAGGATAATCAGTTAGCTGATAATCTCAGTC  
603 GCCTAACCCAGCTGATCACCAGCAGT GAGATGGCTACCAGAGGA AATGGCAGGAATCGCGCAGAGCTCA CCAAAGAGAGGG  
604 GAATGAGCTCCGCTCTGAGCACA GTTCAGGAGAGCCTCTCAGGCTTTCTCAAAGCTGCCCTCCTCAAGTCGAGAA GTCCTCGA  
605 CTACACCTGTCCGAGGAGCGCCCTGCTTTTGGCAGAGA TGGAAAGAGTCTAGAAGA CTGGCCAAACGGCTCAGAGACCGA  
606 GTCTTCAACGAAGTCAGCCGGAGCATCAGCGACACTGTATTCATCACC GGCAGGGACCTCGCAACGCCAAAGCATACGCCAC  
607 CAGGGACAACCTGGTATGGCGACCTCGTCCACTCTTGGAGAA GAGAGCAGCTGCATGGAAGCTCCTCGCTGCACACGCA  
608 GAATTCTCCACATGGAAGGACGTAGACGTCTGAGAGGTGTGACGAAA AAGATGACCTCACAATTGCCAAGATC

609 **>endoRYNV-CU3**

610 ACAACGGCTGTATGCTAGTCTACCGCAGGACTTCACCTTAGTCCCTGACGTGATCAACAGATGGGAGTCCATTACAGTCAACC  
611 TCATCAACAAGATGATGTTTGACTCCCTGCAGGACAAGGCGGATTATGTGGAAAACCTCCTTGGAGAAAGGGAGAAAGA AAC  
612 ATGGATGACATGGAGAATGCAGTACGAAGAAGAA TACAAGCAACTCCTCACCATGAGCGGGGACGTGCGAAACCTAACGGCC  
613 GCCGTCAAAGGGTCTTCGGAGTACACGACCCACACAGGATCTGTACACATCCAAAATCAGGCGTATGCGGAGCTAGAAC  
614 GCCTCTACTGCAAAAAGGACGGATGATGTGATCCCTTCTCTACGACTA TTATCAGCTAGCAGCTAAGTCCGGAAGGATGTGG  
615 CTCGGACCCGAGCTATCTGAGAA GCTGTTCCAGGAA GCTTCCACCGGAGATAGGTCCAACCATAGAGCAGGCCTACAAAGATA  
616 GATACCCAGGACTACAATCGGAGTCTTAGCAAGGGCTA ACTTCATCTTGGAGTATCTG CAGAATGTGTGCAACAAGCTGCA  
617 CTACAGAGGTCCCTCAAGAGCCTGAGCTTCTGCAGAAACATGCCAGTACCA GGATACTACGAGAAGAAGCAGTACGGCATCA  
618 GAAAGGCCAAAACTACAAA GGTAAAGCCTACCCAA CCCCAGTGAAGTCAAGAA CAAGTACAAGCACACCTCAGGGAA  
619 GAAGTGCAAGTGCTACTTGTGTGGGATAGAA GGCCATTACGCAAGAGAATGCCAAAGAAGGTGGTAA AACCAAGCGAGC  
620 GGCATACTTCAATGGCATGGGATTGGACGACAATTGGGACGCTGATCAGT CGAACCCGGAGAATCAGACGATGACGAGATC  
621 TGTAGTATCTCGAGGGAGAAAATGCTGGAGGAATGCAGGAGCTGATGGCA TTCAAGACTCAACTCCCTACCCAGTGGAGT  
622 ATGAAGCCAGCACACCACCTTCTTATGCCTTGGACTCAGGTGACAATAGAAAAGAGTGAGAAACCA TCCTGGAGGCGAAG  
623 GAAGGAGATCCCAAAGGCACAGCATGACTGTACTCACCTGGAGTGATACACAGGAAGTGCCAATTGAAGGAAGGATATGC  
624 AGTATATGCAGTGACGAGACACCCACGGGAGGAGAGTACCTGCACCACCTGCAGCCTCAACCTCTGTCTTTCGCGCATAT  
625 ATGGATCACGGGATCAAGCTGATAGCTGCAAAGGACACGAAAGATGCAGCTAAA TGGCAGTATCATAAACAAAGATGAGCTCA  
626 TACGACACCTCTATGAGCACAACGCTTTTCTACAAGAAAA GTAGAGGAGTTAACAGCCA GCTGCAGGAGTTCCACAACCCG  
627 AGGCAGGATGATCTGATCAGCCTGGCAGACGACCTGGAGGACGTGTCTATCCTA GACAACGCCTCAAAAAGAGGGAAAGGAG  
628 AAGGAATCATTCGATTTGGAACAACGATTCCACCGATCA CATCCAAAACCTTGAAAATGTAGCAAGGATGATCGAACAATG  
629 GAAGGAAACCCCAAGGTAATCATCAAGAAA CA GCTGAGAGCAGCAGCAACACCATTGGAGCCCTCTTAGCAGAAGAAGG  
630 AATAGAGGAGCTAGCCGACGTGTAGACA CGGCATACACTGAAATGCCAAAAGGAGGACTAAACAAGCTCTACAACA CATT  
631 GTTGAGTTTGTGATACCTCAGGAGAAAAGGGCACCCACAAGATTTAGGGTAAGGGCTGTAATCGACACAGGATGCATGCA  
632 TTAACAGCAAGAAAGTCCCAAGGAAGCACTGGAGGAGGCGAAGTACCAGATGAACTTCGAGGAGTAAACTCCACGGGAG  
633 AAACAAAACCTCAAGATGAAGAACGGTAAGATGATCGTATCTGGAAGCGACTTCTATACACCGTACATTGCAGCTTTCCGATG  
634 GAACTGCCAGACGTAGACATGCTCATAGGATGCAACTTCTTAAGGGCCATGAAAGGAGGAGT CAGACTTGAAGGGACAGAA  
635 GTGACAACTACAAAAAAGTCAACCACATCCAGACTACCTTGGAGCCACAGAAAATATCTCTCTACGCGCAGAAAGCAAGT

636 AGAGGAGGAGATTGAGCGCATGTACTACGCAACAGACTACTCTGAAGAGGGAGCTAGTCGTCTGAGAAATCACAACTGCTG  
637 CAGGAGCTGAAGGAGCAAGGCTACATAGGCGAGGAGCCAATGAAAGCACTGGGCAAAAAATGGAATCAAGTGCAGACTTGAC  
638 ATCAAGAACCAGACATAGTAATCAGCAGCAAACCCCGAATGTCAGTCTCAAAGGAGACAAAGCACAGTACCAAGCGGCACA  
639 TAGACGCCTTGCTAAAGATCGGAGTGATCCAAACGAAAGCAAGCAAGCACAGAACCGCTGCCTTCATCACAACTCAGGGAC  
640 GTCTATCGACCCTGTACTAAGAAGGAAATCAGGGGAAAGAAAGGATGGTGTTCGACTACAGGAGTCTGAACGACAAACC  
641 CACAAGGACCAATACACCTTGCCAGGGATCAACACCATCATATCTGCGATCGGGAAATGCGAAGATCTTCAGCAAGTTTGTCT  
642 GAAGTCTGGAATCCACCAAGTGTGATGGACGAAGAATCCATCCCGTGGACCGCAATTCGTGACACCAGTAGGGTTCTACGAGT  
643 GGAAGGTAATGCCCTTCGGACTCGAAACGCTCCGTCCGTCTTTCAAAGGAAATGAGGACAGTGTTCGAGGAACTCAGAA  
644 TTCATAGCCGTCTACATCGACGACATCCTGGTCTTCAGCAAGACCTTAAAGGAAATGAAAAATCTCTCAGCATCATGCTGGG  
645 ATATGTCGAGACAAACCGCTGGTATTGTCAACAACTAAAATGAAGATAGCTGCAACCGAGATAGATTTCTGGGAGCCACTAT  
646 AGGTGACGGAAGAATCAAACCTCAGCCTCACATAATCAAGAAAATAGCAGAGGTGGACGATGAGTCACTCAAGACCTCAAG  
647 GGATTGAGGAGTTGGTTGGGAGTCTCAACTACGCGAGGAATTAATCCAAAGTGGGAACTCTTCTCGGCCACTATACAG  
648 CAAGACTAGTGAGCACGGAGACAGGAGATGGCAGCATCAGATTGGGCCTTGGTCAAGAAGATCAAAAGCCTGGTCCAGAA  
649 CTCCAGACCTAAAACCTGCCAGCGAAGAACCTACATGATCATAAGACTGATGGATGCATGGAAGGCTGGGGCGGTGTTT  
650 GCAAATGGAAGCCCAACAAAGCAGACTCAGCAGGCAAGAGGAAATCTGTGCCTACGCAAGTGGGAAAGTTCACCGGTGA  
651 AATCAACCATTTGACGACGAAATCTTCGCGTAATGGAGTCTTAAAGAAAATTTAAATTTTCTACATGAACAAGGACGAAGTCA  
652 CCATCCGAAGTACTGCCACGCCATCATTACCTTCTACGAGAAATTAACGCCAAAGAACCTTCTAGGGTAAGGTGGTTAGCTT  
653 TTTGCGACTATATAACGAAGTCAAGGGTGAAGATGAAGTTCGAACACATCAAGGGTAAGGATAATCAGCTCGCTGACAACCTC  
654 AGTGCCTTACTCAACTAATCAAGTGGTCAAGTGGTTCGGGAAAGAGTGAAGGATCTCGCGCCGAAGTAAACAAAGGAG  
655 AAGGCAAGACGCCAACGAAGAAGGAGACACAGGAAGAAATCTCTGTTTTCTCAAAGCTGCCCTCCGAGCAGAGAAATC  
656 CGCGACTACTACCCATCAGAGCCGCACCATGCACTATGGCAGAGATGGATGAATCCCGAAGACTGGCTCTGCAACGAAGAA  
657 ACAAGGTCTTCGACAGCATCGCACAAGGCATCAGCGACGAGTGTACGTCAAGGTGTCGACCTTCCCGCCGAAAGGCACG  
658 AGCCACCAGGGATAACTGGTCAACGACGTACCCCGCGCTGGAACAAAGAGCAGTGCATGCATGGAGACTCATGGCAGCC  
659 TACTCAGACTTCGCCACGTGGAAGACGTGAACGTCTAGTGAAGTGCAGCAAGGGATGACTTCACAATTGCCAATGTCGTCT  
660 TGCTTACGACTTGAAGTATCAGTGTAGTGTGCGCAGCATCTCCAGTGTGAGATATTTGTGTGTAAGTGCGCCATTAGTGC  
661 CTGTGTCAGGATAAGGAATCTTATCTCCTTCTCTTTAGCTTTAGCAAAGCTGTAAAGCAGAAGTATTAGCTGTGCGATGG  
662 GGCCAGAAAGCGCACCCGAGCTAGTAGTTGTCTGTCTTTTGTAGCCTACTTCTATATAAGGGAGTGTAGTCTGAAGGCT  
663 TAGGCATCGAGCAATCTCAATAGCCAACCTTCTCCTGATTTGATTAACGTTCAAGAGAAATAAGATTGTTCTCAGTTTTCCG  
664 CAATATCTCTCAGTTTTATGAGTTCTTAAGTGTCAAGAGCGCATTTAAGAATTTTGTATAATGGGAAACTGAAGAACATC  
665 TTTATTTCT

666 **>endoRYNV-BS**

667 TGGTATCAGAGCTTTAGCTCTCTTATTATGTCAGCTTAAACACCTTTTTTCGTGTGAGAAACCCAAAGTTTCGGATCTGAACT  
668 TGAGTTCCTCTCTTTTTCAAGGAGGTAGTGAAGTAAAGCCAGCTTTGCAACTTTCAAACCCAGGAAAACTTCTCACGGTATT  
669 ATAAGTTTTCTGACCCTACTAGTTCAACCTACTGCTTGAAGTGCAGACTTAGGCGTCAAGCGAAGTACCCTGTAGCCGTT  
670 AGCCAGGTGGGCGTTAGGCGTTGATTGGGGAAAATGGACGTAAAGGAGCAGAGGCAACTAGGCGAGAAAAGTGAAGGACCA  
671 GATCACCGGTGCGAAAGCCAGTAAGCGGCTAGATTGGGGCATAGCTGATGCAACCTCACGAGATCCTTTCCTTCAAGAAAG  
672 GAGCAACTCTGGGAACGATCTGAACGGGCGAATCGACACGACTTCTATTAGAAATCTCAGATCTTATCAAGATACGAGG  
673 CTAACCAGAAATCACCTTCTGTGATTTCCCTTGTACCAATTTCAACACCACCAGGACCACAGTCCACCACCAATCTGCAA  
674 ACAAAGAAGCAGTGAAGACTTACCTTACCTGGTAAACACTCTGTTGATTTATCTATAACAGTATTCACAACCAAGGCTGTCT  
675 CGACGACAAAGGTCTCGAGACTCACACAGTACCTGGTAAAGAAAGTGGGACACTCCCGACTATCCCGAGGATTCACCCCTC  
676 TGGACCAAGAACTCCCTGAGCTTAGATCTGACGCCCTAAGGGCAGATCTCAAAGGAGTCAAAGCAACTCATCCGCACTAAA  
677 CTCGGTTTTGAACAAGTCCGAGAAAGCAGTTCAAATGATCATCTCCAGGGAGAACGATCCAAAGCCAATCGAAGCCACGACTGC  
678 ACTTGTGGCAGAACAGCTGAGGAAACAGTTGATTGAAGTCAAGTCTGTGCTTGGAGAAACCAAGAAGGTCGTGATCGCTG  
679 TCCCCTAACGGATGAACCTAAGTGGCAGGACACCGCCACAAAGGAAACCTATCAGAAGGCACTTCAAGCAACAGCATCCCTC  
680 ACCTCAAACAACAGGCTAGGGTTTATTGAAACACACACTTACGGGAGGACAGTTGTCCTAACCTAGCCAAACAGAA  
681 CAACAGCTCATCCAGCTGTTGGTTCAGGCGCTAGAGAAGTCTCGACCTTGAACAAGCCGTCGCAAACTGACAGCTCAGG  
682 TCACAAGGCTTGAAGAGCAGTGCAGAGAAGGACACGGTAAAGCTACCGGAAAGCGTCTCAACGACCTACCAAGGAATT  
683 TGGGAAGGTCAACATCGGAAAAGGAAAAGGGATCGAAGGCACAAACACTTCAAAGACAAGAACTTCTACGTCTGGAAGAAT  
684 CCCTTCAACAGTAAATGAGCAGAAGCCAAACAAGGCTCCAGGCTCCGCCCCGCAACTGAAAGGGCCACATCTAGCTCGGACT  
685 CAGGTACCCCTACCTGGAGGACCAGATCCGCGGCTACAGACGCTCGGCAAGGTTACGACACCAAGCCAGCGAGCAGTTCCG  
686 GAGAACCTCAGCAGGGAATTCGAAACAATAGAACGGCAACTTGACCCAGATGCCGAAGTCTCCCTCAGCAGAAAGGAGG

687 AGAGCAAACCTAGTACCAGCAGAGGTA CTATACGCACA CAACGGTTCAGAA CCAGTAAACAGGGTGTATGAACTACTACAGTG  
688 AGATCGGAGCTCACA TAGTAGACAGGCAGCAGGACTTCAGGTACATTGAAGAATCCTCTTACCAAAGGCTAGCACGAGAAGG  
689 CATGCAGTTTATACATGTAGGCATGGCCATGGTAAGAA TACAGATGCTGCACAGGACTGACGCA GGAATTTCTGCACTAGTAG  
690 TCTTTTCGGGACACTAGATGGA GTGATGACAGGCAAGTCA TTGGAAGCATGTCGGTAGACATGACAAGAGGTGCACAGCTGGT  
691 ATATATCATACCAAATGCGATGATGTCAGTACACGACTTCTATAACCGCATACAAGTCAGCGTGCAAACAGAGGATACGGTA  
692 CAGGCTGGGCGGGAGGAGACAGCAACTGATCATCACCAGATCACTGGTGGGAAGGCTGACCAACACCAGCATGACAAATTT  
693 TGAGTACCGAATAGACCAGGTCACAGACTACCTTGAAGCAATGGAGTCCGCATGCATCCCAGGACAGAAA TGGGACGTGGCC  
694 AACAGATCAGGAGAGTGGGAACTTCAGCCAAGCAGGATAGTGGCTCCACTCATGACACCTACAGAGGCAAGGCTGACCCAGA  
695 ATAGAAGCGGCAGCATCAGCCTTAGGTTACAGACTTCCGTGATCAGAGGATCGTGGAAGAAAGGCCGAGAGAAGAAG  
696 GCAGGCCAGAGGAAGAAAGCACACACTATGTGCTCATGATCAGCCACA ACTCAAGCTCCTATAGGACAAACCTCAAGGGAGA  
697 AAGAAGGCTGAGACAGGAAGAACTCGTGTGAGTTCATGCCAGAATCAGATCTGGTAAGTCAATGGCTGAGTCACTTATCAGCT  
698 TCAGCACACAACAGTGGAGCCTCAGACTCAGAGGACGAACCAAGTTCGATGAGACTGACGAAGAAGCAGATGATGACA  
699 CGTATAATCAGCGAACCTGGCAGAAAGAGGACCAAGGAGAGAAGACA ACTGGAAGTGCAGGGGTGGAAGAAAACAGCAGG  
700 CCAGGAATCTATGAAATGATCCCTCAGGAAGAAGAAAGTCTACCTCCGCTATGAGGCAAGATCAGAGGAAGAGGATCAAC  
701 CCAACAGATCTTCGGAGCTACAAAGGTGGATGAA CCCGAAATGGAGTACCCACAAGGCTCGAAGAAA TGATGAACAAGCT  
702 CAAAGGAGTGAGCATGGATAAGCTTTTCCAGTGACCATGGAATCTGAGTCCAGCATAACTGGAGGAGGCTTCATACCACAA  
703 GCCCAGTGCCCGGAGCACAAAGGATACCCACCTGCAACAGGCCAGCCTTTGGATCAACTATAGGCCCGCAGACTTACAGGG  
704 ATGGGGAGGAAGACTGCCAGGAGCAGGTCTCCACTAGGATACGGCAGGCCCAACAGCCATGGTCTTGCATCAGCCAA  
705 TCAGAAAACGGGTGTATGCTAGTCTTCCA CAAGACTTCACTTTGTTCCCGACGTGATAAACCGATGGGAATCAGTAACCGT  
706 CAACCTGATAAACAAAATGATGTTGACTCATTACAGGATAAGGCGGACTACGTGGAGAATCTCCTTGGAGAAAGGGAGAAA  
707 GAAACATGGATGACCTGGAGAA TGCAGTACGAA GAAGAATA CAAGCAACTCCTCACCATGAGCGGCGATGTGAGAAA CCTCA  
708 CGGCTGCAGTTAAGAGGGTCTTTGGAGTACATGACCCCCACTGGATCTGTGCATA TCCAGAATCAAGCTTATGCAGAGCTA  
709 GAACGGCTGTACTGCAAAAGGACGGATGATGTGATACCTTTCTGTACGACTACTACCAATTGGCAGCAAAGTCCGGGAAGGA  
710 TGTGGCTTGGCCAGAACTGTCTGAGAAGCTATT CAGGAAATACCTCCTGAAATCGGCCCTACAATTGAACAAGCCTACAAA  
711 GATAGGTATCCAGGCCTTACCATTGGAGTCTTGGCACGCGCAACTTCA TCCTTGAATACTTGCA GAACGTCTGCAAA CAAGCA  
712 GCACTGCAGAGGTCCCTGAAGAGCCTCAGTTTCTGCAGAAACATGCCTGTGCCAGGATACTACGAAAAGGAGCAGTATGGCA  
713 TTAGGAAGGCCAAGACGTACAAAAGGGAAGCCCCATTCAACACAGTCAAGGTCATCAAAAACAAGTATAAGCACTCAGCAGG  
714 AAAGAAGTGCAAGTGCTATCTGTGGCATTGAAAGGCCACTACGTAAGGAGTGCCCAAAACAGGTGGTGAAACCACAAAGA  
715 GCCGCCTTTTCAACGGCATGGGACTCGATGATAA CTGGGATGTTGTA TCTGTAGACCCAGGAGAGTCAGATGATGACGAGAT  
716 CTGCAGCATATCCGAAGGAGAAGGAGCAGGAGGAATGAACGAGCTCCTAGCCTTTAAAACA CAACTGCCATACCATGTGGAC  
717 TACGAGGCCACAACATCATCACAGCAGTTAATGCCATGGATA CAGGTCATGTATCAAGAAGTGAAAAACCATCCTGGAGACG  
718 ACGGAAGGAAGTCCGAAAGGAACAGCAGGATTGTTCTCACCAGTGGAGTGAACGAA GGAAGTGCCACTAGAGGCGAGAGT  
719 CTGCAGCATTTGCAGTGTGAAACTCCATTAGGCA GGAAGGATCACTGCGAAACCTGCAATCTGAATCTGTGCCATCTGTGC  
720 ATATATGGATTACGGAATCAAATAGTAGCAGCTAAAGACACAAGGGACGCTGCAAAAATGGCA GTAACAACAAGACGAG  
721 CTCATCCGCCAACTATATGACCATAACGCTTTTCTAAGCAGGAAAGTGCATGAACTACCAGCCAGCTGCAACAATACAGAGAT  
722 CGAAAACCTGAAAGATCTCATAGCCTCGCAGATGACCCAGAGGACATGTCCA TACTGGACGATGCCTCA AAAAGA CGGGGGA  
723 AGGAGCATGAAA TCTCCAGTTCCGAACGACATTGCCACGGATCACCTCCAGAACATCGAGAATGTGGGGCGAA TGATCGAA  
724 CAGTGGAAAAACAACACCCCCAGAGTACCATCAAAGAAATA TAGGTGACGAAATGCCTAGCAGCAGCAGCACAATAGGAG  
725 CACTCCTCGCA GAAGAAGGAATCGAGGAACTCGCTGTAGCAGTAGACACGGCGTATACTGAAATGCCAAGGGAGGAC TCAA  
726 CAAGCTCTACAACACGGTTGTGGAA TTTGTCATCCCCAAGACAAGGGAGCGCCAACAAGATTTCCGGGTAAGAGCAGTCATTG  
727 ATACAGGATGCACCTGCACCTGCATAAA TAGCAACAAAGTCCCGAAAGAAGCCATGGAAGAAGCAAAGTACCAGATGAACTT  
728 TGCAGGAGTAAATTCAGCGGGTAGTACAA GGATGAAGATGAAGA GCGGAAAAATGATTGTA TCTGGGAGTGACTTCTACACC  
729 CCGTACATAGCCGCTTTCCATGAACCTGCCTGAAGTAGACATGCTCATAGGCTGCAACTTCTACGAGCCATGAAAGGAGG  
730 GGTCA GATTGGAAGGAACAGAGGTGACAA TCTA CAAGAAAGTACGACTATTAGACGACCCCTCGAACCAAGAAAATCTCC  
731 CTGATGAAA GCAGAGATGGAAGCTGAAGAGGAGATTGAAAGGATATACTACGCCA GTGATCATTCCGAAGAAGGAATGAAC  
732 AGGCTTAGAAAACCAAGCTGCTCCAGGAGCTTAAGGAGCAAGGATACATAGGGGAAGAGCCCATGAA GCATTGGGCCAAG  
733 AATGGAATCAAGTGCAAACTTGATATCAAAAACCCCGACATCGTCATCAGCAGCAAGCCGCTGATGCTGTATCAAAGAAAC  
734 AAAGGCCAGTACCAGCAGACATTGATGCTCTGTTAAAGTAGGGGTATCCGGCCAGCAAAAGCAAGCATCGCACCGCG  
735 GCCTTTATCACACATTCGGGCACAAGCATTGACCCGATAACCAAGAAGGAGATACGGGGAAAGGAAAGAATGGTCTTTGACT  
736 ACCGAAGCCTGAACGACAACCCCA CAAGGATCAGTACACCTGCCAGGCATAAACACAATCATCTCCGCCATTGAAAACGCG  
737 AAGGTCTTACGCAAGTTCGACCTGAAATCAGGATTCCCAAGTCTCATGGACGAGGAATCAGTACCATGGACCGCTTTGT  
738 CACACCCGTAGGGTTCTACGATGGCTCGTATGCCATTGCGCCTCGAAATGCACCTGCAGTATCCAAA GAAAGATGGACC  
739 AGTGCTTTCAGGTA CTTCAGATTTTATTGCTGTGATACATTGACGACATACTCGTTTTTCAGCAAGACAATCAAAGAACATGAGC

740 GTCACCTGAGCATCATGTTGAGCATCTGTGCGAGACAACGGCCTGATCCTCTCGCCTAGCAAATGAAGATCGCCGCCACGGAA  
741 ATTGATTTCTCGGGGCAAACATAGGTGACGGAAAGATCAAGCTGCAACCGCATATCATTAA GAAGATTGCGGAAGTGCATG  
742 ATGAATCCTTAAAGACCCTCAAAGGATTAAGGAGCTGGCTAGGATCCTCAACTACGCCAGAACTACA TTCCAAAATGCGGA  
743 ACCTTGCTTGGGCTCTGTATAGCAAGACAAGTGAACATGGGGATAGAAGGTGGCACGCACAGGATTGGGCTTTGGTTA GAA  
744 AAATAAAGGCCTTGGTCCAAAATCTGCCAAACCTGCAATTAACCACTGAGGAAGCCTACATCATAATTGAGACTGATGGATGT  
745 ATGGAAGGCTGGGGAGGCGTATGCAAGTGAAGCCCAACAAGGCTGATTCACCAAGCAAGAAGAATATGCGCCTATGCA  
746 AGCGGTAAATTCCCTACCGTAAAATCTACCA TTGATGCGGAAATCTTTGCTGTCTGGAATCATTGGAGAAATTCATAATCTTCT  
747 ACATGAACAAAGATGAGATCATCATCCGCA CAGACTGCCACGCCATCATCACGTTCTACGAAAAGTTGAA CGCAAAGAAACCT  
748 TCTCGGGTAAAGTGGCTAGCCTTTTGTGACTATATAACTACTCTGGTGTCAAGATGATATTCCAACATATCAAAGGGAAGGAC  
749 AACCAGCTCGCGGATAATCTAAGCCGCCTCACACAGCTCATCACTGCAGTCAGATGGCTCCCAACAGAAAATGCGAGGAATCGC  
750 CAGCGAACTACCAAGGAGAGAGCTCCGAGTCCAGCAATGGACGAGGTACAGAAGAACTGTCCGGCTTTCTAGAAGCTGCC  
751 CTCCACCAAGTCGAGAAATCCTCGACTATGAACCATTCGCGAGAGCACCATGCTCTATGGCGGACATGGAGGAATCTCGAAGA  
752 GCTGCCAAACAGCTCCGGGACAGAGTTTTCAACGAGGCAGGAAGACAGATCAGCGACATCGTCTTCA CAGGAAAGGACC  
753 TCGCAGCAGCCAAGGCATACGCTACCAGGGACAATTGGTACGGCGACCTCGTCCGGCTCCTGGAGAAA CGCGCCGAAGCGGC  
754 GTGGAAGCTGTTAGTCGCATACTCCGAGTTCTCTACGTGAAAAGTGGATGTCTAGAAGACATGACGTAGGAGCTCACCTCAGT  
755 AATTGCCGGGACGTCACTGCGTGCCTCACGGAACCTATCTTTTGTGTCGGCAGCACGTATTAGCTGTCACGCA TTTTGTAAAGT  
756 GCGCCATTAGTGCCTGTAGTCAAGATAAGGAATCTTATCCTTTGCTTTAGTTAGTGGCAAGCTGTAAGCAA GCATTATTAGC  
757 TGTCGATGGGGCCCCAAGCGACCCGGGCTAATTTTCTTTGCTTTTAGCATAAGCCCCCTTCTATA TAAGGAAAGCTAAGTTA  
758 GAAGGCTTAGGCATCGAGCAACCTCAATAGCCAACCTTCTTTGTAATATCAGTATTCAAGAAATTA GTATTCAAGAAATTAGT  
759 TG

760 **>endoRYNV-PH1**

761 TGGTATCAGAGCTTTAGCTCTCCATGGTAGCTTAAACACCTTTTTCTTGTGCGAGAAACCAAGTTTCAGATCTGAACCTTGAG  
762 CTTTCTCTTTTTCTAGGGCGAAAGGAGTGTACCTGTTCAAACCTTACCTGATCAAACCCCATGAAAACTTTCTTACGG  
763 TACTATAAGTTTTCTGTCTACTAGTCCAACTACTGCTCAAAGTGCAGGCTTAGGCGTGAAGCGAAGTACCCTTGTAGCC  
764 GTTAGCAGGAGGCGTTAGGCATTGATTGGGAAAAGTACGTAAGAAAGCAGCAGCAA CTAGGC AAGGAACTTGCAGACA  
765 GATCACCGGCCGAAAGCTAGTAAGCGGCTAGTCTTGGTGGTTTTGATGCAACCACAGAAATCTCTGCCTTGAAGAAGAG  
766 AGTAGCTCCTGGAAAGATCTGAACGGGCGACTCGGCAAGACTCTTTA TTCAAGAATCTCAAAAACCTATCCAGTTGGGAGG  
767 CGAATCAAAAACACCTCTCTCGATTTCCCGTGTACCCTTCAACAACAATCTGAAGAAAACAGCTCATCGAGGTCAAGACA  
768 GTCCTCGAAGAGCAAGAAGATCGCTAGGTCTTTA TCCCCGACGGATGAACCCTAGGTGGCAGGATACTGCAGCCAAAGGA  
769 GACCTACATCAAAGCGATCCAA GCTACCTCATCGTTA CCTCCAGCAACTGGTCAAGGTTTCATCGAACCCACATCTACAC  
770 AGGAGGACAGCTATCCACTAACCTAGCAAACAGAAACAACACTATCATCCAGTTGTTGGTTCAAGTGTAGAGAAGAACCTCG  
771 ACCTTGAGCAGGCAGTCGCCAACCTCACAGCTCAGGTACGAGACTAGAAAAGGCCGTGCTGACAAA GACACGGTCAAGCT  
772 CCCTGAGAGTGTCTGAACGACCTCACAAAAGAGTTCGGGAA GGTAACTTAGGGAAGGGCAAGGGGATAGAAAGGAACCGT  
773 CTCTTCTAGAGACAAGAAGTCTACGTCTGGAAGAACCCTTCAACCA GTACAATGAACAGAA GCCACACAAGGCTCCAGGCT  
774 CCGCCCGCAACTGAAAAGGGCCACGAGCAGCTCGGACGAGGAACCCCACTCTGGAGGACCAGATCCGAGGCTACAGACGCT  
775 CTGCACGGTTACGACACCAAGGCGCAGCGCACCATGAGAAGGACCTTCA GCAAGGACTTCCAACGGCAACTAGATCCGGATGC  
776 CGAGCTCTCTCAGCAGAAAGGGGAAGAGCA AACCTGGTACCAGCAGAGGTA CTACACACTGAAAGAAAGAGGACCATCC  
777 GAGCCAGAAGGAAGGCCAGAAGGAGAGGACGAGAGCACA CATTATGTGCTAATGTTCAACCATTCCAAGCCAGATGGGATA  
778 CGCTCGGACAGCCAAGCGGAAAATATGACTACATGGTACGGTATGATGCACCGGAACCAACCGCATGGCCGACAACCAATAT  
779 AGGATGGGATGACGACCCACCAAAGCCACCAAGCCCTAAAGGATCTTTT GAGATCAACCTAAGAGGCGAAAAACGACTAAAA  
780 GAGAAGGAACTCTCAGAGTTCACTCCTGAAACTGACCTAGTCACTAGTCAAGTGGTTGAGTCACTCTCCAACCTGCA CACAACAGT  
781 GGAACCTCGAGCTCTGAAGAAGAGCCAAGTTCGACGAGGCAGACGAGAGAACGACGAGTACAACAGCAAACCTGGCAA  
782 CGAGAGGACCAA GAAAAAGAGACCTGGAAC TCAAAGGTGGAACCTACTGGTAGACCAGGAATTTACGAAATGATCCCC  
783 GAAGAAGAAGAAGTCTACCTCAAATATGAGGCA GAAGACGAAGAGGAGGATCAGGAGCTTCAAGTGATTGGAGCCACC  
784 ACCATAGAAGAGCCAGAAA TGAATACCAACAAGGCTCGAGGAAGTTATGGGCAAGCTCAAGAA CGTGAGCATGGAGAAG  
785 CTGTTCCAGTCAAGTGGGATGGACAGCGAA TCCAGCATAACAAGGTGGAGGATTTATCCACCTAGCCCCGTGCCAGGCGCAC  
786 AAGGATATCCCCAGCAACAAGCGCATCAGCGTCCACAATAGGACCAG CAGACATGCAAGGATGGGGAGGAAGAATGCCTA  
787 GAAGCAGATCACCTTGGGCTATGGCAGACCTCAACAACCTTGGTCATTGCCA TCTGCACAGTCAGACAATGGCTGTATGCTA  
788 GTCCTGCCACAGGACTTCACTAGTCCCGACGTCAACAGATGGGAGTCTATCACAGTCAATCTCATCAATAAGA TGATG  
789 TTTGACTCTCTCAAGACAAGGCGGACTACGTGAAAATCTCTAGGCGAAAGAGAGAAGGAGACATGGATGACATGGAGGA  
790 TGCAGTACGAGGAAGAGTACAAGCAGCTCCTAACCATGAGCGGGGACGTGAGAAATCTCACCGCCGACGTA AACGGGTCTT

791 CGGAGTACATGACCCACACACAGGATCAGTGCAATCCAGAACCAAGCATATGCGGAGCTAGAGCGGCTCTACTGCAAACGA  
792 ATGGATGATGTGATCCCCTTCTCTATGACTACTACCAGCTAGCAGCCAAATCAGGAA GGATGTGGCTCGGACCCGAGCTGTC  
793 GGAGAAGCTATTTAGAAAGCTCCCCCGGAAATAGGCCAACAATAGAACA GGCCATAAAGACAGATACCCAGGGTTGACG  
794 ATAGGAGTCTAGCAAGGGCCAACTTCATCCTGGAGTATTTACAAAACGTATGCAAGCAGGCAGCCTTGCAACGATCTCTCAA  
795 GAGCCTGAGCTTCTGCAGGAACATGCCAGTACCAGGTTACTATGAGAAGAAGCAATATGGCATAAGGAAGGCTA AACCTAC  
796 AAAGGTAAGCCACATCCAACCCACGTGAAAGTGATCAAGAACAAGTACAAGCACCCCAAGGGAAGAAGTGCAAGTGCTACC  
797 TATGTGGGATAGAAGGCCACTACGCCAGAAATGCCCGAAGAGGTGGTCAAACTCAAAGAGCGGCATACTTCAACGGCAT  
798 GGGCCTAGATGATAACTGGGATGTGCTATCTGTGCAACAGGAGAGTCCGACGACGACGAAATCTGCAGTATCTCAGAAGGA  
799 GAGAACGCTGGTGAATGCACGAGCTGATGGCATTCAAGACCCAACTCCCCTACCCAGTGGAGTATGAAGCCAGCACACCAC  
800 AGTTCCTGATGCCTTGGACACAGGTAACAGTGGAGAGAAGTGACAACTTCTGGAGAAAGAAGGAAGGAAATCCCAAAGGT  
801 ACAGCAGGACTGCACGCACACCTGGAGCGACACGCAGGAGGTACCTATAGAAAGCAGGATATGCAGCATAATGCAGCGATGA  
802 GACACCTCACGGACGGAGAGTGACCTGCACAACATGCAGCATCAACCTGTGCCCTTTGCGCGTATATGGATCACGGGATCA  
803 AGCTAATAGCCGCAAGGACACCAAAAGACGACGCCAAATGGCAAATACACAACAAGGACGAGCTGATTCTCACCTGTACGA  
804 GCACAATGCTTCTCACCAAGGAGGTAGAAGAACTACCAGCCAGCTGCAAGAATCCACAGCCGACAGCTGAAGACCTGA  
805 TCAGTCTGGCGGACGACTTGGAGGACGTGTCCATTCTGGACAACGCCTCAAAAAGGGGGAAGGAGAAGGAATTGTTCCAATT  
806 TGGAACGACAATTCCTATTGACCATCCAAAACCTGGAAAACGTGGCCAAAATCATCGAA CAATGGAAAGACACCCCCAGGG  
807 TTGTGATCAAAGAGACCTGAAAGCAGCAACAACACCTTGGAGCCCTCTAGCCGAA GAAGGGATAGAA GAACTAGCTGC  
808 AGCAGTGGACACAGCCTACACGGAGATGCCAAAAGGAGGCCTCAACAACTTTACAACACCA TTGTAGAGTTTGTAAATACCAC  
809 AAGAAAAAGGGGCACCCACCAGATTCAGGGTACGAGCTGTAATAGACACAGGATGCACCTGCACATGCATCAACAGCAAGAA  
810 AGTCCCCAAAGAGGCACTAGAA GAGGCAAAGTACCA GATGAACTTTGCAGGAGTAAACTCAA CGGGAGAAA CAAGCTCAA  
811 GATGAAAAATGGTAAAGATGATCGTCTCTGGGAGCGATTTCTACACACCATA CATAGCAGCTTTCCCGATGGAGCTACCAGACG  
812 TAGACATGCTCATAGGATGCAACTTCTAAGGGCTATGAAAGGAGGCGTTCGTCTTGAAGGAACGGAGGTGACGATCTATAA  
813 AAAGGTTACCACCATCCAGACCACCTTAGAGCCTCAGAAGATATCCCTCCTCCGCGCAGAAGCTGAAGCAGAAGAGGAGATG  
814 GAGCGCGTGTACTACGCGAATGACTATTCGAAAGAAGGAATCATGTCGCCTGAAGAACCATAGGCTGCTACAGGAGCTGAAGG  
815 AACAAAGGCTACATTGGCGAGGAACCAATGAAGCACTGGGCCAAAATGGTATCAA GTGCAA GCTTGATA TAAAAACCCAGA  
816 TATAGTGATCAGCAGCAA GCCCCTGACTCAGTGTCAAAGAGACAAAGGCCAATACCAGCGGCACATTGACGCCCTACTCA  
817 AGATAGGAGTCAACAGCCTAGTAAGAGCAAGCACAGGACCGCGCCTTCA TCACACATTGGGTACGTCCATTGACCCGATC  
818 ACAAAGAAAGAAATCAGAGGAAAGAAAGGATGGTGTTCGACTACAGAAGTCAAACGACAACACCCACAAA GACCAATACA  
819 CTTTGCTGGGATCAACACCATCATCTCAGCGATTGGCAATGCAAA GATCTTCA GTAAGTTTGATCTGAA GTCTGGATTCCACC  
820 AGGTGCTGATGGA CGAAGAATCCATCCCATGGACTGCATTTGTACGCCAGTAGGGTTCTACGAGTGGAAAGGTCATGCCCTTC  
821 GGACTCGCAACGCTCCGGCGCTTCCAGAGAAA GATGGACCAGTGTTTTGCAGGAA CCTCAGAGTTCATCGCCGTCTACAT  
822 CGACGCATCCTGGTCTTTAGCAAGACCTTGAAGGAGCACGAAAAGCACCTTAGCA TCA TGCTAGGGATCTGTGAGACAACG  
823 GCCTGGTATTGTACCCAGCAAAATGAAGCTTGCAGCAACCGAGATCGATTTCTTGGGAGCTACCATAGGTG ACGGAAGGATC  
824 AAGCTCCAGCCTCACATAATCAAGAAGATTGCAGAGGTGGACGACGAGTCCCTAAAAACCTCAAAGGGTTAAGAAATTGGTT  
825 GGGAGTTCTCAACTATGCCGAAACTACATCCCGAAGTGTGGAACACTCCTCGGCCACTA TACAGCAAACTAGTGAGCATG  
826 GAGACCGTAGGTGGCATGCCTCAGATTGGGCCTTAGTAAAGAAGATCAAAGGCCTGGTCCAAAATCTCCAGACCTGAAACT  
827 GCCCACA GAAGAA GCCTACATGATCATCGAAA CCGATGGATGCATGGAAGGTTGGGGAGGAGTCTGCAAGTGGAAAGCCCAA  
828 CAAAGCAGACTCAGCTGGAAAAGAA GAAATCTGCGTTACGCAAGTGGGAAA TCCCAAGTAAAATCCACGATTGACGCA  
829 GAAATCTTCGCGGTAATGGAGTCTTGGAGAAGTTCAAAA TCTTCA CATGAACAAGGACGAGGTCA CAATCAGGACTGACTG  
830 TCAGGCCATCATCACCTTCTATGAGAAGCTGAACGCTAAGAAA CTTACGGGTAAGGTGGTTAGCTTTTTGCGACTATATAAC  
831 AAATCAGGGGTGAAGATGAAGTTGCAACACATCAAAGGCAAAGACAATCAGCTTGCCGATAACCTCAGCCGATTGACCCAA  
832 CTCATCACCTGGTCAAATGGCTTCCAGAA GAAGTGAAGGATCTCGCGGCCGAGCTAGCCAAGAAAAGAAAGGCAAGACCTCCCT  
833 GAAGGGAGAGGTGCAGGAGGAGATCTCCTGTTTTCTCAGAACTGCCCTCCGCCGAGCAGAGGAATCCGCGACTACTCGCCCA  
834 TCAGAGCCGCGCCATGTA CTATGGCAGAGATGGA TGAATCCCGAAGACTGGCCTTACAACGAAGAAA CAAGTCTTCGATGA  
835 CATCGCACAGAA CATACGCGATGCGGTCTACATCA CCGGATCGACCTCGCAGCGGCAAAAGCAAGAGCTACCAGGGACAAC  
836 TGGTACAATGACGTCACACCCGACTGGAGCAAAGAGCA GCTGCAGCATGGAGACTCATGGCAGCCTACTCAGACTTTGCCAC  
837 GTGGAAGGACGTAACGCTAGTGAA GTGACGCAAGGGATGACTTCACAATTGCCAATGTCGTCTATTGCTTACGACTTGGAAC  
838 TTATCAGTTTGTGTCGGCAGCATCTATTAGCTGCATACTTTATGTAAGTGCGCCAGTAGTGCCTGAGTCATAAGGATAAGGA  
839 ATCTTAGCTCCTTATCGTCTTTAGCTTTAGCAAAGCTGTA AAGATGAA TTTATTAGCTGTGATGGGGCCCA GAAAGCGCAC  
840 TGAGCTGATATTTCTATCTTTTGCTTAGCCTACTTCTATATAAGGGAGTATAGTCTGAAGGCTTAGGCACAGAGCAATCTCT  
841 TTAGCCAACCTTCTTGGAGTTGATTA

842 **>endoRYNV-PH2**

843 TGATACCAGAAACAAAGAATTAACCATGGTCGCTTAAATTTTCTTTTCTTGTCGAGAAACCCAAGTTTCAGACCAGAACCTTGAG  
844 TTGTCTCTCCTTTTTACAGGGGAGGAGGGAGTA CTGAGTGTTGCTAAAATTCTGCAAATTTCAAACCCCATGAAAACTTCTCT  
845 CACGGTATTATAAGTTTTCTGACCCTACTAGTTCAAACCTACTGCTGAAACTGTAGACTTAGGCGTCGAAGCGAAGTACCTT  
846 GTAGCCGTTAGCAGAGTGGCGTTAGGCGTTGATTGGGGAAAACTGACGTAAAGGAACAGCTGCAACTAGGCAA GAAAACTG  
847 AAGGTACAGATCACCGGCCGGAGAGCTAGTACGCGGCTAGATCTGGGCAGATCTCTTGATGCAACCTCACGAAATCTCATCTTT  
848 TGAAGAAGAGAGCAACTCTGGGAAAGGTCTGAACGGGCGTATCGACAAGACTTCTTATTAGGAATCTAAGATCTTACCTC  
849 GTTACGAAGCAAACAGAAAGTCACTTCTGTGATTTCCCTTGCTATCACTTCAAACAACACCGGACCACCAGTCCACCGCA  
850 CTCTCTGCAGACAGAAGAACAGCGAAGATTTACCTTCTGGTAAATACTCTGTTGATCTTAGTATACCAAGATTCACAACC  
851 AAGCGGTCTTAGACGATAAGATCTCAAGACTCACCCAGTACTTGGTGGCAAAGTCCGGCACTTACCGACAATCCCGGAGGAA  
852 TCACCCCTCTGGACGACAGCCATCTCTAGATCTTCAAGCCCTCAAGGCAGATCTAAAAAGATCAAGGCTACCCAGTCA  
853 TTCTTGAAGCTAGGCTTTCACAGCTCCAAGAAGCGGTACAGCTGATCATCAAGGGAGAACGATCCAAACCGATTGAGGC  
854 AGCTACAGCTCAGGTGGCTGAACAACCTGAGGAAGCAGCTTATCGAGGTTAAAGCCGTCTAGAGGAAACAAA GAAGATCGCG  
855 AGATCTCTGTCCCCGACGGATGAACCCAGGTGGCAAGACACCGCCGCAAAGAAAACCTACATAAAAGCTATCCAGGCTACC  
856 TCATCTTTACATCCAACAACACCGGGCTAGGGTTTATTGAACCTCACACCTATACCGAGGCAACTGTCCACAAGCCTAGCA  
857 AAACAAAACAACACGCTCATACAGCTGTTGGTTAGGTGCTAGAGAAATCTCGACCTTGAACAGGCCATCGCGAACCTGTC  
858 CGCACAAGGTACGAGACTTGAGAAGACCGTCCGACAGAGAAAGACACGGTCAAACCTCCAGAAAAGTGTCTCAACGACCTCACT  
859 AAGGAGTTCGGAAAAGTCAACCTTGGGAAAAGGAAAGGGGCTAGAAGGAGCAGTCTCATCCAGAGACAAAACTTCTACGTTT  
860 GAAAGAATCCCTCAATCAATACAATGAGCAGAAGCCAAACAAGGCTCCAGGCTCCGCCGCAACTGAAAAGGCAACAAGCA  
861 GCTCGGACTCAGGCACCCCACTCTGGAGGACCAGATCCGAGGATACAGGCGCTCTGCAAGGTTACGACACCAAGCACAGAG  
862 AGCGGTACGAAGGACCTCAGCAGGGACTTCAGGAACACCATA GAAAGGCAGCTAGATCCGGACGCCGAGTTATCACTCAGC  
863 AGAAGGAGAAGAGCAAACCTAGTACCAGCAGAGGTA CTCTACGCTCAACCGTTCAGAACCTGTGAATCGTGTGTATGAGC  
864 ACTATAGTGAGCTCGGGGCTCATATAGTAGACAGGCAACAAGACTTCCGATATATCGAGGAAGCATCTACAGAGACTAGTC  
865 AGAGAAGGCATGCAATTCATACATGTCCGCATGGCAATGGTTAGGATCCAAA TGTGCA CAGGACAGATGCAGGTATATCTG  
866 CGTTGGTGGTGTTCAGAGACACTAGTGGAGCGATGACAGGCAGGTCATCGGCAGCATGTCCGTA GACATGACCAAGGGGAG  
867 CACAATTGGTATACATAATACCAAACGCAATGATGTCAA TACACGATTTTACAATCGTATACAGGTCAGCGTGC AAAACCCGAG  
868 GCTACGGGACAGGATGGGCTGGAGGAGACAGCAATATGATCATCACTAGATCACTGGTGGGGCGTCTACCAACACAGCAT  
869 GACAACTTCGAGTACCGGATAGATCAAGTACAGACTATCTAGCAAGCAACGGAGTCGCTTGATACCCGGACAGAAGTGG  
870 GATGTGGCCAAACAGTCCGGCGAATGGGAGCTACAGCCAGCAGGATTGTTGCACCACTCATGACACCAACAGAGGGCGAGAC  
871 TCAGCCAGAACAGGAGTGGCAGTATAAGTCTCAGATTCACCGACTTCCGAGATCAGAGGATCGTGGAAAGAAAGGCCAGTCCGA  
872 GGATGAGGGCAGGCCAGAAGGTGAAGAGGAGAGACGCACTACGTGCTCGTCTTACAGACATAACTCCTATGAGACCAACCTC  
873 AGAGGAGAAAGGAGGCCAAGGCAGAACGAACTTTCAGAGTTCACACCAGAGACAGATTTGGTGAGCCAATGGCTAAGCCAG  
874 CTATCCGCATCAGCACACAACAGTGGAGTGTCAAGCTCAGAAGAAGAACCGCTAGGTTGATGAAACTGATGAAGACAGTG  
875 ATGGCACAATAATGAGAAAACCTGGCAGAAGGAAGACCAAGGAAAGGAGAAATCTGGAGCTGCAAGGATGGAAAGAGACCT  
876 GCAGACCAGGCATATACGAACTGATCCAGAGGAAGAAAGGAAATCTACCTCAGATACGAGGCAAGACGAGGATCAGG  
877 AGGTACAGGTACTAGGGGCAACAACCATGGAGGAACCA GAAATGGAGTACCCACCAGACTGGAAGAGGTTATGGGCAAGC  
878 TAAAGAATGTCAGCATGGAGAAACTTTTCCAGTAAAGTGGCATGGATA GCGAGTCCAGCATCACAGGTGGAGGATTCATACCA  
879 CCAAGCCAGTACCAAGGAGCGCAGGGATACCCACCTGCCACAGGAGCGTCTGCTTCAACCATAGGGCCAGCAGATCTGCAAG  
880 GATGGGGAGGACGATTGCAAGGAGCAGATCGCCGATAGGATATGGCCGCCACAGCAGCCATGGTCTTACCATCAGCCCA  
881 GTCTGACAACGGCTGTATGCTAGTCTACTCAGGATTTACCTTAGTTCCCGATGTGATCAACCGATGGGAGTCTATTA CTGT  
882 CAACCTCATCAACAAATGATGTTTATTCCCTACAGGATAAGGCGGACTATGTAGAAAATCTCTTGGGAGAAA GAGAAAAGG  
883 AGACATGGATGACTTGGAGGATGCAGTACGAAAGAAGATAAAGCAACTCCTACCATGAGCGGAGACGTGAGGAATCTCAC  
884 TGCCGCACTCAAAGGGTCTTTGGCGTACATGACCCTCATACTGGATCAGTCCACATACAGAACCAGGCGTATGCAGAACTGG  
885 AGAGACTGTACTGTAAGCGGACAGACGACGTGATCCCTTCTCTACGACTACTACCAGCTAGCAGCTAAGTCTGGAAGGATG  
886 TGGCTCGGACCAGAGCTATCAGAAAACTTTT CAGAAAGCTTCCACTGAGATAGGGCCAATATTGAACAGGCTACAAAAGA  
887 CAGGTACCCAGGTCTCACCATTGGAGTCTTGGCAAGGGCCAATTCATCCTGGAATACCTACAAAACGCTCTGCAAGCAAGCAG  
888 CGTTACAGAGTCCCTGAAGAGCCTCAGTTTTTGCAGAAACATGCCGGTGCCTGGATACTATGAGAAAGAACAGTATGGCATC  
889 AGGAAAGCAAACCTTACAAGGGAAAGCCTACCCAACGCACGTA AAGGTGATCAAAAACAAGTACAAGCACACCTCCGGGA  
890 AGAAGTGCAAGTGTACTTTGCGGAATAGAAGGCCATTACGCCAGGGAATGTCCAAA GAAGGTGGTAAAA CCACAAAAGGC  
891 GGCATTTTCAATGGCATGGGCTTAGATGACAACCTGGGATGTTGTATCCGTA GAGCCAGGAGAGTCAAGTACGACGAAATC  
892 TGCAGCATCTCCGAAGGAGAGAACGCTGGGGGAATGCATGAACTCATGGCATTCAAAACTCAACTCCCGTACCCAGTCAAGTA  
893 CGAAGCCAGCACATCAACAGTTCTGCCATGGATA CAGGTAAGTGTGAGAAAAGTGATAAGCCCTCTTGGAGGAGAAGA

894 AGAGATATCCACAGGCCAAAAGGACTGCGCTCACACTTGGAGCGACACACAGGAAGTGCCGATAGAAGGGAGGATATGC  
895 AGCATTTGCAGTGATGAAACGCCTCATGGAAGGAGAGTCACTGCACGACCTGCAGCCTAACCTGTGTCCAATTTGCGCATA  
896 TATGGATCATGGAATTAAGCTGATCGCCGCAAGGGACACCAGAGACGCAGCAAAGTGCCAGTACCACAACAAAGATGAACTC  
897 ATCAGGCCACTCTATGAACA CAATGCCTTCTAACCGAAAGTGGAGGAACTGACGACCCAGCTGCAAGAATCCAAAACCG  
898 CAAGCCTGAAGACCTAATCAGCTTGGCGGATGATATGGAGGACGTGTCCATTCTGGA CAACGCCTCAAAA GGGGAA GGAG  
899 AAGGAATCTTTCAAATTCGGAA CGACGATTCCCA TCGATCACATCCAGAATCTTGAAAC GTAGCAAGAATGATCGAA CAATG  
900 GAAGGAGACCCCCAGAGTCACTATCAAGGAAA CAGCAGAAAGCAGCAACA CAATAGGAGCCCTCTA GCA GAAGAAGGGAT  
901 TGAAGAGCTAGCTGCAGCTGTTGATACGGCATA CACAGAAATGCCAAAAGGAGGTCTGAACAACTA TACAACACCA TTGTTG  
902 AGTTTGTAAATCCTCAGGAAAAGGGGCACCCACAAGATTCAGGGTTAGAGCAGTCATA GACA CAGGATGCACCTGCACATG  
903 CATCAACAGCAAGAAGTCCCTAAGGAAGCCCTGGAAGAA GCAAAGTATCAGATGAACTTTGCAGGAGTAAATTCCTACTGGA  
904 GAAACCAAGCTGAAAATGAAGATGGCAAGATGATAGTATCAGGAA GTGATTTCTACACGCCATATA TTGCA GCTTTCCCAAT  
905 GGAATTAACAGATGTGGACATGCTCATTGGCTGCAACTTCTTGGAGCCATGAAAGGAGGAGTCAAGCTGGAAGGAAC GGAG  
906 GTAACCATCTACAAGAGGTTACA ACTATCCA GACGACTCTAGAACACAGAAGATCTCTACTCCGTGCAGAAGCTGAAGC  
907 AGGAGAAGAAATCGAGAGACTTTACTACGCCAACGACTACTCTGAAGAAGGAGTAAACAGGCTGAGAAA CCATAA GCTGCTA  
908 CAAGAGCTCAAGGAGCAGGGTTACATTGGGGAAGAACCAATGAAGCACTGGGCGAAGAACGGAATCAAGTGAAGCTTGAT  
909 ATCAAGAACCAGATATAGTCATCAGCAGCAAACCTCCGGATGCAGTCTCAAAA GAGACGAAGGCCAGTACCAGAGACACA  
910 TCGATGCTCTATTGAAGATCAAGGTAATCCAA CCCAGCAAGAGCAAGCATCGAACTGCCACCTTCA TCAAAA CTGCGGTACA  
911 ACCATAGACCCGATA ACAAAGAA GGAGATCCGAGGAAAAGAGAGGATGGTCTTTGATTACAGA GCCTCAACGATAACACCC  
912 ACAAGGATCAGTACACCTTGCCTGGGATTAATACCA TCA TCTCCGCAATTGGCAACGCAAAAATCTTCAGCAAATTTGACTTGA  
913 AGTCTGGCTTCCACCAAGTACTTA TGATGAGGAGTCCATCCCTTGGACCGCTTTGTACACACAGTAGTTTCTACGAATGGA  
914 AGGTAATGCCTTTCCGACTCGCGAACGCTCCTGCA GTCTTCCAGAGGAAGATGGACCAGTGTTCGAGGAACTCTGAGTTC  
915 ATAGCCGTCTACATCGACGACATTCTGGTCTTCAGTAAGACGCTGAAGGAACATGAGAAGCATCTCAGCATCATGCTGGGAAT  
916 ATGTCGAGATAACGGCTGGTACTGTACCCAGCAAAATGAAGCTCGCCGCAACAGAGATAGATTTCTTGGGAGCAACCATTG  
917 GTGACGGAAAAATCAAGCTCCAGCCTCACATCATCAAGAAGATTGCCGAGGTGGACGATGAATCCCTAAAGACCCCTCAAAGG  
918 GCTGAGAAGCTGGTTGGGAGTTCTGAACTA TGCCAGGAACTACATCCCAA GTGTGGGACACTCCTTGGCCCACTCTACAGCA  
919 AGACGAGTGAGCACGGGGACAGAA GATGGCATGCATCGGATTGGGCCTTAGTCAAGAAAA TCAAAGCCTGGTCCAAAACCT  
920 CCCAGACCTCAA ACTGCCACTGAAGAGGCCTATATGATCATCGAGACAGATGGTTGTATGGAAGGATGGGGCGGAGTCTGT  
921 AAATGGAAGCCCAACAAGGCAGACTCAGCAGGAAAGGAAGAAATCTGCGCATATGCAAGTGGGAAATCCCAA CGGTCAAAT  
922 CAACTATTGACGCAGAAATCTTCGCGGTATGGAATCCTTGGAAAAATCAAGA TATTTTACATGAACAAGGATGAGATCACA  
923 TCAGGACCGACTGCCACGCCATCATAACCTTTTACGAGAAGTTAAACGCCAAGAAGCCTTACGCGTAAGGTGGTTAGCTTTTT  
924 GCGACTATA TAA CAACTCCGGGGT GAGGATGAAGTTCGAACATATCAAAGGCCAAGATAATCAATTAGCTGATAA TCTCAGT  
925 CGCCTAACCCAACTCATCA CCGCAGTAAGATGGCTTCCAGAGGAAATGGCAGGAATCGCGGCAGAACTAGTCAAA GACAGGG  
926 AAGAGTCCCCCGGATGCGAAGGTACAGGAGAGCCTCTCAGGCTTTCTCAAAGCTGCCCTCCTCAA GTCGAGAAATCCTCG  
927 ACTACAGCCCATCAGAGCCGCACCATGCTCTTGGCAGAGATGGACGAGTCTAGAAGACTGGCCAAA CAACGCCGAGACAA  
928 AGTCTTCGACGACGACGAGGGCAAACATCTGCGACACGGTCTACATCACCGGTGTCGACCTCGCCGCCGCAAGGC

929 **>epiRYNV-BS**

930 TGGTATCAGAGCTTTAGCTTTACCATGGTAGCTTAAACCCCCCATCTTGTGCGAGAAACCCAA GTTTCAGATCCGAACCTTGA  
931 GTTTGCTCTTTTTCGAAGAGGAGAGGGAGTGTGACCTTACTCAAACCTTTT GCGGATCAAACCCCA CGAAAACCTCCTTAC  
932 GGTATCATAAGTTTTCTGTCTTCACTAGTCCAACCTACTGCTCAAATCGCAGGTCTAGGCGTCAAGCGAAGTACCCTTGTA  
933 GCCGTTAGCAGAGTGGCGTTAGCGTTGATGGGGAAA ACTGACGTAAGA AAGCGACAGCAA CTAGGCGAGGAAA CTGACG  
934 GACAAATACCCGGCCGGAAGCTAGTAAGCGGCTAGATCTGTGTGGTTTTGATGCAACCACACGAAA TCTCCGAATTCGAAGC  
935 AGAGAGCAGCTCTTGGGAAAGATCTGAACGGGCGTATCGACAAGACTTCTCATT CAGGAA TCTCAGAACCTATCCACGTTGGG  
936 AATCAAACCAGAGGACACCCTCTTTGAA TTTCCGTGCTACCA TTACAACACAACA ACTGGACCTCCAGTCCACCGTACTCTCT  
937 CAGACAAGGTGACGGCAAGGATTTACCATACTTAGTAAACACCTTGTTCGATCTCAATATCACC GAGATCCA CAATCAGGCGAT  
938 CCTTGACGATAAGATCTCAAGGCTCACCGA GTACCTGACAA CAAAAGTGGTTCCCTACCAGCATCCCGGAGGATTCGCCCT  
939 CCTGGACCAAATAGCCTTTTCTTAGATCTACAGGCCCTCAAGGCAGATCTGAAGGAAATCAAGGCCACACAGTCAAGCAAAA  
940 AGCTAGCCTTCTACA ACTGCAGGAGGCA GTCCAGCTTTTTATCGCTCGGGAGAACGATCCCAAGCCGATCGAGGACGACTACT  
941 GCACAAGTAGCCGAACAGCTGAGGAAAGCA ACTCATCGAGGTCAAGACAGTCTCGAAGAGACCAAGAAGATCGCCAGGTCTCT  
942 TATCCCCGACGGATGAACCTAGGTGGCAGGAACTGCAGCCAA GGAACCTATCAAAGCGATCCAAGCAACCGCTTCCC  
943 TCACCTCAAACGGCACCGGCCAAGGCTTATTGAGCCCCACACTACCCGGAGGACAGTTATCTACCAATCTAGCCAAGCAAA  
944 ACAACACCATAATCGAATTA TTGGTGCAAGTGCTAGAAA GAATCTGACCTTGAACGGGGCGTAGCCAACCTCACAGGTCAA



945 GTC ACTAGGCTCGAAAAAGCCGTA GCAGACAAAGAAGCAGTCAAGCTTCCGGAAAAAGTCTA GAAGACCTAACCAAGGAAT  
946 TTGGAAAGGTTAACTTAGGCAAAGGAAAGGGGAAAAAAGGAAAGTCTCAAGCCGAGACAGAACTTCTACGTGTGGAAAAC  
947 CCCTACACTCAATACAA TGAGCAGAAGCCACACAAGGCTCCAA GCGCCCCCGCAACTGAAAGGGCCA CAAGCA GCTCGGATT  
948 CAGGGACACCAACCTGGAAGACCAGATCCGAGGATACAGGAGATCTGCACGCA TGAGGCATCAAGCGCAGCAGAGACTAC  
949 GGAGGACCTTCGGAAGGGACTTCAGAAAACGATCGAGAGACAACTCGATCCTGATGCAGAGCTCTCCCTCAGTCGAAGGAG  
950 AAGAGCCAACCTTGGTACCGGCGGAAGTGCTCTACGCACACAACGGACAAGAACC GGTC AACCGAGTATACGAGCACTACAGT  
951 GAGCTACGCGCTCATGTGGTAGACAGGCA GCAGGACTTCCGATTTATAGAGGAAGCGTCCTATCAAAGGCTGACCA GAGAAG  
952 GAATGCAGTTCATCCACGTA GGTATGGCGATGGTCAGGATA CAAATGCTGCACAGGACAGATGCGGGTATATCCGCACTAGT  
953 GGTGTTCCGAGACACCCGATGGA GCGATGACAGGCAGGTCATCGGTAGTATGTACGTCGATATGACACGAGGAGCGCAGTTG  
954 GTATACATCATACCAACGCCATGATGTGATTCTACTTCTACAA CCGGATTCAGGTCAGCATACAGACCAGAGGATACGG  
955 CACAGGCTGGGAAGGAGGCGACAGCAACATGATTATCACAAGATCA TTAGTCGGCCGACTCAAAACACCAGCATCACAAGC  
956 TTCGAGTACAGGATAGACAACTGACAGACTACCTAGCCA GCAACGGCGTAGCCTGCATTCCCGGACAGAAAGTGGTCCGTGG  
957 CAAAACAGGTCTGGAGAATGGAACTCCAGCCAAGCAGGATAGCAGCACCACTTGCAGTCCCCACAGATGCCAGGCTAAGACA  
958 GAACCCAAACGGCAACATCAGCCTGAGGTTACGGATTTCCGCGA CCAAAGGATCGTGGAAGAAGGAGAGACATCCGAGCCA  
959 GAAGGAAGACCGGAGACGAAGGAGGATGAGAGCAGCACTACGTCTTATGTTCAAACACTCCAGCCCTAGGTGGGATACG  
960 CTCGGA CAGCCCAGCGTAAAACGACTACATGTTCCGATATGACGCACCAAGACCGACCATGGCCAACAA CAAACAGAG  
961 GATGGGACGATGACCTCCTAAGCCA CCAAGCCCAAAGGATCCTACGAGGTAAGCCTAAGAGGCGAAAAGAAGCTGAAAAG  
962 AAAAGGAACTCGCAGAGTTACCCCAGAGACAGATCTGGTCAGCCA GTGGCTAA ACCAACTCTCGAACTCGGCACACAACAGT  
963 GGAGCTTCAAGCTCAGACGATGAGCCAAAGTTGATGAGGCAGACGACGAGGACGACGTCTACAATCAGAAAACCTGGGAG  
964 AAGGAAGACCAGGAAAAGAGGGAGCTGGAACCTCAAAGGTGGAA ACCCACAGGGAGGCCAGGCCTCTATGAAATGATCCCT  
965 GAGCAA GAAGAAGAAGTCTACCTCAGGTACGAGGCAGAGGACGAAGAGGAGGATCAGGAGTTGCAGGTCATAGGAGCCGC  
966 AACAAATGGATGAGCCAGAGATGGAATACCCAA CAGGCTGAAAAA GTAATGGGCAAACTCAAAAA CGTAAGCATGGAGAA  
967 GCTGTTCCAGTGAGCGGGATGGATAGCGAATCCAGCATAACAGGAGGTGGTGGAGGTTTTATACCA CCAAGCCAGTACCG  
968 GGAGCA CAAGGATACCCCCAGCAACAACTCCACTATGTCCACCATTGGAC CAGCAGACATGCAGGGATGGGGAGGG AGA  
969 GTGCCAGAAGTAGGTCACCATTAGGGTATGGCAGACCACAACAGCCATGGTCACTACCA TCAGCAGTCAGACAACGGCT  
970 GCATGCTAGTCTTCCACAGGACTTACCCTAATACCGGATGTCA TCAACCGATGGGAATCCATAA CAGTCAACCTCATCAACA  
971 AAATGATGTTTGACTCCCTGCAGGACAAGGCCGACTACGTGAGAACCTTCTGGAGAACGAGAAAAGGAGACGTGGATGAC  
972 ATGGCGGATGCAATATGAA GAGGAGTATAACA ACTCCTTACGATGAGCGGAGATGTGAGGAATATCACAGCCGCA GTCAAG  
973 CGGGTCTTCGGAGTACACGATCCGCATACAGGATCAGTCCACA TCCAGAATCAAGCATATGCAGAGCTCGAAAGGCTCTACTG  
974 CAAACGGACGGACGACGTGATCCCTTCTATACGACTACTATCAGCTAGCAGCAAATCGGGAAGGATGTGGCTCGGACCC  
975 GAGCTATCAGAGAAGCTGTT CAGAAA GCTTCCACCTGAGATAGGACCTACCATCGAGCAGGCCTATAAGGATCGATATCCAGG  
976 GCTGACCA TTGGATTTTGGCCAGAGCAAACCTTATCCTGGAATATCTACAGAA CGTGTGCAAGCAGGCA GCACTGCAGCGTT  
977 CGCTAAAAGCCTGAGCTTCTGCAGGAATA TGCCGGTCCCCGGA TACTATGAGAAGAAGCAATATGGTATCAGAAAGGCTAA  
978 AACCTCAAAGGTAAGCCTCATCCGACCCACGTTAAGGTGATAAAAAACAAGTA CAAGCATACGAGGGGAAGAAATGCAAG  
979 TGCTACTTGTGTGGGATCGAAGGTCACTATGCCCGA GAGTGCCCAAAGAAAGGTGGTCAAA CCACAACGAGCGGCCTATTCAA  
980 TGGCATGGGACTAGACGTA AACTGGGATGTAGTCTCGGTGCAACCAGGAGAAGAA GACGACGACGAGATCTGCAGCATCTCA  
981 GAAGGAGAAAACACTGGCGGAATGCACGAACTTATGGCATTCAA AACACA ACTCCCTTATCCAGTGGAGTATGAAGCCAGCA  
982 CACCA CAGTTCCTGATGCCATGGA CACAGGTACCTGTGGAAAAGAGCGACAAAACCTTCCCTGGAGAAGACGGAAAGGATATCTC  
983 ACAAGTCCAGAAGGACTGCACACA CACTGGAGTGACACCCAGGAAGTGCCTATCAGCGACAGGGTTTGCAGCATCTGTAGT  
984 GACGAAAACCTCA CGGTAGAA GAGTCACTGCATACATGCAACATCAACCTCTGTCCGATATGTGCAAGGATGGACTATGG  
985 GATCATGCTGATAGCAGCAAAA GACCAAGAGCGCAGCA CATTGGCAGTACCAAAA CAAGGATGAGCTCATACAGCACTG  
986 TACGAA CACAACGCTTTTCTCACCAGGAAA GTAGCAGAGCTACTAGCCAGCTGCAGGAATTCCACAACCGCAGGCCTGAAGA  
987 CCTGATCAGCCTAGCGGATGACCTGGAGGACGTGTCCATCCTGGACAACGCCTCAAACAGGGGGAAGGAGGAGAA GGAATT  
988 GTTCCAA TTTGGA ACTACAATTC CATCGACCACATA CAAAACCTTGAAAATGTGGCCAAGATCATA GAAAAGTGGAAAGATA  
989 CCCCAGGGTCTGTAATCAAGGA AACACCA GAAAGCAGTACCA GTAACACCA TCGGAGCACTTCTAGCTGAGGAAGGAATCGA  
990 AGAACTGGCTGCAGCGTTGACACCGCCTATACCGAGATGCCAAAAGGAGGCCTCAACAA ACTTTACAACACAATTGTGGAGT  
991 TCGTCA TACCTCAGGAAAAGGGAGCA CCCACGAAGTTCAGAGTTCGTGCTGTGATAGATACTGGATGCACCTGCACGTGCATT  
992 AACAGTAAAAAGTTCCAAAGGAGGCACTCGAAGAA GCGAAGTACCAGATGAACTTCGAGGGGTTAACTCAACAGGGGAG  
993 ACCAAGCTGAAAATGAAGAACGGGAAGATGATCGTGTGTCAGGCAGCGACTTCTACACCCGATATATAGCAGCTTCCCAATGGA  
994 GTTGCCAGACGTAGACATGCTGATTGGCTGCAACTTCTTGCAGCCATGAAGGGAGGCGTAAGACTCGAAGGAACGGAAGTG  
995 ACTATCTACAAGAAAGTCAACCAA TCCAAA CAACCTAGAGCCACA GAAGATATCCCTCCTCGAGCAGAGGCTGAAGTCGG  
996 AGAAGAACTAGAGCGCATGTA CTAAGCCAATGACTATTCCGAGGAAGGAATAAGTCGGCTGAAGAACCACAGGCTGCTGCAG  
997 GAACTCAGAGAACAAGGGTACATTGGTGAAGAGCCAATGAGACACTGGGCAAA GAACGGCATCAAATGCAAGCTGGATATC

998 AAGAATCCAGACATAGTCATCAGCAGCAAACCGCCTGACTCTGTATCAAAAGAGACGAAAGCCCAATACCAAAGGCATATAGA  
999 TGCCCTGCTCAAATCGGAGTAA TCCAGCCCAGCAAGAGCAAACACAGGACGGCGGCTTTTATCACACTCGGGTACGTCAA  
1000 TTGACCCGATTACCAAGAAAGAA GTCAGAGGGAAAGAACGGATGGTATTGACTACCGAAGTCTCAACGACAATACCCACAA  
1001 AGATCAGTACACTGCCGGGTATCAATACCATCATATCCGCGATTGGCAACGCTAAAATATTTAGCAAGTTGATCTAAAGTC  
1002 CGGATTCCATCAGGTGCTCATGGACGAAGAATCCATACCATGGACGGCTTTGTAACGCCAGTCGGATTCTATGAATGGAAGG  
1003 TCATGCCCTTTGGCCTTGCCAATGCTCCAGTGTCTTCCAAGGAAGATGGACCAATGCTTCGCTGGAACTTCGGAATTCATCG  
1004 CAGTCTACATCGATGACATCCTGGTGTTAGCAAAAACCTAAAGGAGCAGAGAAA CACCTTAGCATCATGCTAGGGATATGC  
1005 CGTGATAACGGTTTGGTTTTATCGCCAGCAAATGAAGTTGGCCGCCACA GAGATAGACTTCCTTGGCGCCACCATA GGCGA  
1006 TGGAAGGATCAAGCTCCAGCTCACATCAAAA GAAGATAGCCGAGGTGGATGACGAATCCCTGAAAACCTCAAAGGGTTA  
1007 CGAAGCTGGTTGGGAGTGCTCAACTACGCGCGCAACTACATCCAAA GTGTGGCACACTGTTAGGCCACTATA CAGCAAGAC  
1008 CAGCGAGCATGGTGATCGTAGGTGGCACGCTGTATTGGCCTTAGTCAAAGAATTAAGGGCTGGTCCAAAACCTCCCA  
1009 GACCTAAAACCTCCCACGGAAGAGGCATACATGATCATTGAGACTGATGGATGCATGGAGGGCTGGGGAGGAGTCTGCAAT  
1010 GGAAGCCCATGAAGGCAGACTCAGCAAGCAAGGAA GAAATCTGCGCTTACGCCAGTGGTAAATTCCCCACGGTAAAAATCAAC  
1011 AATAGACGCAGAAATCTTCGAGTTATGGAGTCTTGGAAAATTCAAGATTTTTTACATGAACAAGGACGAGGTCACTATCA  
1012 GGACTGATTGTCAAGCAATAATCACCTTCTACGAGAAGCTGAATGCAAAA GAAACCTTCGAGGGTAAGTGGCTTGCCTTTTGC  
1013 GATTATATAACGAACTCCGGGGTAA GAATGAAGTTCGAACATA TAAAAGGTAAGACAAC CAGCTCGCAGATAACCTCAGCC  
1014 GTCTCACAACTGATTACATTTGTGAAATGGCTTCCAACCGAGCTCAAGGACCTCGCGGCA GAACTAAC CAGGAAAGACGAC  
1015 GGGACGCCCCGGAAGAA GGAAGTGAGGAGGAAATCTCTGTTTTCTCGAAGCTGCCCTCCGCCGAGCCAAGAGATCCGTGA  
1016 CTACTACCAATCCGAGCCACGCCATGTACTATGGCAGAAATGGCAGAATCCAGAAGGCTGGCTCTACTGCGACGAGAGGAG  
1017 ATCTTCAACAGCCTTGCCCAACACATCAGCGACACGGTCTTCA TACC GGAGTCGACCTTGC GGCAGCAAAA GGCCAGAGCAAC  
1018 CAGGGACAACCTGGTATGCTGACATCACCAACACTGGAACGACGAGCCAC CGCAGCATGGAAGCTCATGGCCGTTACGAG  
1019 GAATTCGCCACGTGTAA GGATGTGAACGTTTAGTGAA GCGACGTCAGCAATGACTTCA CAATCGCCCAAGTGCCTACTGCTT  
1020 ACGCTTGGGAACTTATCTTTTAGTGTGCGGTAGCATCTTCTAGCTGCCATACTTTATTGTAAGTGC GCGGATAGTGCCTGAGTC  
1021 ATAGTGATAAGGAATCTTATCACCTTATCGTCTTTCTTAGCTTTAGTAGCTGTAAAGACGAACTTATTAGCTGTGATGGGGCC  
1022 CAGAAAGCGCACCCGAGCTGATTTTTCTCTTTCTGCTAAGCCCTCCCCATATAAGGGAGAAGAGTTTGAAGGCTTAGGC  
1023 ACAGAGCAATCTCTAGCCAACCTTTCTCTTGAGTTGTATTA AAACATTCAAGTGAAATAAAGACTTGTTCATCTTTTCCGCAT  
1024 ATCTCTGAGTTTTTATGAGTTCTTAAGTGTTCGAAAGCGCACTTTTGAATTAGATCCA TGTTTTTCGGACCCCATTC  
1025

1026  
1027

**Supplemental table. 271 public and proprietary genetics were bulked into 294 samples and used in validation of epiRYNV-BS detection assay.**

| Bulked sample number | Genetic/cultivar           |
|----------------------|----------------------------|
| 1                    | Selection 1, Selection 2   |
| 2                    | Selection 2, Selection 3   |
| 3                    | Selection 4, Selection 5   |
| 4                    | Selection 5, Selection 6   |
| 5                    | Selection 7                |
| 6                    | Selection 7                |
| 7                    | Selection 8, Selection 9   |
| 8                    | Selection 9                |
| 9                    | Selection 10, Selection 9  |
| 10                   | Selection 10, Selection 11 |
| 11                   | Selection 12, Selection 13 |
| 12                   | Selection 13, Selection 14 |
| 13                   | Selection 15, Selection 16 |
| 14                   | Selection 16, Selection 17 |
| 15                   | Selection 18, Selection 19 |
| 16                   | Selection 19, Selection 20 |
| 17                   | Selection 20               |
| 18                   | Selection 20, Selection 21 |
| 19                   | Selection 22, Selection 23 |
| 20                   | Selection 23, Selection 24 |
| 21                   | Selection 25, Selection 26 |
| 22                   | Selection 26               |
| 23                   | Selection 27               |
| 24                   | Selection 27, Selection 28 |
| 25                   | Selection 28, Selection 29 |
| 26                   | Selection 29               |
| 27                   | Selection 30               |
| 28                   | Selection 30, Selection 31 |
| 29                   | Selection 31, Selection 32 |
| 30                   | Selection 32               |
| 31                   | Selection 33               |
| 32                   | Selection 33               |
| 33                   | Selection 33, Selection 34 |
| 34                   | Selection 35, Selection 36 |
| 35                   | Selection 36, Selection 37 |

|    |                            |
|----|----------------------------|
| 36 | Selection 38, Selection 39 |
| 37 | Selection 39, Selection 40 |
| 38 | Selection 41, Selection 42 |
| 39 | Selection 42               |
| 40 | Selection 42, Selection 43 |
| 41 | Selection 43, Selection 44 |
| 42 | Selection 45, Selection 46 |
| 43 | Selection 46, Selection 47 |
| 44 | Selection 47, Selection 48 |
| 45 | Selection 48               |
| 46 | Selection 49               |
| 47 | Selection 49, Selection 50 |
| 48 | Selection 51, Selection 52 |
| 49 | Selection 53               |
| 50 | Selection 53, Selection 54 |
| 51 | Selection 54, Selection 55 |
| 52 | Selection 55               |
| 53 | Selection 56               |
| 54 | Selection 56, Selection 57 |
| 55 | Selection 57, Selection 58 |
| 56 | Selection 58               |
| 57 | Selection 59               |
| 58 | Selection 59, Selection 60 |
| 59 | Selection 60, Selection 61 |
| 60 | Selection 61               |
| 61 | Selection 62               |
| 62 | Selection 62, Selection 63 |
| 63 | Selection 63, Selection 64 |
| 64 | Selection 64               |
| 65 | Selection 65, Selection 66 |
| 66 | Selection 66               |
| 67 | Selection 67, Selection 68 |
| 68 | Selection 68, Selection 69 |
| 69 | Selection 70, Selection 71 |
| 70 | Selection 71               |
| 71 | Selection 72               |
| 72 | Selection 72, Selection 73 |
| 73 | Selection 74, Selection 75 |

|     |                              |
|-----|------------------------------|
| 74  | Selection 76                 |
| 75  | Selection 76, Selection 77   |
| 76  | Selection 77, Selection 78   |
| 77  | Selection 78, Selection 79   |
| 78  | Selection 80                 |
| 79  | Selection 80, Selection 81   |
| 80  | Selection 81, Selection 82   |
| 81  | Selection 82                 |
| 82  | Selection 83                 |
| 83  | Selection 83, Selection 84   |
| 84  | Selection 84, Selection 85   |
| 85  | Selection 85                 |
| 86  | Selection 86                 |
| 87  | Selection 86, Selection 87   |
| 88  | Selection 87, Selection 88   |
| 89  | Selection 88                 |
| 90  | Selection 89                 |
| 91  | Selection 89, Selection 90   |
| 92  | Selection 90, Selection 91   |
| 93  | Selection 91                 |
| 94  | Selection 92, Selection 93   |
| 95  | Selection 93, Selection 94   |
| 96  | Selection 103, Selection 94  |
| 97  | Selection 103, Selection 104 |
| 98  | Selection 105                |
| 99  | Selection 105, Selection 106 |
| 100 | Selection 106, Selection 107 |
| 101 | Selection 107                |
| 102 | Selection 108, Selection 109 |
| 103 | Selection 109, Selection 110 |
| 104 | Selection 111, Selection 94  |
| 105 | Selection 94, Selection 95   |
| 106 | Selection 96, Selection 97   |
| 107 | Selection 97, Selection 98   |
| 108 | Selection 99                 |
| 109 | Selection 100, Selection 99  |
| 110 | Selection 101, Selection 102 |
| 111 | Selection 102                |

|     |                              |
|-----|------------------------------|
| 112 | Selection 103, Selection 111 |
| 113 | Selection 112                |
| 114 | Selection 112, Selection 113 |
| 115 | Selection 113, Selection 114 |
| 116 | Selection 114                |
| 117 | Selection 115, Selection 116 |
| 118 | Selection 117, Selection 118 |
| 119 | Selection 118                |
| 120 | Selection 119                |
| 121 | Selection 119, Selection 120 |
| 122 | Selection 120, Selection 121 |
| 123 | Selection 122, Selection 123 |
| 124 | Selection 123, Selection 124 |
| 125 | Selection 124, Selection 125 |
| 126 | Selection 125                |
| 127 | Selection 125, Selection 126 |
| 128 | Selection 126, Selection 127 |
| 129 | Selection 127, Selection 128 |
| 130 | Selection 128                |
| 131 | Selection 129, Selection 130 |
| 132 | Selection 130                |
| 133 | Selection 131                |
| 134 | Selection 131, Selection 132 |
| 135 | Selection 132, Selection 133 |
| 136 | Selection 133, Selection 134 |
| 137 | Selection 135, Selection 136 |
| 138 | Selection 137                |
| 139 | Selection 137, Selection 138 |
| 140 | Selection 138, Selection 139 |
| 141 | Selection 139                |
| 142 | Selection 140                |
| 143 | Selection 140, Selection 141 |
| 144 | Selection 141, Selection 142 |
| 145 | Selection 142                |
| 146 | Selection 143                |
| 147 | Selection 143                |
| 148 | Selection 144                |
| 149 | Selection 144, Selection 145 |

|     |                              |
|-----|------------------------------|
| 150 | Selection 145, Selection 146 |
| 151 | Selection 146                |
| 152 | Selection 147, Selection 148 |
| 153 | Selection 148, Selection 149 |
| 154 | Selection 150                |
| 155 | Selection 150, Selection 151 |
| 156 | Selection 151, Selection 152 |
| 157 | Selection 152                |
| 158 | Selection 153                |
| 159 | Selection 153, Selection 154 |
| 160 | Selection 154, Selection 155 |
| 161 | Selection 156                |
| 162 | Selection 156, Selection 157 |
| 163 | Selection 157, Selection 158 |
| 164 | Selection 158                |
| 165 | Selection 159                |
| 166 | Selection 159, Selection 160 |
| 167 | Selection 160, Selection 161 |
| 168 | Selection 161                |
| 169 | Selection 162                |
| 170 | Selection 162, Selection 163 |
| 171 | Selection 163, Selection 164 |
| 172 | Selection 164                |
| 173 | Selection 165                |
| 174 | Selection 165, Selection 166 |
| 175 | Selection 166, Selection 167 |
| 176 | Selection 168                |
| 177 | Selection 168                |
| 178 | Selection 169                |
| 179 | Selection 169, Selection 170 |
| 180 | Selection 171                |
| 181 | Selection 171, Selection 172 |
| 182 | Selection 172, Selection 173 |
| 183 | Selection 173                |
| 184 | Selection 174                |
| 185 | Selection 174, Selection 175 |
| 186 | Selection 176                |
| 187 | Selection 176, Selection 177 |

|     |                                 |
|-----|---------------------------------|
| 188 | Selection 177, Selection 178    |
| 189 | Selection 178                   |
| 190 | Selection 179                   |
| 191 | Selection 179, Selection 180    |
| 192 | Selection 180, Selection 181    |
| 193 | Selection 181                   |
| 194 | Selection 182                   |
| 195 | Selection 182, Selection 183    |
| 196 | Selection 183, Selection 184    |
| 197 | Selection 184                   |
| 198 | Selection 185                   |
| 199 | Selection 185, Selection 186    |
| 200 | Selection 186, Selection 187    |
| 201 | Selection 187                   |
| 202 | POLKA, QUALICUM                 |
| 203 | QUALICUM, YELLOW ANTWERP        |
| 204 | CHILCOTIN, LATHAM               |
| 205 | CHILCOTIN, KORBFUELLER          |
| 206 | SOUTHLAND, SUMMIT               |
| 207 | MALLING JEWEL, SUMMIT           |
| 208 | MANDARIN, Selection 188         |
| 209 | PHOENIX, Selection 188          |
| 210 | BAUMFORTH SD.A, HERITAGE        |
| 211 | SEPTEMBER, BAUMFORTH SD.A       |
| 212 | Selection 189, ST. REGIS        |
| 213 | CUTHBERT, ST. REGIS             |
| 214 | MALLING LANDMARK, Selection 190 |
| 215 | MALLING LANDMARK, TITAN         |
| 216 | AUTUMN BLISS, CHEMAINUS         |
| 217 | Selection 248, CHEMAINUS        |
| 218 | Selection 191, Selection 192    |
| 219 | Selection 192, TULAMEEN         |
| 220 | MEEKER, OCTAVIA                 |
| 221 | OCTAVIA, Selection 193          |
| 222 | Selection 194                   |
| 223 | Selection 194, Selection 195    |
| 224 | Selection 195, Selection 196    |
| 225 | Selection 196, Selection 197    |



|     |                              |
|-----|------------------------------|
| 226 | Selection 197, Selection 198 |
| 227 | Selection 198                |
| 228 | Selection 199, Selection 200 |
| 229 | Selection 200                |
| 230 | Selection 201                |
| 231 | Selection 202                |
| 232 | Selection 202, Selection 203 |
| 233 | Selection 203, Selection 204 |
| 234 | Selection 204                |
| 235 | Selection 205                |
| 236 | Selection 205, Selection 206 |
| 237 | Selection 206, Selection 207 |
| 238 | Selection 207                |
| 239 | Selection 208, Selection 209 |
| 240 | Selection 209, Selection 210 |
| 241 | Selection 210, Selection 211 |
| 242 | Selection 211                |
| 243 | Selection 212                |
| 244 | Selection 212, Selection 213 |
| 245 | Selection 213, Selection 214 |
| 246 | Selection 214, Selection 215 |
| 247 | Selection 215, Selection 216 |
| 248 | Selection 216, Selection 217 |
| 249 | Selection 217, Selection 218 |
| 250 | Selection 218, Selection 219 |
| 251 | Selection 219                |
| 252 | Selection 220                |
| 253 | Selection 220, Selection 221 |
| 254 | Selection 221, Selection 222 |
| 255 | Selection 222, Selection 223 |
| 256 | Selection 223, Selection 224 |
| 257 | Selection 224                |
| 258 | Selection 225                |
| 259 | Selection 225, Selection 226 |
| 260 | Selection 227                |
| 261 | Selection 228                |
| 262 | Selection 228, Selection 229 |
| 263 | Selection 230, Selection 231 |

|     |                              |
|-----|------------------------------|
| 264 | Selection 231                |
| 265 | Selection 232                |
| 266 | Selection 232, Selection 233 |
| 267 | Selection 233, Selection 234 |
| 268 | Selection 234                |
| 269 | Selection 235                |
| 270 | Selection 235, Selection 236 |
| 271 | Selection 236                |
| 272 | Selection 236, Selection 237 |
| 273 | Selection 238, Selection 239 |
| 274 | Selection 239, Selection 240 |
| 275 | Selection 241, Selection 242 |
| 276 | Selection 242, Selection 243 |
| 277 | Selection 244, Selection 245 |
| 278 | Selection 245, Selection 246 |
| 279 | Selection 246                |
| 280 | Selection 246                |
| 281 | Selection 246, Selection 247 |
| 282 | Selection 1, Selection 247   |
| 283 | Selection 3, Selection 77    |
| 284 | Selection 120, Selection 129 |
| 285 | Selection 147, Selection 175 |
| 286 | Selection 175, Selection 196 |
| 287 | Selection 199, Selection 208 |
| 288 | Selection 208, Selection 209 |
| 289 | Selection 214, Selection 216 |
| 290 | Selection 216, Selection 218 |
| 291 | Selection 222                |
| 292 | Selection 222, Selection 226 |
| 293 | Selection 227, Selection 229 |
| 294 | Selection 230                |

1028

1029

1030 **Supplemental figure. epiRYNV-BS detection using RYNV6-F/R PCR assay. 271 public and proprietary genetics**  
1031 **were bulked into 294 samples. Off-target was observed in 43 cases.**

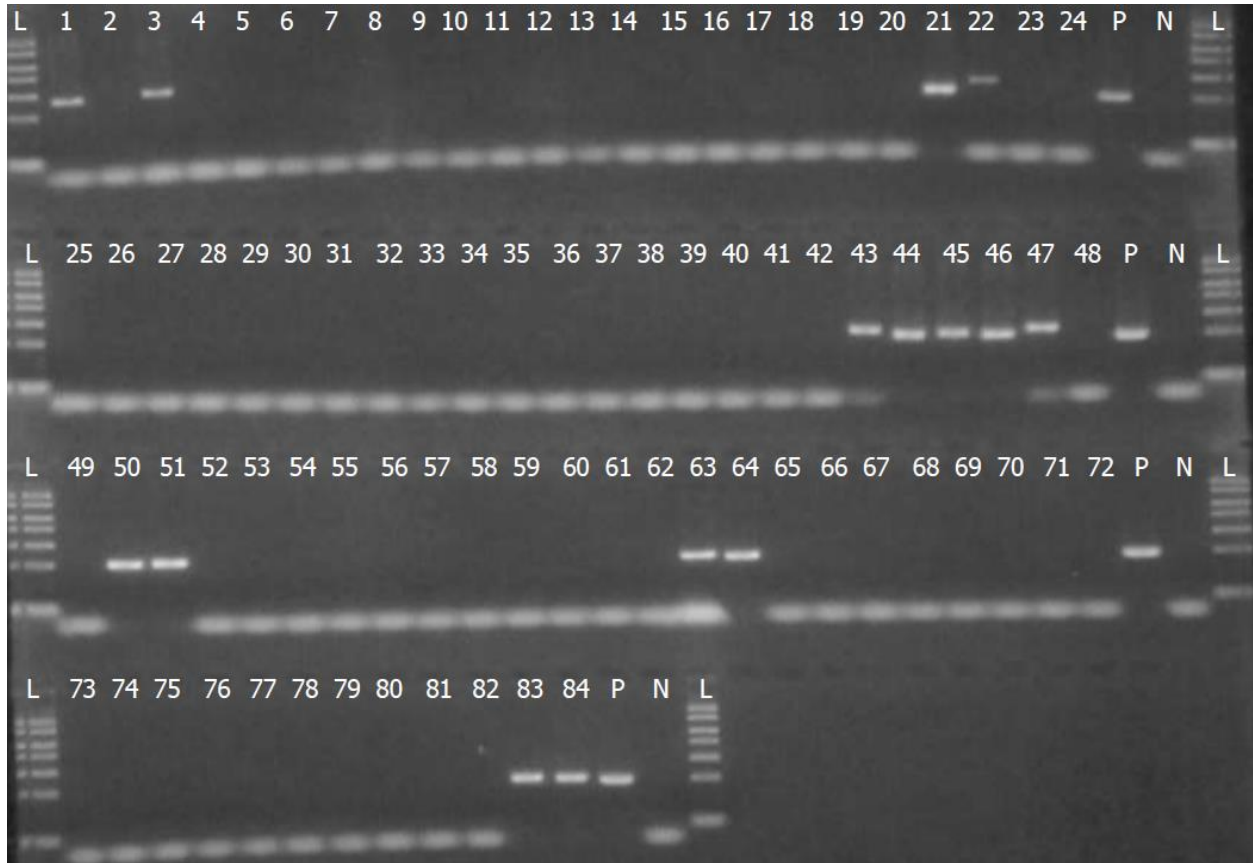

1032

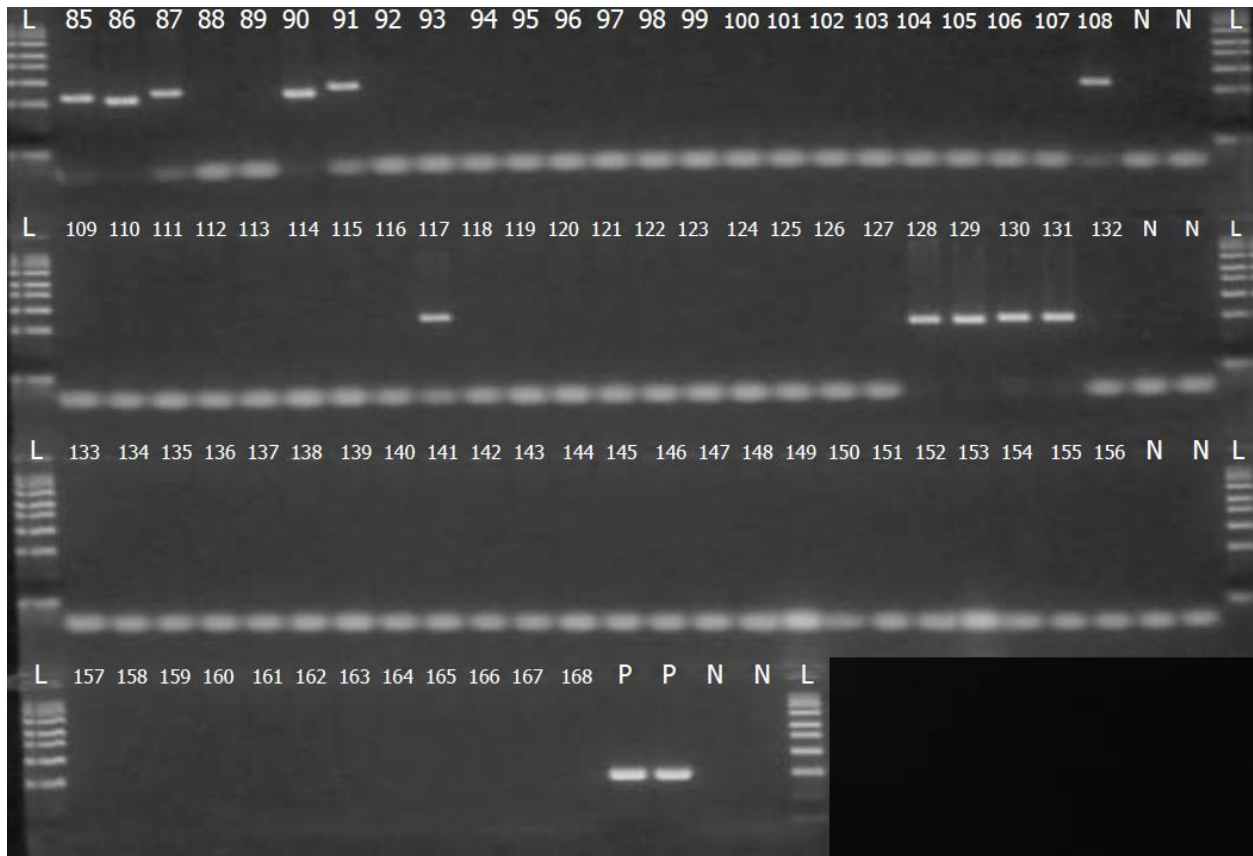

1033

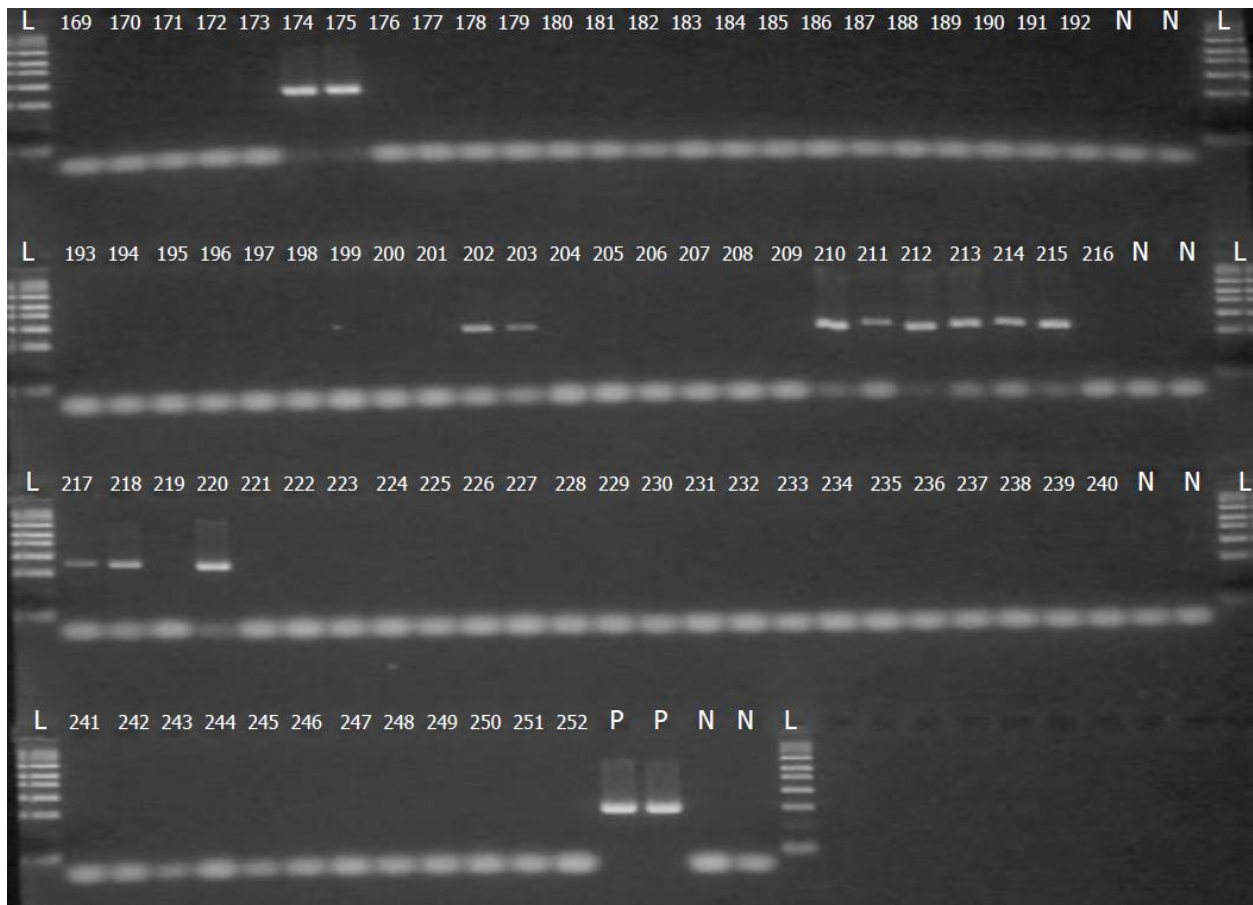

1034

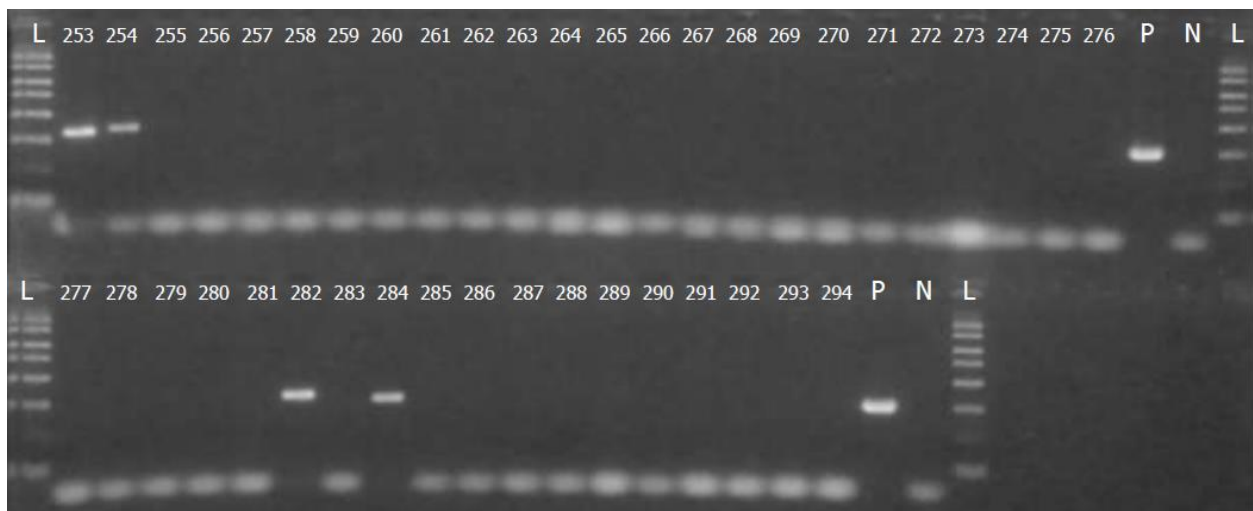

1035

1036

1037
